# Supplementary material for: Genome-wide association study of hyperthyroidism based on electronic medical record from Taiwan
Source: Front Med (Lausanne). 2022 Jul 27;9:830621. doi: 10.3389/fmed.2022.830621 (PMC9390483; doi:10.3389/fmed.2022.830621)
Supplement: Supplementary file 2 [file Table_1.XLSX]

## Sheet: All SNPs
Discovery			Replication
CHR	SNP	UNADJ	UNADJ	geneID		Discovery	<5*10-8
2	rs10490516	2.469e-12	2.305e-07	#N/A		Replication	<1.75*10-5
2	rs231804	1.884e-12	2.573e-07	#N/A
2	rs231738	1.587e-12	2.72e-07	#N/A
2	rs231735	1.587e-12	2.72e-07	#N/A
2	rs6714925	1.587e-12	2.72e-07	#N/A
2	rs231734	1.587e-12	2.72e-07	#N/A
2	rs231733	1.587e-12	2.72e-07	#N/A
2	rs3116514	1.587e-12	2.72e-07	#N/A
2	rs3115969	1.587e-12	2.72e-07	#N/A
2	rs12986861	1.587e-12	2.72e-07	#N/A
2	rs863603	1.587e-12	2.72e-07	#N/A
2	rs144115812	1.63e-12	2.72e-07	#N/A
2	rs1968351	1.63e-12	2.72e-07	#N/A
2	chr2:203832143_TA_T	1.63e-12	2.72e-07	#N/A
2	rs61272514	1.63e-12	2.72e-07	#N/A
2	rs34461055	1.63e-12	2.72e-07	#N/A
2	rs231789	1.63e-12	2.72e-07	#N/A
2	rs231790	1.63e-12	2.72e-07	#N/A												ll
2	rs231791	1.63e-12	2.72e-07	#N/A
2	rs231792	1.63e-12	2.72e-07	#N/A
2	rs231796	1.63e-12	2.72e-07	#N/A
2	rs2162606	1.63e-12	2.72e-07	#N/A
2	rs231797	1.63e-12	2.72e-07	#N/A
2	rs13033315	1.63e-12	2.72e-07	#N/A
2	rs11571303	1.63e-12	2.72e-07	#N/A
2	rs231799	1.63e-12	2.72e-07	#N/A
2	rs231800	1.63e-12	2.72e-07	#N/A
2	rs231806	1.63e-12	2.72e-07	#N/A
2	rs231810	1.63e-12	2.72e-07	#N/A
2	rs6715389	1.87e-12	2.752e-07	#N/A
2	rs231746	1.063e-12	3.025e-07	#N/A
2	rs35702010	2.071e-12	3.067e-07	#N/A
2	rs13030124	1.305e-12	3.21e-07	#N/A
2	rs231811	1.469e-12	3.431e-07	#N/A
2	rs34050244	1.679e-12	3.489e-07	#N/A
2	rs6745050	1.827e-12	3.53e-07	#N/A
2	rs1863800	6.789e-13	3.976e-07	#N/A
2	rs369966005	2.393e-12	4.023e-07	#N/A
2	rs376256365	2.393e-12	4.023e-07	#N/A
2	rs12990970	6.796e-13	4.065e-07	#N/A
2	rs34636506	1.843e-12	4.368e-07	#N/A
2	rs11571304	1.823e-12	4.565e-07	#N/A
2	rs1024162	4.738e-13	4.854e-07	#N/A
2	rs11571291	2.158e-13	4.902e-07	#N/A
2	rs5837881	3.081e-12	5.345e-07	#N/A
2	rs11571316	1.148e-12	5.653e-07	CTLA4
2	rs3087243	8.749e-13	6.086e-07	CTLA4
2	rs1024161	1.633e-14	5.066e-06	#N/A
2	rs1427680	2.072e-14	8.15e-06	CTLA4
2	rs231779	1.831e-14	8.529e-06	CTLA4
2	rs231723	3.236e-14	9.247e-06	CTLA4
2	rs11571315	2.188e-14	9.432e-06	CTLA4
2	rs2352546	4.557e-09	9.774e-06	#N/A
2	rs736611	2.186e-14	9.962e-06	CTLA4
2	rs231775	1.689e-14	1.034e-05	#N/A
2	rs1991416	4.475e-09	1.054e-05	#N/A
2	rs1365965	3.522e-09	1.076e-05	#N/A
2	rs231763	1.972e-14	1.088e-05	#N/A
2	rs2882973	1.785e-09	1.269e-05	#N/A
2	rs7565213	8.52e-09	1.448e-05	CTLA4
2	rs11571302	6.59e-09	1.503e-05	CTLA4
2	rs11571297	1.317e-08	1.635e-05	#N/A
2	rs12992492	2.013e-12	1.682e-05	#N/A
2	rs4675372	2.013e-12	1.682e-05	#N/A
2	rs3116513	2.507e-12	1.687e-05	#N/A
2	rs67665411	2.027e-12	1.69e-05	#N/A
6	rs141618471	1.009e-31	2.308e-13	HLA-B
6	rs9380182	7.951e-24	1.158e-12	FLOT1
6	rs117116160	7.726e-33	1.227e-12	HCP5
6	rs9380213	7.578e-31	1.54e-12	#N/A
6	rs12524692	7.741e-29	1.761e-12	HLA-B
6	rs117884751	2.558e-32	1.762e-12	HCP5
6	rs142459005	5.976e-32	2.703e-12	AL671883.2
6	rs9380234	5.626e-21	3.448e-12	HLA-B
6	rs9357105	2.342e-31	4.313e-12	MUC22
6	rs9391714	2.901e-21	4.408e-12	HLA-B
6	rs9378228	1.704e-31	4.476e-12	HLA-B
6	rs56356836	2.388e-21	4.535e-12	HLA-B
6	rs9405016	2.388e-21	4.535e-12	HLA-B
6	rs12529015	2.388e-21	4.535e-12	HLA-B
6	rs9368669	2.388e-21	4.535e-12	HLA-B
6	rs9357121	9.242e-22	4.977e-12	HLA-B
6	rs9366775	1.429e-21	5.838e-12	HLA-B
6	rs4298345	1.638e-21	6.464e-12	HLA-B
6	rs151195028	5.74e-22	8.826e-12	DHX16
6	rs9391817	1.643e-28	1.182e-11	POU5F1
6	rs3763287	5.249e-25	1.413e-11	HCP5
6	rs9394054	7.436e-19	1.498e-11	HLA-B
6	rs9391634	7.584e-26	1.654e-11	LINC00243
6	rs143982339	1.661e-24	1.673e-11	ABCF1
6	rs9368672	3.708e-19	1.754e-11	HLA-B
6	rs6918048	3.708e-19	1.846e-11	HLA-B
6	rs9348841	2.184e-24	1.854e-11	PPP1R10
6	rs3130689	1.109e-12	2.022e-11	#N/A
6	rs28652698	3.568e-28	2.057e-11	CCHCR1
6	rs3130432	1.57e-12	2.144e-11	#N/A
6	rs3134749	1.57e-12	2.144e-11	#N/A
6	rs72860306	5.838e-28	2.162e-11	HLA-B
6	rs114985235	4.808e-19	2.189e-11	HLA-B
6	rs116589426	4.808e-19	2.189e-11	HLA-B
6	rs114151681	4.808e-19	2.189e-11	HLA-B
6	rs9380241	4.808e-19	2.189e-11	HLA-B
6	rs9380242	4.836e-19	2.189e-11	AL671883.1
6	rs3130429	1.538e-12	2.203e-11	#N/A
6	rs56244255	4.808e-19	2.243e-11	HLA-B
6	rs56334149	4.808e-19	2.243e-11	HLA-B
6	rs12526259	4.808e-19	2.243e-11	HLA-B
6	rs149308954	4.808e-19	2.243e-11	HLA-B
6	rs6913070	2.105e-30	2.248e-11	POU5F1
6	rs7761855	5e-19	2.321e-11	HLA-B
6	rs199707618	1.625e-19	2.459e-11	#N/A
6	rs3134767	1.126e-12	2.554e-11	#N/A
6	rs34891015	1.126e-12	2.554e-11	#N/A
6	rs3130409	1.126e-12	2.554e-11	#N/A
6	rs3095245	1.126e-12	2.554e-11	#N/A
6	rs2394902	1.126e-12	2.554e-11	#N/A
6	rs3134754	1.126e-12	2.554e-11	#N/A
6	rs3130417	1.126e-12	2.554e-11	#N/A
6	rs2516471	1.107e-22	2.606e-11	HCP5
6	rs117333063	8.255e-30	2.652e-11	AL662844.3
6	rs9357133	2.101e-22	2.707e-11	HCP5
6	rs4122190	6.518e-30	2.814e-11	AL662844.3
6	rs35372932	1.711e-19	2.925e-11	#N/A
6	rs200433535	1.766e-19	2.927e-11	#N/A
6	rs11751673	1.923e-19	2.986e-11	HLA-DRB1
6	rs11756331	1.923e-19	2.986e-11	HLA-DRB1
6	rs11752229	1.923e-19	2.986e-11	HLA-DRB1
6	rs11756836	1.923e-19	2.986e-11	HLA-DRB1
6	rs7749350	1.923e-19	2.986e-11	HLA-DRB1
6	rs2596466	5.155e-23	3.019e-11	HCP5
6	rs11754183	1.157e-19	3.085e-11	#N/A
6	rs28483421	3.941e-30	3.112e-11	AL662844.3
6	rs9368683	1.885e-18	3.116e-11	HLA-B
6	rs11752754	1.383e-19	3.212e-11	#N/A
6	rs9391681	3.044e-21	3.23e-11	#N/A
6	rs9380254	1.815e-22	3.255e-11	HCP5
6	rs2263323	1.228e-22	3.435e-11	HCP5
6	rs117588763	2.882e-30	3.548e-11	POU5F1
6	rs9357112	2.882e-30	3.548e-11	POU5F1
6	rs9357114	2.882e-30	3.548e-11	POU5F1
6	rs9348855	2.882e-30	3.548e-11	POU5F1
6	rs7771486	2.882e-30	3.548e-11	#N/A
6	rs7772153	4.889e-30	3.555e-11	#N/A
6	rs9405028	5.864e-19	3.952e-11	HLA-B
6	rs67494727	5.864e-19	3.952e-11	HLA-B
6	rs4713439	3.473e-30	4.104e-11	POU5F1
6	rs9405074	6.567e-19	4.144e-11	HLA-B
6	rs9405015	3.106e-30	4.35e-11	#N/A
6	rs144947541	3.106e-30	4.35e-11	#N/A
6	rs56262493	6.576e-19	4.438e-11	HLA-B
6	rs9295984	6.863e-19	4.438e-11	HLA-B
6	rs6906714	6.604e-19	4.501e-11	HLA-B
6	rs56280537	8.203e-19	4.608e-11	HLA-B
6	rs55674503	8.068e-19	4.645e-11	HLA-B
6	rs9378226	4.054e-30	4.71e-11	AL662844.4
6	rs56353634	6.584e-19	4.749e-11	HLA-B
6	rs4527750	8.687e-19	4.854e-11	HLA-B
6	rs9391841	8.687e-19	4.854e-11	HLA-B
6	rs200335735	7.585e-19	4.908e-11	HLA-B
6	rs12174571	7.768e-19	4.908e-11	HLA-B
6	rs9391719	7.768e-19	4.908e-11	HLA-B
6	rs115813673	7.902e-19	4.908e-11	HLA-B
6	rs9391774	3.289e-19	4.953e-11	HLA-B
6	rs9380181	2.976e-22	5.013e-11	ABCF1
6	rs143128695	2.976e-22	5.013e-11	ATAT1
6	rs28771426	2.844e-18	5.013e-11	HLA-B
6	rs55813549	4.343e-19	5.032e-11	HLA-B
6	rs72502563	7.768e-19	5.146e-11	HLA-B
6	rs60091015	7.768e-19	5.146e-11	HLA-B
6	rs4492231	7.768e-19	5.146e-11	HLA-B
6	rs72502564	7.768e-19	5.146e-11	HLA-B
6	rs115034963	7.768e-19	5.146e-11	HLA-B
6	rs115190576	7.768e-19	5.146e-11	HLA-B
6	rs72502565	7.768e-19	5.146e-11	HLA-B
6	rs9295982	7.819e-19	5.146e-11	HLA-B
6	rs9391641	7.891e-19	5.146e-11	HLA-B
6	rs9295980	7.891e-19	5.146e-11	HLA-B
6	rs9283890	7.891e-19	5.146e-11	HLA-B
6	rs4311503	8.304e-19	5.146e-11	HLA-B
6	rs6919058	8.49e-19	5.146e-11	HLA-B
6	rs6942380	8.49e-19	5.146e-11	HLA-B
6	rs9378155	8.49e-19	5.146e-11	HLA-B
6	rs9378156	8.49e-19	5.146e-11	HLA-B
6	rs72502566	1.273e-18	5.306e-11	HLA-B
6	rs12173768	1.273e-18	5.306e-11	HLA-B
6	rs3823363	1.232e-08	5.422e-11	HCG9
6	rs9393991	1.241e-16	5.481e-11	RF00554
6	rs3134755	1.241e-12	5.595e-11	#N/A
6	rs116685461	1.12e-18	6.018e-11	HLA-B
6	rs9405031	1.12e-18	6.018e-11	HLA-B
6	rs9391843	1.12e-18	6.018e-11	HLA-B
6	rs10807081	5.416e-20	6.157e-11	AL662844.3
6	rs9391848	3.382e-20	6.511e-11	AL671883.2
6	rs9378157	2.896e-18	6.543e-11	HLA-B
6	rs9260388	2.137e-08	6.609e-11	HLA-A
6	rs114317621	1.232e-18	7.388e-11	HLA-B
6	rs150527794	1.232e-18	7.388e-11	HLA-B
6	rs3130533	1.468e-12	7.425e-11	#N/A
6	rs2394252	2.187e-08	7.601e-11	HCG9
6	rs9380238	7.695e-14	7.736e-11	HLA-B
6	rs9394053	4.986e-19	8.45e-11	HLA-B
6	rs9348864	3.767e-19	8.512e-11	HLA-B
6	rs148136265	3.767e-19	8.512e-11	HLA-B
6	rs9368660	5.481e-30	8.725e-11	#N/A
6	rs34540685	1.602e-18	9.044e-11	HLA-B
6	rs33998388	1.602e-18	9.044e-11	HLA-B
6	rs9260034	2.172e-08	1.061e-10	AL671277.1
6	rs9260035	2.172e-08	1.061e-10	AL671277.1
6	rs9266095	2.735e-13	1.088e-10	AL671883.2
6	rs9260014	2.091e-08	1.122e-10	AL671277.1
6	rs3884198	2.091e-08	1.122e-10	AL671277.1
6	rs453325	2.091e-08	1.122e-10	AL671277.1
6	rs9280783	2.091e-08	1.122e-10	AL671277.1
6	rs451318	2.091e-08	1.122e-10	AL671277.1
6	rs9260025	2.091e-08	1.122e-10	AL671277.1
6	rs9260030	2.091e-08	1.122e-10	AL671277.1
6	rs9260031	2.091e-08	1.122e-10	AL671277.1
6	rs9260066	2.091e-08	1.122e-10	AL671277.1
6	rs9260068	2.091e-08	1.122e-10	AL671277.1
6	rs440674	2.294e-08	1.166e-10	AL671277.1
6	rs10947158	1.871e-29	1.214e-10	AL662844.1
6	rs2524279	7.649e-22	1.257e-10	HCP5
6	rs9260313	7.133e-09	1.391e-10	HLA-A
6	rs1265090	2.125e-20	1.428e-10	CCHCR1
6	rs7748472	2.56e-24	1.455e-10	#N/A
6	rs3132505	2.132e-22	1.498e-10	#N/A
6	rs3095247	1.02e-12	1.516e-10	#N/A
6	rs7748494	3.321e-24	1.563e-10	#N/A
6	rs148948227	3.559e-24	1.598e-10	HLA-DRB9
6	rs9394070	8.181e-24	1.613e-10	AL645933.2
6	rs10576068	3.507e-24	1.62e-10	#N/A
6	rs9260048	2.221e-08	1.625e-10	AL671277.1
6	rs11753780	3.559e-24	1.626e-10	HLA-DRB9
6	rs113008492	3.559e-24	1.626e-10	#N/A
6	rs9469133	3.559e-24	1.626e-10	#N/A
6	rs9469134	3.559e-24	1.626e-10	#N/A
6	rs9461758	3.559e-24	1.626e-10	#N/A
6	rs7748301	3.559e-24	1.626e-10	#N/A
6	rs9391846	2.473e-19	1.631e-10	HLA-B
6	rs4260781	1.323e-12	1.634e-10	HLA-B
6	rs9469129	3.693e-24	1.691e-10	HLA-DRB9
6	rs9469130	3.693e-24	1.691e-10	HLA-DRB9
6	rs7770920	3.508e-24	1.697e-10	HLA-DRB9
6	rs6457596	3.508e-24	1.697e-10	HLA-DRB9
6	rs111573974	3.508e-24	1.697e-10	HLA-DRB9
6	rs9469112	3.301e-26	1.714e-10	HLA-DRA
6	rs6924760	3.523e-24	1.714e-10	HLA-DRB9
6	rs9286789	3.523e-24	1.714e-10	HLA-DRB9
6	rs17203039	3.523e-24	1.714e-10	HLA-DRB9
6	rs11759730	3.523e-24	1.714e-10	HLA-DRB9
6	rs9461755	3.523e-24	1.714e-10	HLA-DRB9
6	rs9461756	3.523e-24	1.714e-10	HLA-DRB9
6	rs2071805	3.523e-24	1.714e-10	HLA-DRB9
6	rs61550563	3.523e-24	1.714e-10	HLA-DRB9
6	rs17209754	3.523e-24	1.714e-10	HLA-DRB9
6	rs17209768	3.523e-24	1.714e-10	HLA-DRB9
6	rs17203430	3.523e-24	1.714e-10	HLA-DRB9
6	rs17203444	3.523e-24	1.714e-10	HLA-DRB9
6	rs17209803	3.523e-24	1.714e-10	HLA-DRB9
6	rs17203458	3.523e-24	1.714e-10	HLA-DRB9
6	rs117565607	4.478e-17	1.774e-10	TRIM26
6	rs9260260	2.024e-08	1.795e-10	AL671277.1
6	rs9391720	6.933e-13	2.083e-10	HLA-B
6	rs9260044	3.118e-08	2.122e-10	AL671277.1
6	rs9260257	2.571e-08	2.188e-10	AL671277.1
6	rs9380151	2.632e-17	2.421e-10	ZNRD1ASP
6	rs73729294	6.368e-24	2.465e-10	HLA-DRB9
6	rs146363103	4.97e-30	2.531e-10	#N/A
6	rs9380226	4.97e-30	2.531e-10	#N/A
6	rs1639106	3.367e-30	2.581e-10	#N/A
6	rs2239888	2.421e-11	2.68e-10	PPP1R18
6	rs9469120	6.384e-24	2.717e-10	HLA-DRB9
6	rs3132506	1.09e-22	2.874e-10	HCG27
6	rs115566240	1.682e-17	3.041e-10	HLA-DQA1
6	rs2523623	1.039e-12	3.105e-10	HLA-B
6	rs5021845	1.09e-12	3.105e-10	HLA-B
6	rs28771425	1.084e-12	3.338e-10	HLA-B
6	rs3134785	2.47e-22	3.397e-10	#N/A
6	rs9357117	4.998e-30	3.435e-10	#N/A
6	rs114202986	4.604e-24	3.452e-10	HCP5
6	rs28771421	5.074e-13	3.522e-10	HLA-B
6	rs3763288	5.038e-24	3.875e-10	HCP5
6	rs1265082	1.835e-20	4.211e-10	CCHCR1
6	rs1265113	1.835e-20	4.211e-10	CCHCR1
6	rs1265107	2.399e-20	4.296e-10	CCHCR1
6	rs1265110	2.482e-20	4.296e-10	CCHCR1
6	rs1634769	1.557e-12	4.662e-10	HLA-B
6	rs9368662	8.239e-16	4.836e-10	#N/A
6	rs117416277	1.985e-17	5.074e-10	AL662795.2
6	rs17205191	1.461e-17	5.2e-10	HLA-DQA1
6	rs1265163	1.989e-20	5.252e-10	POU5F1
6	rs9368655	2.096e-16	5.317e-10	#N/A
6	rs3130949	1.4e-22	5.382e-10	AL662844.1
6	rs1655901	1.557e-09	5.483e-10	HLA-A
6	rs6912893	5.233e-17	5.519e-10	HLA-B
6	rs1265160	7.056e-21	5.584e-10	POU5F1
6	rs143804865	9.105e-11	5.817e-10	AL662797.1
6	rs34467061	1.215e-15	5.994e-10	AL662844.3
6	rs34075705	2.944e-15	6.029e-10	AL662844.3
6	rs9391724	1.438e-20	6.326e-10	AL671883.2
6	rs28383832	1.703e-20	6.47e-10	CCHCR1
6	rs9394049	7.427e-18	6.497e-10	HLA-B
6	rs12234123	4.817e-18	6.773e-10	HLA-B
6	rs4122189	4.525e-16	7.091e-10	AL662844.3
6	rs9366769	5.962e-16	7.116e-10	AL662844.3
6	rs28397285	5.5e-16	7.137e-10	AL662844.3
6	rs12524487	1.091e-23	7.226e-10	HLA-S
6	rs3130514	1.047e-21	7.322e-10	#N/A
6	rs6919086	7.273e-19	7.331e-10	HLA-B
6	rs2394250	3.653e-08	7.38e-10	HCG9
6	rs117474927	4.241e-12	7.487e-10	ABCF1
6	rs28360064	4.875e-16	7.546e-10	AL662844.4
6	rs6919310	8.717e-18	7.843e-10	HLA-B
6	rs9391715	8.717e-18	7.843e-10	HLA-B
6	rs28397274	8.461e-16	7.968e-10	AL662844.3
6	rs28360065	9.02e-16	8.39e-10	AL662844.3
6	rs28360066	9.02e-16	8.39e-10	AL662844.3
6	rs28397268	9.02e-16	8.39e-10	AL662844.3
6	rs9266094	1.789e-15	8.522e-10	AL671883.2
6	rs6922077	9.1e-16	8.559e-10	AL662844.3
6	rs6901685	9.1e-16	8.559e-10	AL662844.3
6	rs6922553	9.1e-16	8.559e-10	AL662844.3
6	rs6922756	9.1e-16	8.559e-10	AL662844.3
6	rs28397271	9.1e-16	8.559e-10	AL662844.3
6	rs28397272	9.1e-16	8.559e-10	AL662844.3
6	rs28397273	9.1e-16	8.559e-10	AL662844.3
6	rs35585151	1.476e-17	8.826e-10	HLA-DQA1
6	rs6922744	5.947e-16	8.958e-10	AL662844.3
6	rs6922729	5.947e-16	8.958e-10	AL662844.3
6	rs28397282	4.406e-16	9.336e-10	AL662844.3
6	rs9357124	2.573e-18	9.395e-10	AL671883.1
6	rs2394907	5.426e-11	9.469e-10	#N/A
6	rs9368677	2.889e-18	9.518e-10	AL671883.1
6	rs28397270	6.403e-16	9.635e-10	AL662844.3
6	rs9295960	8.677e-16	9.678e-10	AL662844.3
6	rs9391819	8.677e-16	9.678e-10	AL662844.3
6	rs28771422	4.889e-13	9.861e-10	HLA-B
6	rs6899874	9.244e-16	1.011e-09	AL662844.4
6	rs9394042	9.244e-16	1.011e-09	AL662844.3
6	rs11381232	9.244e-16	1.011e-09	AL662844.3
6	rs9380223	9.244e-16	1.011e-09	AL662844.3
6	rs28367586	6.765e-18	1.026e-09	HLA-B
6	rs6921663	4.673e-16	1.078e-09	#N/A
6	rs9394050	6.738e-18	1.087e-09	HLA-B
6	rs9380235	6.061e-18	1.115e-09	HLA-B
6	rs9380232	7.208e-18	1.122e-09	HLA-B
6	rs9295968	7.208e-18	1.122e-09	HLA-B
6	rs28380922	4.752e-13	1.122e-09	HLA-B
6	rs1611627	7.292e-11	1.122e-09	HCG4P8
6	rs1633097	6.705e-11	1.123e-09	MICG
6	rs9394024	3.703e-23	1.169e-09	#N/A
6	rs9380222	1.448e-15	1.176e-09	AL662844.3
6	rs773337328	3.494e-20	1.279e-09	#N/A
6	rs9689836	4.98e-20	1.285e-09	#N/A
6	rs9689437	4.98e-20	1.285e-09	#N/A
6	rs6899875	2.009e-15	1.285e-09	#N/A
6	rs71542417	5.188e-20	1.292e-09	#N/A
6	rs74729707	5.267e-20	1.292e-09	#N/A
6	rs9394048	8.947e-18	1.292e-09	HLA-B
6	rs9368663	7.098e-16	1.297e-09	#N/A
6	rs9391723	4.474e-13	1.322e-09	HLA-B
6	rs28380921	4.474e-13	1.322e-09	HLA-B
6	chr6:31275465_G_GA	7.534e-18	1.332e-09	#N/A
6	rs12528622	1.707e-14	1.362e-09	#N/A
6	rs112927854	1.707e-14	1.362e-09	#N/A
6	rs68067315	1.707e-14	1.362e-09	#N/A
6	rs13191875	1.707e-14	1.362e-09	#N/A
6	rs13206007	1.707e-14	1.362e-09	#N/A
6	rs13206018	1.707e-14	1.362e-09	#N/A
6	rs17427431	1.707e-14	1.381e-09	#N/A
6	rs35656734	1.333e-17	1.407e-09	HLA-DQA1
6	rs2394895	5.424e-22	1.431e-09	#N/A
6	rs28563838	7.631e-18	1.451e-09	HLA-B
6	rs10947315	2.877e-20	1.466e-09	#N/A
6	rs28397275	3.335e-15	1.467e-09	AL662844.3
6	rs35122881	1.707e-14	1.496e-09	#N/A
6	rs3130424	1.772e-22	1.523e-09	#N/A
6	rs3130530	2.599e-22	1.523e-09	#N/A
6	rs2394894	2.599e-22	1.523e-09	#N/A
6	rs3132495	2.599e-22	1.523e-09	#N/A
6	rs28397276	3.583e-15	1.576e-09	AL662844.3
6	rs9391712	3.583e-15	1.576e-09	AL662844.3
6	rs28600230	2.76e-18	1.586e-09	AL671883.1
6	rs9295958	3.146e-15	1.62e-09	AL662844.4
6	rs3132515	3.065e-22	1.665e-09	#N/A
6	rs11757382	5.008e-19	1.683e-09	#N/A
6	rs6938928	5.008e-19	1.683e-09	#N/A
6	rs6938929	5.008e-19	1.683e-09	#N/A
6	rs34102154	5.008e-19	1.683e-09	#N/A
6	rs4713442	2.264e-15	1.684e-09	#N/A
6	rs28360056	2.264e-15	1.684e-09	#N/A
6	rs9357115	2.373e-15	1.684e-09	#N/A
6	rs9378115	2.373e-15	1.684e-09	#N/A
6	rs2760988	2.849e-19	1.705e-09	#N/A
6	rs3134762	1.957e-22	1.71e-09	#N/A
6	rs28360067	3.652e-15	1.802e-09	AL662844.3
6	rs7755702	3.412e-15	1.839e-09	AL662844.4
6	rs28360060	3.69e-15	1.839e-09	AL662844.4
6	rs28360062	3.69e-15	1.839e-09	AL662844.4
6	rs28360063	3.69e-15	1.839e-09	AL662844.4
6	rs6936474	3.69e-15	1.839e-09	AL662844.4
6	rs6936597	3.69e-15	1.839e-09	AL662844.4
6	rs6941912	3.69e-15	1.839e-09	AL662844.4
6	rs28397286	3.69e-15	1.839e-09	AL662844.3
6	rs9265940	5.958e-13	1.92e-09	HLA-B
6	rs1633095	3.857e-11	1.943e-09	MICG
6	rs9270869	4.846e-19	1.97e-09	#N/A
6	rs9405025	1.083e-18	2.011e-09	HLA-B
6	rs12525626	5.459e-18	2.013e-09	HLA-B
6	chr6:31436393_A_AT	1.107e-22	2.056e-09	#N/A
6	rs1633075	4.465e-11	2.083e-09	#N/A
6	rs4713441	2.565e-15	2.09e-09	#N/A
6	rs28360055	2.565e-15	2.09e-09	#N/A
6	rs9391834	4.367e-18	2.121e-09	HLA-B
6	rs9405076	4.367e-18	2.121e-09	HLA-B
6	rs2394886	1.463e-22	2.132e-09	AL662844.1
6	rs9378199	1.728e-18	2.218e-09	HLA-B
6	rs9357113	1.403e-15	2.219e-09	POU5F1
6	rs9380221	1.403e-15	2.219e-09	POU5F1
6	rs60478274	3.149e-08	2.246e-09	HLA-W
6	rs9357109	2.591e-15	2.248e-09	POU5F1
6	rs2517689	5.003e-08	2.332e-09	HLA-W
6	rs9348874	8.495e-24	2.458e-09	AL663061.1
6	rs9405073	6.416e-18	2.532e-09	HLA-B
6	rs2524075	4.443e-18	2.583e-09	HLA-B
6	rs2523624	1.91e-09	2.594e-09	HLA-B
6	rs3130696	4.872e-18	2.64e-09	HLA-B
6	rs6930660	2.468e-17	2.685e-09	AL671883.1
6	rs9391818	6.76e-15	2.74e-09	#N/A
6	rs2844670	1.207e-13	2.757e-09	MUC22
6	rs915660	2.075e-15	2.855e-09	POU5F1
6	rs2517683	1.67e-08	2.886e-09	#N/A
6	rs200983150	7.426e-19	2.951e-09	HLA-B
6	rs200291258	7.426e-19	2.951e-09	HLA-B
6	rs1052989	1.915e-15	2.989e-09	POU5F1
6	rs2596521	2.161e-09	3.018e-09	HLA-B
6	rs9380220	2.151e-15	3.152e-09	POU5F1
6	rs1628628	3.99e-11	3.249e-09	HCG4P8
6	rs117295261	2.295e-23	3.29e-09	MUCL3
6	rs11967629	2.03e-15	3.477e-09	POU5F1
6	rs2848709	5.637e-22	3.513e-09	HCP5
6	rs2524280	1.18e-19	3.523e-09	HCP5
6	rs9368611	2.8e-18	3.599e-09	#N/A
6	rs1611185	5.653e-11	3.65e-09	HLA-P
6	rs11507945	2.517e-15	3.716e-09	POU5F1
6	rs9260026	9.235e-09	4.099e-09	AL671277.1
6	rs9260041	9.235e-09	4.099e-09	AL671277.1
6	rs402850	9.235e-09	4.099e-09	AL671277.1
6	rs78179089	9.235e-09	4.099e-09	AL671277.1
6	rs2853923	3.391e-14	4.272e-09	HLA-B
6	rs9260060	8.838e-09	4.606e-09	AL671277.1
6	rs9260061	8.838e-09	4.606e-09	AL671277.1
6	rs1633105	1.215e-10	4.628e-09	MICG
6	rs3819683	1.39e-26	4.828e-09	CDSN
6	rs1610706	1.255e-10	4.911e-09	MICG
6	rs1610705	1.197e-10	4.961e-09	MICG
6	rs1736956	1.197e-10	4.961e-09	MICG
6	rs1077997	1.197e-10	4.961e-09	MICG
6	rs9357123	3.206e-14	5.068e-09	HLA-B
6	rs9265961	3.393e-11	5.083e-09	HLA-B
6	rs9260809	3.318e-09	5.857e-09	HCG9
6	rs3893463	2.572e-09	5.859e-09	MICD
6	rs77332307	2.026e-15	6.674e-09	HLA-DRB9
6	rs1476570	1.313e-08	7.802e-09	#N/A
6	rs2233972	4.701e-21	8.37e-09	C6orf15
6	rs11752428	8.398e-21	8.53e-09	#N/A
6	rs11757500	8.398e-21	8.53e-09	#N/A
6	rs11752955	8.398e-21	8.53e-09	#N/A
6	rs2517887	2.137e-08	8.884e-09	#N/A
6	rs2523777	1.788e-08	9.582e-09	#N/A
6	rs76187645	1.904e-22	9.759e-09	HLA-DRB9
6	rs9501639	2.036e-22	1.009e-08	HLA-DRB9
6	rs35593555	1.211e-09	1.079e-08	#N/A
6	rs3130534	1.236e-09	1.079e-08	#N/A
6	rs2735008	8.792e-09	1.14e-08	#N/A
6	rs3129718	1.098e-13	1.27e-08	#N/A
6	rs139460958	2.817e-18	1.278e-08	#N/A
6	rs2735014	1.846e-08	1.312e-08	#N/A
6	rs2735019	1.827e-08	1.335e-08	HLA-G
6	rs2735011	1.827e-08	1.335e-08	#N/A
6	rs2735009	1.827e-08	1.335e-08	#N/A
6	rs2735004	1.827e-08	1.335e-08	#N/A
6	rs58551057	1.827e-08	1.335e-08	#N/A
6	rs2735003	1.827e-08	1.335e-08	#N/A
6	rs28565959	1.827e-08	1.335e-08	#N/A
6	rs9258538	1.827e-08	1.335e-08	#N/A
6	rs9280720	1.827e-08	1.335e-08	#N/A
6	rs2523774	1.827e-08	1.335e-08	#N/A
6	rs2734996	1.827e-08	1.335e-08	#N/A
6	rs2743937	2.149e-08	1.335e-08	#N/A
6	rs2523793	1.726e-08	1.346e-08	HLA-G
6	rs2517890	1.858e-08	1.346e-08	HLA-G
6	rs2517886	1.71e-08	1.359e-08	#N/A
6	rs2523773	2.243e-08	1.366e-08	#N/A
6	rs2735006	2.1e-08	1.367e-08	#N/A
6	rs369095149	2.545e-18	1.387e-08	#N/A
6	rs9348862	2.61e-14	1.417e-08	HLA-B
6	rs9391847	3.096e-10	1.419e-08	AL671883.2
6	rs9366776	1.817e-14	1.434e-08	HLA-B
6	rs6921855	2.273e-14	1.434e-08	HLA-B
6	rs6899660	2.273e-14	1.434e-08	HLA-B
6	rs9348860	2.273e-14	1.434e-08	HLA-B
6	rs9348861	2.273e-14	1.434e-08	HLA-B
6	rs9368670	2.273e-14	1.434e-08	HLA-B
6	rs76141334	2.273e-14	1.434e-08	HLA-B
6	rs72861464	2.273e-14	1.434e-08	HLA-B
6	rs72861465	2.273e-14	1.434e-08	HLA-B
6	rs17198727	2.273e-14	1.434e-08	HLA-B
6	rs10947169	2.273e-14	1.434e-08	HLA-B
6	rs6939681	2.273e-14	1.434e-08	HLA-B
6	rs9357122	2.273e-14	1.434e-08	HLA-B
6	rs9394051	2.273e-14	1.434e-08	HLA-B
6	rs9394052	2.273e-14	1.434e-08	HLA-B
6	rs9295969	2.273e-14	1.434e-08	HLA-B
6	rs3873381	2.273e-14	1.434e-08	HLA-B
6	rs9380236	2.273e-14	1.449e-08	HLA-B
6	rs3873377	1.761e-14	1.456e-08	HLA-B
6	rs6916525	2.348e-14	1.464e-08	HLA-B
6	rs75791723	2.388e-16	1.478e-08	AL645939.4
6	rs9368671	2.726e-14	1.501e-08	HLA-B
6	rs16899147	1.178e-14	1.515e-08	HLA-B
6	rs185093297	1.834e-18	1.541e-08	#N/A
6	rs113356849	4.505e-13	1.61e-08	AL662789.1
6	rs3873382	2.766e-14	1.65e-08	HLA-B
6	rs9348863	3.218e-14	1.657e-08	HLA-B
6	rs2734998	1.735e-08	1.668e-08	#N/A
6	rs145570027	1.645e-18	1.67e-08	#N/A
6	rs2523684	2.075e-19	1.749e-08	AL645933.1
6	rs9501641	8.667e-17	1.801e-08	#N/A
6	rs9378152	1.131e-20	1.818e-08	#N/A
6	rs9258537	1.797e-08	1.826e-08	#N/A
6	rs4397267	3.026e-16	1.867e-08	HLA-B
6	rs9469126	1.298e-17	1.898e-08	HLA-DRB9
6	rs373939101	1.302e-17	1.912e-08	HLA-DRB9
6	rs189964538	1.302e-17	1.912e-08	HLA-DRB9
6	rs112918734	2.706e-14	1.916e-08	#N/A
6	rs16822660	1.358e-22	1.942e-08	HLA-DRA
6	rs375217182	1.825e-16	1.951e-08	HLA-DQB1
6	rs9357135	1.466e-25	1.962e-08	LST1
6	rs9366783	4.148e-17	1.976e-08	HCP5
6	rs12174396	4.482e-17	1.976e-08	HCP5
6	rs112802378	2.969e-14	2.023e-08	MTCO3P1
6	rs116953562	2.969e-14	2.023e-08	MTCO3P1
6	rs114931041	2.969e-14	2.023e-08	MTCO3P1
6	rs116823632	2.969e-14	2.023e-08	MTCO3P1
6	rs200518968	2.969e-14	2.023e-08	MTCO3P1
6	rs112057165	2.969e-14	2.023e-08	MTCO3P1
6	rs112941700	2.969e-14	2.023e-08	MTCO3P1
6	rs113556552	2.969e-14	2.023e-08	MTCO3P1
6	rs113413656	2.969e-14	2.023e-08	MTCO3P1
6	rs113239320	2.969e-14	2.023e-08	#N/A
6	rs547480736	2.992e-14	2.023e-08	MTCO3P1
6	rs112678772	2.992e-14	2.047e-08	MTCO3P1
6	rs117736824	2.992e-14	2.047e-08	MTCO3P1
6	rs113738873	2.992e-14	2.047e-08	MTCO3P1
6	rs112947282	2.992e-14	2.047e-08	MTCO3P1
6	rs113380489	2.992e-14	2.047e-08	MTCO3P1
6	rs112512026	2.992e-14	2.047e-08	MTCO3P1
6	rs117392376	2.992e-14	2.047e-08	MTCO3P1
6	rs113919826	3.03e-14	2.047e-08	MTCO3P1
6	rs111808493	3.03e-14	2.047e-08	MTCO3P1
6	rs112919014	2.992e-14	2.052e-08	#N/A
6	rs112366663	2.992e-14	2.052e-08	#N/A
6	rs112825165	2.992e-14	2.052e-08	#N/A
6	rs112283910	2.992e-14	2.052e-08	#N/A
6	rs115595864	2.992e-14	2.052e-08	#N/A
6	rs115080293	2.992e-14	2.052e-08	#N/A
6	rs112289364	2.992e-14	2.052e-08	#N/A
6	rs113488175	2.992e-14	2.052e-08	#N/A
6	rs114265258	2.992e-14	2.052e-08	#N/A
6	rs112473439	2.992e-14	2.052e-08	#N/A
6	rs113362556	2.992e-14	2.052e-08	#N/A
6	rs1165567641	2.992e-14	2.052e-08	#N/A
6	rs1265612703	2.992e-14	2.052e-08	#N/A
6	rs111328907	2.992e-14	2.052e-08	#N/A
6	rs113846532	2.992e-14	2.052e-08	#N/A
6	rs111771687	2.992e-14	2.052e-08	#N/A
6	rs112837888	2.992e-14	2.052e-08	#N/A
6	rs113639666	2.992e-14	2.052e-08	#N/A
6	rs199677907	2.992e-14	2.052e-08	#N/A
6	rs111684284	2.992e-14	2.052e-08	#N/A
6	rs116474044	2.992e-14	2.052e-08	#N/A
6	rs142700936	2.992e-14	2.052e-08	#N/A
6	rs150369468	2.992e-14	2.052e-08	#N/A
6	rs113180107	2.992e-14	2.052e-08	#N/A
6	rs112643393	2.992e-14	2.052e-08	#N/A
6	rs111940765	2.992e-14	2.052e-08	#N/A
6	rs113404909	2.992e-14	2.052e-08	#N/A
6	rs112205942	2.992e-14	2.052e-08	#N/A
6	rs112576294	2.992e-14	2.052e-08	#N/A
6	rs75786451	2.992e-14	2.052e-08	#N/A
6	rs75444829	2.992e-14	2.052e-08	#N/A
6	rs76175267	2.992e-14	2.052e-08	#N/A
6	rs141860709	2.992e-14	2.052e-08	#N/A
6	rs112767544	2.992e-14	2.052e-08	#N/A
6	rs140055405	2.992e-14	2.052e-08	#N/A
6	rs112495399	2.992e-14	2.052e-08	#N/A
6	rs112394065	2.992e-14	2.052e-08	#N/A
6	rs111929630	2.992e-14	2.052e-08	#N/A
6	rs113853932	2.992e-14	2.052e-08	#N/A
6	rs116436080	2.992e-14	2.052e-08	#N/A
6	rs111258791	2.992e-14	2.052e-08	#N/A
6	rs111952567	2.992e-14	2.052e-08	#N/A
6	rs113702169	2.992e-14	2.052e-08	#N/A
6	rs115072775	2.992e-14	2.052e-08	#N/A
6	rs116552012	2.992e-14	2.052e-08	#N/A
6	rs113166495	2.992e-14	2.052e-08	#N/A
6	rs112230901	2.992e-14	2.052e-08	#N/A
6	rs149087871	2.992e-14	2.052e-08	#N/A
6	rs55974168	2.992e-14	2.052e-08	#N/A
6	rs113201741	3.101e-14	2.052e-08	#N/A
6	rs112097452	3.101e-14	2.052e-08	#N/A
6	rs199961461	3.101e-14	2.052e-08	#N/A
6	rs763185831	3.101e-14	2.052e-08	#N/A
6	rs112179735	3.101e-14	2.052e-08	#N/A
6	rs73405373	3.101e-14	2.052e-08	#N/A
6	rs114462637	3.101e-14	2.052e-08	#N/A
6	rs1275509449	3.101e-14	2.052e-08	#N/A
6	rs113542246	3.101e-14	2.052e-08	#N/A
6	rs111413563	3.101e-14	2.052e-08	#N/A
6	rs72861484	3.3e-14	2.067e-08	HLA-B
6	rs113467005	2.992e-14	2.082e-08	#N/A
6	rs1242150872	2.992e-14	2.082e-08	#N/A
6	rs112679091	2.992e-14	2.082e-08	MTCO3P1
6	rs112984203	2.984e-14	2.107e-08	#N/A
6	rs9263869	1.732e-12	2.226e-08	AL662844.3
6	rs111670117	1.686e-14	2.239e-08	#N/A
6	rs28533694	4.322e-13	2.28e-08	#N/A
6	rs111723134	1.955e-14	2.329e-08	#N/A
6	rs115719910	1.955e-14	2.329e-08	#N/A
6	rs113186560	1.955e-14	2.329e-08	#N/A
6	rs112037412	1.955e-14	2.329e-08	AL662789.1
6	rs111495201	1.955e-14	2.329e-08	AL662789.1
6	rs73396625	1.955e-14	2.329e-08	AL662789.1
6	rs1634774	2.354e-08	2.33e-08	HLA-B
6	rs142774403	1.555e-17	2.335e-08	HLA-DRB9
6	rs12173764	1.873e-16	2.347e-08	HLA-B
6	rs73407315	3.032e-14	2.353e-08	#N/A
6	rs371013749	3.52e-18	2.478e-08	DDR1
6	rs202093441	2.531e-14	2.532e-08	#N/A
6	rs4637682	1.854e-16	2.563e-08	HLA-B
6	rs112669309	1.816e-14	2.566e-08	#N/A
6	rs375407646	8.601e-14	2.65e-08	AL662789.1
6	rs2735000	2.066e-08	2.832e-08	#N/A
6	rs59406271	2.067e-17	2.919e-08	HLA-DRB9
6	rs115135952	2.244e-14	2.975e-08	#N/A
6	rs181534481	2.135e-17	3.042e-08	HLA-DQA1
6	rs112044727	1.272e-13	3.327e-08	#N/A
6	rs17615141	2.269e-14	3.346e-08	MTCO3P1
6	rs585669	5.676e-16	3.39e-08	#N/A
6	rs1047074669	4.921e-14	3.43e-08	#N/A
6	rs1186034433	4.921e-14	3.43e-08	#N/A
6	rs17581061	2.455e-14	3.552e-08	#N/A
6	rs371087333	4.079e-14	3.568e-08	#N/A
6	rs17206287	2.182e-17	4.175e-08	MTCO3P1
6	rs2442719	2.009e-12	4.428e-08	AL671883.2
6	rs447903	3.457e-11	4.598e-08	NOTCH4
6	rs387071	2.652e-11	4.808e-08	NOTCH4
6	rs9366777	6.814e-14	5.171e-08	HLA-B
6	rs370055	3.642e-11	5.219e-08	NOTCH4
6	rs499691	3.642e-11	5.219e-08	NOTCH4
6	rs9366785	8.347e-19	5.344e-08	BAG6
6	rs150971595	1.377e-17	5.386e-08	GABBR1
6	rs12665401	7.538e-10	5.594e-08	AL645939.2
6	rs67164457	7.202e-09	6.201e-08	#N/A
6	rs113154049	1.738e-13	6.32e-08	#N/A
6	rs28362611	1.328e-18	6.555e-08	DDR1
6	rs9348844	8.503e-18	6.756e-08	LINC00243
6	rs112745211	4.428e-14	6.869e-08	#N/A
6	rs2286654	1.866e-18	7.041e-08	MUCL3
6	rs9391637	1.721e-18	8.078e-08	HCG21
6	rs12174433	1.004e-15	8.457e-08	#N/A
6	rs199812614	3.166e-13	8.811e-08	#N/A
6	rs139299944	2.909e-10	9.576e-08	HLA-DQA1
6	rs9405083	2.447e-09	9.748e-08	AL671883.2
6	rs112116290	3.732e-14	1.002e-07	#N/A
6	chr6:32628785_G_GATAGGTTATAGTTCAATATTCCATTTTTATTCAATCTGTTCTTCTCT	9.215e-16	1.021e-07	#N/A
6	rs686250	1.928e-12	1.066e-07	#N/A
6	rs1554135881	1.069e-14	1.076e-07	#N/A
6	rs12176594	7.635e-16	1.237e-07	SUCLA2P1
6	rs77072171	7.635e-16	1.237e-07	SUCLA2P1
6	rs9404933	7.635e-16	1.237e-07	#N/A
6	rs74223639	7.635e-16	1.237e-07	#N/A
6	rs2266161	2.986e-19	1.249e-07	HCP5
6	rs9368647	3.079e-18	1.266e-07	HCG21
6	rs4389802	3.37e-11	1.289e-07	TSBP1
6	rs9268314	4.729e-11	1.398e-07	TSBP1
6	rs1474727	5.219e-11	1.401e-07	TSBP1
6	rs9368648	1.27e-18	1.413e-07	HCG21
6	rs910050	4.075e-11	1.448e-07	RNU6-603P
6	rs6902805	1.727e-14	1.452e-07	NOTCH4
6	rs2076537	3.111e-11	1.5e-07	RNU6-603P
6	rs3117134	3.499e-11	1.5e-07	TSBP1
6	rs4711250	1.963e-18	1.536e-07	NAPGP2
6	rs9469113	2.495e-21	1.551e-07	HLA-DRA
6	rs9263875	7.361e-12	1.574e-07	AL662844.3
6	rs139336381	4.114e-18	1.632e-07	ABHD16A
6	rs7753335	1.152e-14	1.632e-07	HLA-DRB1
6	rs11756119	1.28e-14	1.632e-07	#N/A
6	rs9296012	1.466e-14	1.699e-07	NOTCH4
6	rs9501633	2.686e-21	1.711e-07	#N/A
6	rs112794667	2.686e-21	1.711e-07	#N/A
6	rs56083136	2.686e-21	1.711e-07	HLA-DRB9
6	rs9501640	2.686e-21	1.711e-07	HLA-DRB9
6	rs11756633	1.16e-14	1.717e-07	#N/A
6	rs35820711	1.176e-14	1.717e-07	#N/A
6	rs6907322	3.493e-11	1.75e-07	RNU6-603P
6	rs3131921	6.725e-15	1.782e-07	MUCL3
6	rs117589205	2.661e-16	1.803e-07	LINC02570
6	rs3129902	4.652e-11	1.812e-07	TSBP1
6	rs3117136	4.652e-11	1.812e-07	TSBP1
6	rs7383143	4.652e-11	1.812e-07	TSBP1
6	rs9281746	4.652e-11	1.812e-07	TSBP1
6	rs2395147	4.652e-11	1.812e-07	TSBP1
6	rs3117131	4.652e-11	1.812e-07	TSBP1
6	rs969891	4.652e-11	1.812e-07	RNU6-603P
6	rs3117121	4.652e-11	1.812e-07	RNU6-603P
6	rs3117120	4.652e-11	1.812e-07	RNU6-603P
6	rs2076539	4.652e-11	1.812e-07	RNU6-603P
6	rs3117122	3.979e-11	1.813e-07	RNU6-603P
6	rs885950	5.871e-12	1.836e-07	POU5F1
6	rs1265763	2.845e-11	1.898e-07	RNU6-603P
6	rs969893	2.239e-11	1.902e-07	RNU6-603P
6	rs9268303	2.936e-11	1.912e-07	TSBP1
6	rs12194291	1.682e-13	1.921e-07	HCG4P8
6	rs9265953	8.813e-10	1.923e-07	HLA-B
6	rs4711248	4.362e-18	1.93e-07	MUCL3
6	rs9268302	2.988e-11	1.944e-07	RNU6-603P
6	rs9295937	1.907e-18	1.953e-07	NAPGP2
6	rs9265951	8.557e-10	1.961e-07	HLA-B
6	rs16897572	7.874e-13	1.963e-07	HLA-E
6	rs1076712	3.308e-11	1.967e-07	TSBP1
6	rs9268361	2.889e-11	2.016e-07	TSBP1
6	rs6917075	1.525e-11	2.023e-07	TSBP1
6	rs1265100	6.238e-14	2.026e-07	CCHCR1
6	rs9268315	7.451e-11	2.105e-07	TSBP1
6	rs118097312	1.838e-18	2.171e-07	C2
6	rs35286068	4.187e-21	2.184e-07	HLA-DRB9
6	rs3117130	1.503e-10	2.184e-07	TSBP1
6	rs2223638	3.348e-11	2.303e-07	RNU6-603P
6	rs6930477	3.348e-11	2.303e-07	RNU6-603P
6	rs9268330	3.348e-11	2.303e-07	TSBP1
6	rs6415129	3.348e-11	2.303e-07	TSBP1
6	rs9268350	3.348e-11	2.303e-07	TSBP1
6	rs9268364	3.348e-11	2.303e-07	TSBP1
6	rs9268367	3.348e-11	2.303e-07	TSBP1
6	rs2394447	3.144e-17	2.307e-07	#N/A
6	rs10947290	2.299e-11	2.368e-07	HLA-DRB9
6	rs6907226	2.591e-11	2.409e-07	RNU6-603P
6	rs6149518	3.383e-11	2.428e-07	RNU6-603P
6	rs9268347	2.797e-11	2.486e-07	TSBP1
6	rs4361609	1.931e-15	2.503e-07	HLA-B
6	rs9268378	3.323e-11	2.511e-07	TSBP1
6	rs6903816	3.323e-11	2.511e-07	TSBP1
6	rs1967437	3.323e-11	2.511e-07	TSBP1
6	chr6:32356723_G_GA	3.056e-11	2.757e-07	#N/A
6	rs9501073	5.749e-12	2.79e-07	AL662844.3
6	rs9268365	3.611e-11	2.799e-07	TSBP1
6	rs2285793	7.565e-11	2.819e-07	AL662860.1
6	rs9268356	4.137e-11	3.024e-07	TSBP1
6	rs34065360	6.129e-19	3.041e-07	#N/A
6	rs7744155	6.881e-11	3.085e-07	TSBP1
6	rs1265095	4.048e-10	3.157e-07	CCHCR1
6	rs9268325	3.182e-10	3.257e-07	TSBP1
6	rs7741829	6.234e-12	3.294e-07	AL662844.4
6	rs117133761	1.442e-17	3.33e-07	RF00019
6	rs9263847	1.286e-08	3.358e-07	#N/A
6	rs9378150	3.929e-16	3.466e-07	DDR1
6	rs9404935	2.086e-16	3.593e-07	DDR1
6	rs4713457	1.65e-12	3.617e-07	HLA-B
6	rs151115972	8.989e-18	3.63e-07	CLIC1
6	rs71918165	8.473e-11	3.703e-07	TSBP1
6	rs9368645	2.388e-16	3.779e-07	DDR1
6	rs9263449	1.085e-17	3.935e-07	#N/A
6	rs1265074	3.181e-15	3.947e-07	CCHCR1
6	rs34298056	5.492e-11	4.012e-07	RNU6-603P
6	rs3130453	3.575e-12	4.015e-07	CCHCR1
6	rs9468882	5.172e-12	4.016e-07	POU5F1
6	rs7753892	5.172e-12	4.016e-07	#N/A
6	rs1265068	3.865e-15	4.111e-07	CCHCR1
6	rs71732848	4.129e-18	4.328e-07	HCG21
6	rs9262622	1.136e-17	4.359e-07	HCG22
6	rs3869091	1.958e-16	4.385e-07	VARS2
6	rs9357103	1.958e-16	4.385e-07	VARS2
6	rs2844634	1.969e-14	4.393e-07	PSORS1C1
6	rs9262642	1.075e-17	4.47e-07	HCG22
6	rs118062293	9.955e-18	4.493e-07	AL662899.1
6	rs9366762	2.767e-16	4.654e-07	DDR1
6	rs130067	4.983e-15	4.66e-07	CCHCR1
6	rs1265089	3.186e-15	4.687e-07	CCHCR1
6	rs9262636	7.515e-18	4.832e-07	HCG22
6	rs9262638	7.515e-18	4.832e-07	HCG22
6	rs9262639	7.515e-18	4.832e-07	HCG22
6	rs9262648	7.515e-18	4.832e-07	HCG22
6	rs9262616	1.812e-17	4.832e-07	HCG22
6	rs9262654	7.673e-18	4.862e-07	HCG22
6	rs6918904	7.673e-18	4.862e-07	#N/A
6	rs1966	4.233e-15	4.864e-07	CCHCR1
6	rs9262618	1.119e-17	4.874e-07	HCG22
6	rs9262620	1.119e-17	4.874e-07	HCG22
6	rs9262633	1.119e-17	4.874e-07	HCG22
6	rs9262635	1.119e-17	4.874e-07	HCG22
6	rs9262637	1.119e-17	4.874e-07	HCG22
6	rs9262640	1.119e-17	4.874e-07	HCG22
6	rs9262641	1.119e-17	4.874e-07	HCG22
6	rs7741049	1.119e-17	4.874e-07	HCG22
6	rs7741474	1.119e-17	4.874e-07	HCG22
6	rs9262646	1.119e-17	4.874e-07	HCG22
6	rs9262647	1.119e-17	4.874e-07	HCG22
6	rs9278856	1.119e-17	4.874e-07	HCG22
6	rs9262650	1.119e-17	4.874e-07	HCG22
6	rs7356893	7.645e-18	4.892e-07	HCG22
6	rs2856695	3.384e-17	4.899e-07	#N/A
6	rs1126506	5.034e-12	4.972e-07	HLA-DPA1
6	rs9262656	7.92e-18	4.994e-07	#N/A
6	rs3764808	7.799e-18	5.013e-07	HCG22
6	rs2394423	8.275e-18	5.029e-07	HCG22
6	rs1126504	4.611e-12	5.047e-07	HLA-DPA1
6	rs1126509	4.611e-12	5.047e-07	HLA-DPA1
6	rs9277552	1.435e-09	5.065e-07	HLA-DPA2
6	rs7772290	4.455e-12	5.277e-07	#N/A
6	rs887464	6.041e-12	5.383e-07	POU5F1
6	rs3131002	2.258e-15	5.43e-07	CDSN
6	rs9262630	4.384e-18	5.508e-07	HCG22
6	rs9262676	1.14e-17	5.543e-07	#N/A
6	rs9368661	1.579e-11	5.581e-07	#N/A
6	rs2844633	2.146e-14	5.754e-07	PSORS1C1
6	rs2394402	1.114e-15	5.888e-07	HCG20
6	rs12526246	4.426e-08	5.973e-07	HLA-B
6	rs1265093	4.81e-15	5.978e-07	CCHCR1
6	rs3095297	2.193e-12	6.052e-07	C6orf15
6	rs1062470	2.193e-12	6.052e-07	C6orf15
6	rs3094213	2.193e-12	6.052e-07	CDSN
6	rs3130990	2.193e-12	6.052e-07	CDSN
6	rs3130991	2.193e-12	6.052e-07	CDSN
6	rs2302399	2.193e-12	6.052e-07	CDSN
6	rs3091255	2.219e-12	6.052e-07	CDSN
6	rs6905862	8.884e-12	6.136e-07	CCHCR1
6	rs2856821	1.731e-10	6.189e-07	HLA-DPA1
6	rs1126511	3.135e-12	6.252e-07	HLA-DPA1
6	rs3130996	1.518e-12	6.292e-07	CDSN
6	rs3131001	1.227e-12	6.297e-07	CDSN
6	rs2239521	1.113e-12	6.364e-07	CDSN
6	rs2239522	1.113e-12	6.364e-07	CDSN
6	rs1126513	2.798e-12	6.457e-07	HLA-DPA1
6	rs3834327	1.251e-12	6.468e-07	CDSN
6	rs3130995	1.251e-12	6.468e-07	CDSN
6	rs3095313	1.251e-12	6.468e-07	CDSN
6	rs3094207	1.251e-12	6.468e-07	CDSN
6	rs3132544	1.872e-12	6.476e-07	CDSN
6	rs6909620	2.822e-13	6.482e-07	#N/A
6	rs9269146	1.424e-14	6.656e-07	HLA-DRB9
6	rs885951	3.5e-12	6.702e-07	POU5F1
6	rs4501465	1.017e-15	6.745e-07	HLA-DPA1
6	rs9296073	1.017e-15	6.745e-07	HLA-DPA1
6	rs9296074	1.017e-15	6.745e-07	HLA-DPA1
6	rs9295895	3.542e-13	6.946e-07	SUCLA2P1
6	rs1431402	2.469e-10	7.108e-07	HLA-DPA1
6	rs4713456	3.332e-12	7.271e-07	HLA-B
6	rs2077010	4.12e-12	7.329e-07	POU5F1
6	rs2021408	3.642e-10	7.366e-07	HLA-DPA1
6	rs147832398	3.674e-11	7.379e-07	#N/A
6	rs3130667	8.584e-16	7.477e-07	HCG20
6	rs3132602	8.584e-16	7.477e-07	HCG20
6	rs3131039	8.584e-16	7.477e-07	HCG20
6	rs3095341	8.719e-17	7.514e-07	#N/A
6	rs9263871	1.34e-08	7.976e-07	AL662844.3
6	rs9380340	1.302e-15	8.266e-07	HLA-DPA1
6	rs373292445	3.517e-08	8.492e-07	#N/A
6	rs3828913	1.073e-19	8.515e-07	MICB
6	rs3906263	2.214e-17	8.658e-07	HCG22
6	rs3128927	1.586e-09	8.822e-07	COL11A2P1
6	rs7740279	9.009e-16	8.836e-07	HCG20
6	rs41315175	2.874e-17	8.842e-07	#N/A
6	rs9262651	5.624e-18	8.974e-07	HCG22
6	rs9295945	7.697e-18	9.057e-07	HCG22
6	rs117689957	5.898e-18	9.16e-07	TNXB
6	rs9394032	8.524e-18	9.287e-07	HCG22
6	rs9380211	8.524e-18	9.287e-07	HCG22
6	rs9295946	8.524e-18	9.287e-07	HCG22
6	rs9295947	8.524e-18	9.287e-07	HCG22
6	rs9295948	8.524e-18	9.287e-07	HCG22
6	rs2394426	8.524e-18	9.287e-07	HCG22
6	rs2894048	8.524e-18	9.287e-07	HCG22
6	rs2394425	8.524e-18	9.287e-07	HCG22
6	rs9357106	8.524e-18	9.287e-07	HCG22
6	rs3888579	8.524e-18	9.287e-07	HCG22
6	rs3024247	1.159e-17	9.355e-07	#N/A
6	rs9263450	2.803e-17	9.442e-07	#N/A
6	rs9263218	2.895e-17	9.589e-07	#N/A
6	rs3129979	9.12e-16	9.61e-07	HCG20
6	rs9394130	2.557e-15	9.978e-07	HLA-DPA1
6	rs2844665	2.699e-10	1.012e-06	MUC22
6	rs2844669	2.74e-10	1.012e-06	MUC22
6	rs2517550	2.758e-10	1.012e-06	#N/A
6	rs12175179	1.751e-17	1.017e-06	#N/A
6	rs3891154	2.168e-17	1.018e-06	#N/A
6	rs4590261	1.806e-08	1.024e-06	AL662844.1
6	rs2394427	8.049e-18	1.044e-06	HCG22
6	rs13409	6.529e-12	1.049e-06	POU5F1
6	rs2116263	1.124e-15	1.091e-06	#N/A
6	rs3130553	4.836e-11	1.092e-06	C6orf15
6	rs9380134	1.69e-13	1.098e-06	MOG
6	rs9265912	2.221e-08	1.102e-06	HLA-B
6	rs4455663	1.907e-08	1.112e-06	AL662844.1
6	rs885952	2.21e-12	1.12e-06	POU5F1
6	rs10947131	7.925e-18	1.126e-06	#N/A
6	rs130066	1.367e-11	1.162e-06	CCHCR1
6	rs9262634	2.895e-17	1.163e-06	HCG22
6	rs7745521	2.895e-17	1.163e-06	HCG22
6	rs1056429	6.979e-14	1.164e-06	AL671883.2
6	rs2308927	1.043e-15	1.188e-06	HLA-DPA1
6	rs1126544	1.043e-15	1.188e-06	HLA-DPA1
6	rs3130980	4.614e-12	1.201e-06	C6orf15
6	rs28362342	8.262e-09	1.252e-06	AL662844.3
6	rs7764668	1.073e-08	1.26e-06	AL662844.4
6	rs28362345	8.262e-09	1.265e-06	AL662844.3
6	rs707913	4.788e-13	1.337e-06	C6orf15
6	rs2517539	6.64e-10	1.344e-06	#N/A
6	rs3095316	5.391e-12	1.358e-06	CDSN
6	rs9391895	1.115e-15	1.363e-06	GPR53P
6	rs2523876	7.95e-10	1.366e-06	#N/A
6	rs2523873	1.858e-10	1.397e-06	#N/A
6	rs2523872	1.782e-10	1.414e-06	#N/A
6	rs2517552	1.802e-10	1.423e-06	MUC22
6	rs2844672	4.873e-10	1.427e-06	MUC22
6	rs2523874	4.916e-10	1.427e-06	#N/A
6	rs117199710	1.019e-15	1.458e-06	#N/A
6	rs17192554	5.846e-10	1.477e-06	HLA-B
6	rs1265045	1.016e-12	1.483e-06	CDSN
6	rs17198923	5.898e-10	1.484e-06	HLA-B
6	rs2517553	7.609e-10	1.503e-06	MUC22
6	rs602875	2.374e-08	1.51e-06	#N/A
6	rs3130554	2.936e-11	1.543e-06	C6orf15
6	rs3094205	6.953e-12	1.571e-06	CDSN
6	rs2517548	3.266e-10	1.594e-06	#N/A
6	rs9281117	8.023e-18	1.605e-06	HCG22
6	rs9394034	2.902e-17	1.647e-06	#N/A
6	rs3020583	8.455e-12	1.677e-06	HLA-S
6	rs3828888	1.979e-10	1.678e-06	HCP5
6	rs12207410	2.129e-10	1.712e-06	OR12D1
6	rs4713467	1.705e-10	1.775e-06	HCP5
6	rs9393967	1.234e-13	1.798e-06	AL662860.1
6	rs9404989	1.298e-10	1.846e-06	HCP5
6	rs9380189	1.615e-09	1.853e-06	LINC00243
6	rs2517537	3.24e-10	1.859e-06	#N/A
6	rs1475961	4.935e-10	1.866e-06	NOTCH4
6	rs3132950	4.935e-10	1.866e-06	NOTCH4
6	rs1475960	4.935e-10	1.866e-06	NOTCH4
6	rs3096691	4.935e-10	1.866e-06	NOTCH4
6	rs1265156	7.354e-14	1.868e-06	POU5F1
6	rs9267845	4.302e-10	1.868e-06	NOTCH4
6	rs2395105	3.965e-10	1.87e-06	NOTCH4
6	rs9296003	3.733e-15	1.884e-06	SKIV2L
6	rs2523871	3.205e-10	1.921e-06	#N/A
6	rs2523870	3.205e-10	1.921e-06	#N/A
6	rs3131927	3.242e-10	1.938e-06	#N/A
6	rs2395106	4.389e-10	1.969e-06	NOTCH4
6	rs12202249	2.521e-10	1.995e-06	OR12D1
6	rs2517538	2.751e-10	2.011e-06	#N/A
6	rs9393957	2.769e-10	2.049e-06	OR12D1
6	rs9263460	6.125e-13	2.051e-06	#N/A
6	rs12524498	3.286e-09	2.066e-06	HCP5
6	rs7349908	2.667e-10	2.085e-06	OR11A1
6	rs9295805	2.181e-10	2.09e-06	OR11A1
6	rs9393959	1.932e-10	2.095e-06	OR11A1
6	rs7349875	1.932e-10	2.095e-06	OR11A1
6	rs7349876	1.932e-10	2.095e-06	OR11A1
6	rs9393958	2.089e-10	2.095e-06	OR12D1
6	rs12193979	2.158e-10	2.095e-06	OR12D1
6	rs9393960	2.405e-10	2.185e-06	OR11A1
6	rs12207974	8.72e-09	2.203e-06	HLA-E
6	rs2844681	5.681e-10	2.253e-06	MUC22
6	rs2524058	7.789e-11	2.283e-06	HLA-B
6	rs2116261	1.485e-15	2.289e-06	#N/A
6	rs10946990	2.098e-10	2.291e-06	OR11A1
6	rs2394429	9.024e-10	2.294e-06	MUC22
6	rs3029487	3.039e-10	2.298e-06	OR12D1
6	rs117508328	1.746e-15	2.381e-06	#N/A
6	rs117652223	1.746e-15	2.381e-06	#N/A
6	rs17606000	1.746e-15	2.381e-06	#N/A
6	rs146916103	1.746e-15	2.381e-06	#N/A
6	rs3130713	1.52e-13	2.44e-06	#N/A
6	rs117125720	6.41e-17	2.443e-06	#N/A
6	rs2524076	3.505e-15	2.53e-06	HLA-B
6	rs3094680	3.568e-15	2.53e-06	HLA-B
6	rs9266059	1.95e-11	2.583e-06	HLA-B
6	rs9265977	1.2e-09	2.583e-06	HLA-B
6	rs2078675	1.228e-08	2.605e-06	HLA-E
6	rs7739302	6.208e-14	2.622e-06	HLA-DRB9
6	rs576957502	1.228e-17	2.67e-06	#N/A
6	rs3128930	9.601e-09	2.753e-06	COL11A2P1
6	rs10807056	2.602e-10	2.758e-06	OR11A1
6	rs7349863	2.695e-10	2.761e-06	OR11A1
6	rs1042153	1.734e-09	2.806e-06	HLA-DPA1
6	rs3132531	1.609e-13	2.817e-06	#N/A
6	rs3132530	1.609e-13	2.817e-06	#N/A
6	rs3132529	1.609e-13	2.817e-06	#N/A
6	rs3132521	1.609e-13	2.817e-06	#N/A
6	rs9265978	4.788e-10	2.872e-06	HLA-B
6	rs9357141	8.368e-13	2.894e-06	#N/A
6	rs117831873	8.068e-13	2.913e-06	#N/A
6	rs9380123	2.726e-10	3.009e-06	OR5V1
6	rs2523599	1.872e-14	3.029e-06	HLA-B
6	rs2273019	1.18e-10	3.054e-06	TSBP1
6	rs117405699	8.43e-09	3.105e-06	TRIM26
6	rs114493852	1.733e-17	3.208e-06	#N/A
6	rs3130201	6.812e-12	3.212e-06	HLA-DPA2
6	rs9391732	5.478e-15	3.244e-06	C4A
6	rs1419635	8.72e-11	3.261e-06	OR5V1
6	rs9265984	3.813e-10	3.305e-06	HLA-B
6	rs9265986	3.813e-10	3.305e-06	HLA-B
6	rs9265987	3.813e-10	3.305e-06	HLA-B
6	rs149490268	1.12e-17	3.328e-06	#N/A
6	rs9405124	3.231e-10	3.333e-06	OR12D2
6	rs9348829	2.891e-10	3.335e-06	OR12D2
6	rs2073152	2.891e-10	3.335e-06	OR12D2
6	rs10946988	2.891e-10	3.335e-06	OR5V1
6	rs1362061	3.985e-10	3.365e-06	OR5V1
6	rs1592404	3.067e-10	3.372e-06	OR12D2
6	rs115738641	1.031e-15	3.385e-06	HLA-DQA1
6	rs114991247	8.494e-18	3.422e-06	#N/A
6	rs187751879	1.172e-15	3.451e-06	#N/A
6	rs3095312	2.639e-10	3.469e-06	CDSN
6	rs3130997	2.639e-10	3.469e-06	CDSN
6	rs3130513	2.157e-08	3.469e-06	#N/A
6	rs2394430	5.628e-10	3.484e-06	MUC22
6	rs9461613	1.095e-08	3.494e-06	SUCLA2P1
6	rs9368600	7.217e-09	3.495e-06	OR11A1
6	rs12526593	1.184e-17	3.506e-06	#N/A
6	rs3130999	2.262e-10	3.544e-06	CDSN
6	rs3131000	2.262e-10	3.544e-06	CDSN
6	rs139558884	3.24e-16	3.55e-06	HLA-DQA1
6	rs3132543	3.216e-10	3.55e-06	CDSN
6	rs145397816	9.323e-18	3.554e-06	#N/A
6	rs28836874	1.829e-12	3.564e-06	#N/A
6	rs16822599	1.411e-15	3.625e-06	HLA-DRA
6	rs146566004	1.097e-17	3.653e-06	#N/A
6	rs141308633	1.097e-17	3.653e-06	#N/A
6	rs144934262	1.097e-17	3.653e-06	#N/A
6	rs61341125	1.715e-15	3.714e-06	#N/A
6	rs3132954	4.595e-11	3.762e-06	TSBP1
6	rs4711236	1.304e-09	3.783e-06	LINC00243
6	rs4711237	1.304e-09	3.783e-06	LINC00243
6	rs2394608	2.868e-10	3.802e-06	OR5V1
6	rs9295917	1.576e-09	3.828e-06	LINC00243
6	rs532385	3.245e-12	3.834e-06	NOTCH4
6	rs3132569	1.515e-12	3.851e-06	PSORS1C1
6	rs4713555	1.319e-17	3.899e-06	#N/A
6	rs4587207	8.495e-10	3.921e-06	LINC00243
6	rs3129942	6.037e-12	4.035e-06	TSBP1
6	rs6457375	3.721e-11	4.073e-06	AL671883.1
6	rs3130559	2.774e-13	4.081e-06	PSORS1C1
6	rs2394403	1.356e-09	4.147e-06	LINC00243
6	rs9295918	1.22e-09	4.17e-06	LINC00243
6	rs13213083	1.22e-09	4.17e-06	LINC00243
6	rs13213469	1.22e-09	4.17e-06	LINC00243
6	rs9281119	2.553e-15	4.192e-06	HCG22
6	rs13198118	1.013e-09	4.195e-06	LINC00243
6	rs3132570	2.352e-12	4.241e-06	PSORS1C1
6	rs28481932	2.304e-13	4.335e-06	HLA-B
6	rs9378109	9.362e-10	4.445e-06	LINC00243
6	rs9380190	1.225e-09	4.508e-06	LINC00243
6	rs2233970	1.246e-12	4.518e-06	C6orf15
6	rs9405095	1.137e-12	4.581e-06	TSBP1-AS1
6	rs9380292	1.137e-12	4.581e-06	TSBP1-AS1
6	rs117966254	1.083e-12	4.598e-06	TSBP1-AS1
6	rs9271365	4.65e-09	4.617e-06	#N/A
6	rs9380191	1.167e-09	4.636e-06	LINC00243
6	rs3888583	1.23e-09	4.637e-06	LINC00243
6	rs13213098	9.628e-10	4.656e-06	LINC00243
6	rs2269854	6.65e-10	4.664e-06	LINC00243
6	rs9380198	8.831e-10	4.746e-06	LINC00243
6	rs9404974	1.068e-09	4.793e-06	LINC00243
6	rs56229131	4.193e-19	4.855e-06	HLA-B
6	rs13191291	9.586e-10	4.864e-06	LINC00243
6	rs9368640	9.586e-10	4.864e-06	LINC00243
6	rs9394014	9.586e-10	4.864e-06	LINC00243
6	rs12525494	9.586e-10	4.864e-06	LINC00243
6	rs57403748	9.586e-10	4.864e-06	LINC00243
6	rs9295920	9.586e-10	4.864e-06	LINC00243
6	rs9391692	9.586e-10	4.864e-06	LINC00243
6	rs9404973	9.586e-10	4.864e-06	LINC00243
6	rs9391694	9.586e-10	4.864e-06	LINC00243
6	rs9380193	9.586e-10	4.864e-06	LINC00243
6	rs9380195	9.586e-10	4.864e-06	LINC00243
6	rs12528843	9.586e-10	4.864e-06	LINC00243
6	rs9404975	9.586e-10	4.864e-06	LINC00243
6	rs4713380	9.573e-10	4.881e-06	LINC00243
6	rs9267429	3.087e-08	4.893e-06	MICB
6	rs9267431	3.087e-08	4.893e-06	AL663061.1
6	rs117146138	7.675e-13	4.896e-06	TSBP1-AS1
6	rs117654464	1.434e-12	4.903e-06	BTNL2
6	rs6457566	1.551e-12	4.903e-06	BTNL2
6	rs17208706	1.551e-12	4.903e-06	BTNL2
6	rs117026188	1.551e-12	4.903e-06	BTNL2
6	rs118160129	4.435e-11	4.952e-06	#N/A
6	rs13202930	1.616e-08	4.964e-06	SUCLA2P1
6	rs117393793	1.481e-12	4.988e-06	BTNL2
6	rs5025823	7.289e-15	4.998e-06	#N/A
6	rs5025824	7.289e-15	4.998e-06	#N/A
6	rs9275289	1.259e-11	5.023e-06	#N/A
6	rs7761210	1.438e-08	5.088e-06	SUCLA2P1
6	rs148474360	1.881e-09	5.14e-06	#N/A
6	rs6908934	2.613e-08	5.147e-06	MICB
6	rs2233984	4.173e-13	5.174e-06	C6orf15
6	rs2894196	1.875e-20	5.188e-06	#N/A
6	rs13191728	8.816e-10	5.203e-06	LINC00243
6	rs9368695	1.4e-08	5.212e-06	#N/A
6	rs4713382	8.275e-10	5.222e-06	LINC00243
6	rs4713383	8.448e-10	5.222e-06	LINC00243
6	rs10947101	9.094e-10	5.276e-06	LINC00243
6	rs138020512	2.159e-09	5.308e-06	RF00554
6	rs9348858	1.409e-18	5.31e-06	HLA-B
6	rs4248149	1.268e-09	5.311e-06	LINC00243
6	rs9275291	2.251e-12	5.315e-06	#N/A
6	rs12174870	1.373e-08	5.338e-06	SUCLA2P1
6	rs9295896	1.373e-08	5.338e-06	SUCLA2P1
6	rs35600573	1.373e-08	5.338e-06	SUCLA2P1
6	rs6929424	1.373e-08	5.338e-06	SUCLA2P1
6	rs10080488	1.373e-08	5.338e-06	#N/A
6	rs35712488	1.373e-08	5.338e-06	#N/A
6	rs7769823	1.373e-08	5.338e-06	#N/A
6	rs9295897	1.373e-08	5.338e-06	#N/A
6	rs7775268	1.373e-08	5.338e-06	#N/A
6	rs4713385	6.084e-10	5.367e-06	LINC00243
6	rs7751869	7.894e-10	5.41e-06	LINC00243
6	rs4947289	9.178e-10	5.41e-06	LINC00243
6	rs9267352	2.271e-08	5.474e-06	MICB
6	rs563648725	3.824e-16	5.486e-06	HLA-DQA1
6	rs2517473	3.184e-13	5.496e-06	C6orf15
6	rs4713389	7.866e-10	5.506e-06	LINC00243
6	rs9368644	1.388e-09	5.54e-06	LINC00243
6	rs2021719	1.123e-08	5.593e-06	RANP1
6	rs6905957	3.942e-10	5.601e-06	LINC00243
6	rs34154598	6.662e-10	5.671e-06	LINC00243
6	rs6457619	6.843e-12	5.714e-06	#N/A
6	rs5000634	7.001e-12	5.714e-06	#N/A
6	rs6457622	7.001e-12	5.714e-06	#N/A
6	rs7745040	7.001e-12	5.714e-06	#N/A
6	rs2894380	7.001e-12	5.714e-06	#N/A
6	rs9263572	5.646e-13	5.755e-06	#N/A
6	rs9263499	5.683e-13	5.755e-06	#N/A
6	rs2894179	5.683e-13	5.755e-06	#N/A
6	rs9263512	5.683e-13	5.755e-06	#N/A
6	rs9278969	5.683e-13	5.755e-06	#N/A
6	rs9263578	5.683e-13	5.755e-06	#N/A
6	rs9295898	1.219e-08	5.849e-06	RANP1
6	rs2021720	1.219e-08	5.849e-06	RANP1
6	rs6921669	1.219e-08	5.849e-06	RANP1
6	rs9405097	1.18e-12	5.853e-06	BTNL2
6	rs117182798	1.237e-12	5.853e-06	BTNL2
6	rs9295924	1.312e-09	5.895e-06	LINC00243
6	rs4713384	1.312e-09	5.895e-06	LINC00243
6	rs10947102	1.312e-09	5.895e-06	LINC00243
6	rs6901761	1.312e-09	5.895e-06	LINC00243
6	rs13201384	1.312e-09	5.895e-06	LINC00243
6	rs7751827	1.312e-09	5.895e-06	LINC00243
6	rs12661685	1.312e-09	5.895e-06	LINC00243
6	rs2105960	1.224e-08	5.932e-06	HLA-E
6	rs151195548	2.222e-19	5.937e-06	#N/A
6	rs9368667	2.222e-19	5.937e-06	HLA-B
6	rs67156613	2.222e-19	5.937e-06	HLA-B
6	rs2223636	1.073e-10	6.011e-06	TSBP1
6	rs72860304	2.02e-19	6.021e-06	HLA-B
6	rs9378148	9.204e-10	6.071e-06	LINC00243
6	rs4947290	1.124e-09	6.108e-06	LINC00243
6	rs9394037	3.904e-13	6.128e-06	#N/A
6	rs9348854	3.904e-13	6.128e-06	#N/A
6	rs9357108	3.904e-13	6.128e-06	#N/A
6	rs9405049	3.904e-13	6.128e-06	#N/A
6	rs34209658	3.904e-13	6.128e-06	#N/A
6	rs35802713	3.904e-13	6.128e-06	#N/A
6	rs4947297	3.904e-13	6.128e-06	#N/A
6	rs4947299	3.904e-13	6.128e-06	#N/A
6	rs4947302	3.904e-13	6.128e-06	C6orf15
6	rs4947246	3.904e-13	6.128e-06	C6orf15
6	rs9404978	3.904e-13	6.128e-06	C6orf15
6	rs10947135	3.904e-13	6.128e-06	C6orf15
6	rs78032704	3.904e-13	6.128e-06	C6orf15
6	rs2233983	3.904e-13	6.128e-06	C6orf15
6	rs138928713	1.4e-18	6.177e-06	HLA-B
6	rs6910297	2.898e-08	6.214e-06	MICB
6	rs9391860	1.18e-12	6.225e-06	BTNL2
6	rs9391709	4.157e-13	6.239e-06	C6orf15
6	rs9368577	1.815e-08	6.24e-06	#N/A
6	rs7751130	1.108e-09	6.292e-06	POU5F1
6	rs1126534	4.972e-15	6.389e-06	HLA-DPA1
6	rs1126533	4.972e-15	6.389e-06	HLA-DPA1
6	rs147480718	1.065e-12	6.492e-06	TSBP1
6	rs2233973	3.953e-13	6.533e-06	C6orf15
6	rs6926927	2.978e-13	6.536e-06	AL671883.1
6	rs3128966	4.839e-08	6.573e-06	HLA-DPA2
6	rs9277379	4.868e-08	6.573e-06	HLA-DPA1
6	rs74606007	4.914e-16	6.579e-06	HLA-DQA1
6	rs115016190	3.496e-16	6.696e-06	HLA-DQA1
6	rs146217951	3.496e-16	6.696e-06	HLA-DQA1
6	rs77639852	3.496e-16	6.696e-06	HLA-DQA1
6	rs78692977	3.496e-16	6.696e-06	HLA-DQA1
6	rs76822178	3.496e-16	6.696e-06	HLA-DQA1
6	rs79473311	3.496e-16	6.696e-06	HLA-DQA1
6	rs79573551	3.496e-16	6.696e-06	HLA-DQA1
6	rs9275297	1.701e-11	6.698e-06	#N/A
6	rs79541122	5.908e-15	6.742e-06	HLA-DPA1
6	rs80002776	1.001e-08	6.743e-06	#N/A
6	rs78103064	1.424e-15	6.758e-06	HLA-DPA1
6	rs117248572	5.724e-15	6.76e-06	#N/A
6	rs4947296	4.64e-13	6.828e-06	#N/A
6	rs12527394	3.327e-13	6.829e-06	RNU6-1133P
6	rs12529288	3.327e-13	6.829e-06	#N/A
6	rs3095307	7.379e-12	6.892e-06	CDSN
6	rs6901776	2.363e-09	6.928e-06	LINC00243
6	rs555111717	3.319e-15	6.961e-06	HLA-DQA1
6	rs115908946	3.324e-16	6.987e-06	HLA-DQA1
6	rs3094206	1.831e-10	7.052e-06	CDSN
6	rs114308959	5.505e-16	7.057e-06	HLA-DQA1
6	rs114088880	3.537e-16	7.065e-06	HLA-DQA1
6	rs9461748	2.995e-18	7.099e-06	#N/A
6	rs28381567	3.992e-09	7.129e-06	LINC00243
6	rs115711192	3.637e-16	7.154e-06	HLA-DQA1
6	rs150015489	3.637e-16	7.154e-06	HLA-DQA1
6	rs114027542	3.637e-16	7.154e-06	HLA-DQA1
6	rs373813924	3.637e-16	7.154e-06	HLA-DQA1
6	rs146353211	3.637e-16	7.154e-06	HLA-DQA1
6	rs117055012	3.637e-16	7.154e-06	HLA-DQA1
6	rs114352945	3.637e-16	7.154e-06	HLA-DQA1
6	rs114762033	3.637e-16	7.154e-06	HLA-DQA1
6	rs563316064	3.637e-16	7.154e-06	HLA-DQA1
6	rs575430623	3.637e-16	7.154e-06	HLA-DQA1
6	rs371537406	3.637e-16	7.154e-06	HLA-DQA1
6	rs114799674	3.637e-16	7.154e-06	HLA-DQA1
6	rs115573799	3.637e-16	7.154e-06	HLA-DQA1
6	rs115503527	3.637e-16	7.154e-06	HLA-DQA1
6	rs28534011	3.637e-16	7.154e-06	HLA-DQA1
6	rs565181451	3.637e-16	7.154e-06	HLA-DQA1
6	rs545248976	3.637e-16	7.154e-06	HLA-DQA1
6	rs28417660	3.637e-16	7.154e-06	HLA-DQA1
6	rs372332783	3.637e-16	7.154e-06	HLA-DQA1
6	rs199950886	3.637e-16	7.154e-06	HLA-DQA1
6	rs114895321	3.637e-16	7.154e-06	HLA-DQA1
6	rs115717621	3.637e-16	7.154e-06	HLA-DQA1
6	rs114025574	3.637e-16	7.154e-06	HLA-DQA1
6	rs114774960	3.637e-16	7.154e-06	HLA-DQA1
6	rs115493697	3.637e-16	7.154e-06	HLA-DQA1
6	rs115139056	3.637e-16	7.154e-06	HLA-DQA1
6	rs559861992	3.637e-16	7.154e-06	HLA-DQA1
6	rs116236894	3.637e-16	7.154e-06	HLA-DQA1
6	rs115296161	3.637e-16	7.154e-06	HLA-DQA1
6	rs182013486	3.637e-16	7.154e-06	HLA-DQA1
6	rs184922584	3.637e-16	7.154e-06	HLA-DQA1
6	rs181184133	3.637e-16	7.154e-06	HLA-DQA1
6	rs549131306	3.637e-16	7.154e-06	HLA-DQA1
6	rs139727756	3.637e-16	7.154e-06	HLA-DQA1
6	rs114307619	3.672e-16	7.154e-06	HLA-DQA1
6	rs115609519	3.672e-16	7.154e-06	HLA-DQA1
6	rs114307375	3.672e-16	7.154e-06	HLA-DQA1
6	rs143117432	3.672e-16	7.154e-06	HLA-DQA1
6	rs147493459	3.672e-16	7.154e-06	HLA-DQA1
6	rs116573360	3.672e-16	7.154e-06	HLA-DQA1
6	rs576628433	3.672e-16	7.154e-06	HLA-DQA1
6	rs138816958	3.672e-16	7.154e-06	HLA-DQA1
6	rs138238823	3.672e-16	7.154e-06	HLA-DQA1
6	rs146406015	3.672e-16	7.154e-06	HLA-DQA1
6	rs139692935	3.672e-16	7.154e-06	HLA-DQA1
6	rs879665507	3.672e-16	7.154e-06	HLA-DQA1
6	rs115315696	3.672e-16	7.154e-06	HLA-DQA1
6	rs550642974	3.672e-16	7.154e-06	HLA-DQA1
6	rs115624624	3.672e-16	7.154e-06	HLA-DQA1
6	rs116202168	3.672e-16	7.154e-06	HLA-DQA1
6	rs114866528	3.672e-16	7.154e-06	HLA-DQA1
6	rs116633385	3.672e-16	7.154e-06	HLA-DQA1
6	rs116109088	3.672e-16	7.154e-06	HLA-DQA1
6	rs115214276	3.672e-16	7.154e-06	HLA-DQA1
6	rs116728358	3.672e-16	7.154e-06	HLA-DQA1
6	rs114310549	3.672e-16	7.154e-06	HLA-DQA1
6	rs115231411	3.672e-16	7.154e-06	HLA-DQA1
6	rs116485389	3.672e-16	7.154e-06	HLA-DQA1
6	rs536081339	3.672e-16	7.154e-06	HLA-DQA1
6	rs60038796	4.908e-15	7.155e-06	HLA-DPA1
6	rs7743506	7.519e-16	7.208e-06	HLA-DQB1
6	rs3094198	5.251e-12	7.217e-06	PSORS1C1
6	rs3134768	2.26e-13	7.237e-06	#N/A
6	rs9391859	1.137e-12	7.286e-06	BTNL2
6	rs9405096	1.137e-12	7.286e-06	BTNL2
6	rs9393927	1.046e-08	7.301e-06	#N/A
6	rs116517496	4.318e-16	7.328e-06	HLA-DQA1
6	rs6900039	4.86e-16	7.336e-06	HLA-DQB1
6	rs3094200	5.251e-12	7.344e-06	CDSN
6	rs28449420	4.365e-16	7.385e-06	HLA-DPA1
6	rs10947098	1.232e-09	7.43e-06	LINC00243
6	rs116494205	6.93e-16	7.498e-06	HLA-DQA1
6	rs367728179	3.623e-16	7.565e-06	HLA-DQA1
6	rs9272140	3.623e-16	7.565e-06	HLA-DQA1
6	rs115223053	3.629e-16	7.565e-06	HLA-DQA1
6	rs114968544	4.539e-16	7.572e-06	HLA-DQA1
6	rs4711220	9.014e-09	7.588e-06	HLA-E
6	rs9368601	9.983e-13	7.625e-06	OR10C1
6	rs2233985	8.124e-13	7.684e-06	C6orf15
6	rs9380260	3.664e-08	7.707e-06	MICB
6	rs3128965	4.794e-08	7.716e-06	HLA-DPA2
6	rs3094203	4.601e-12	7.922e-06	CDSN
6	rs9277381	4.265e-08	7.93e-06	HLA-DPA1
6	rs115700690	2.722e-16	7.949e-06	HLA-DQA1
6	rs1435796677	1.897e-10	7.949e-06	HLA-DQA1
6	rs1299721066	1.897e-10	7.949e-06	HLA-DQA1
6	rs3763311	1.406e-11	7.964e-06	BTNL2
6	rs9394040	1.544e-10	8.015e-06	POU5F1
6	rs9357111	1.544e-10	8.015e-06	POU5F1
6	rs17205373	1.252e-18	8.08e-06	HLA-DQB1
6	rs3095302	5.176e-12	8.195e-06	CDSN
6	rs150518666	1.678e-08	8.267e-06	#N/A
6	chr6:31108335_A_AT	3.614e-13	8.305e-06	#N/A
6	rs4495304	3.583e-13	8.359e-06	C6orf15
6	rs28720766	4.078e-16	8.404e-06	HLA-DQA1
6	rs3132520	1.546e-12	8.497e-06	POU5F1
6	rs192622422	2.069e-09	8.502e-06	#N/A
6	rs9380219	7.655e-13	8.617e-06	#N/A
6	rs71757905	2.215e-09	8.642e-06	MUC22
6	rs3130213	1.473e-08	8.733e-06	COL11A2P1
6	rs377160326	1.769e-10	8.74e-06	#N/A
6	rs368699425	3.753e-16	8.768e-06	HLA-DQA1
6	rs28635391	8.668e-16	8.985e-06	HLA-DQA1
6	rs9279637	1.501e-10	8.998e-06	BTNL2
6	rs17606006	6.153e-13	9.034e-06	#N/A
6	rs9380231	1.71e-18	9.18e-06	HLA-B
6	rs9368668	1.724e-18	9.18e-06	HLA-B
6	rs2853916	2.397e-09	9.288e-06	AL671883.1
6	rs55756482	4.697e-13	9.422e-06	RNU6-1133P
6	rs9263477	4.697e-13	9.422e-06	RNU6-1133P
6	rs9501161	4.305e-10	9.564e-06	AL645922.1
6	rs1264457	6.928e-12	9.757e-06	HLA-E
6	rs12527746	1.549e-15	9.804e-06	#N/A
6	rs2116262	1.033e-14	9.855e-06	#N/A
6	rs2853943	3.896e-10	9.857e-06	HLA-B
6	rs3868542	2.096e-10	9.961e-06	POU5F1
6	rs3871248	2.096e-10	9.961e-06	POU5F1
6	rs4713431	5.446e-13	9.972e-06	RNU6-1133P
6	rs9295949	3.221e-13	1.002e-05	RNU6-1133P
6	rs9295950	3.221e-13	1.002e-05	RNU6-1133P
6	rs7770635	5.135e-12	1.011e-05	AL671883.1
6	rs77078553	5.135e-12	1.011e-05	AL671883.1
6	rs9368673	5.135e-12	1.011e-05	AL671883.1
6	rs9368674	5.135e-12	1.011e-05	AL671883.1
6	rs34411813	5.135e-12	1.011e-05	AL671883.1
6	rs9394055	5.135e-12	1.011e-05	AL671883.1
6	rs9368679	5.135e-12	1.011e-05	AL671883.1
6	rs9368680	5.135e-12	1.011e-05	AL671883.1
6	rs9394056	5.135e-12	1.011e-05	AL671883.1
6	rs9357125	5.135e-12	1.011e-05	AL671883.1
6	rs150201065	5.135e-12	1.011e-05	AL671883.1
6	rs66803894	5.135e-12	1.011e-05	AL671883.1
6	rs9366779	5.135e-12	1.011e-05	AL671883.1
6	rs9394057	5.135e-12	1.011e-05	AL671883.1
6	rs68163013	5.135e-12	1.011e-05	AL671883.1
6	rs6930944	5.135e-12	1.011e-05	AL671883.1
6	rs9368675	5.301e-12	1.011e-05	AL671883.1
6	rs7750269	5.412e-12	1.011e-05	AL671883.1
6	rs7761515	5.339e-12	1.019e-05	AL671883.1
6	rs9501066	2.096e-10	1.021e-05	POU5F1
6	rs9391844	1.507e-09	1.028e-05	HLA-B
6	rs9391845	1.507e-09	1.028e-05	HLA-B
6	rs3841160	1.177e-17	1.036e-05	HLA-DPA1
6	rs12662112	1.177e-17	1.036e-05	HLA-DPA1
6	rs9368678	5.146e-12	1.037e-05	AL671883.1
6	rs7760988	5.149e-12	1.037e-05	AL671883.1
6	rs9391816	2.251e-10	1.046e-05	POU5F1
6	rs9268499	1.637e-10	1.052e-05	BTNL2
6	rs1554139238	1.621e-10	1.068e-05	#N/A
6	rs887466	3.088e-10	1.071e-05	POU5F1
6	rs10807087	3.26e-19	1.076e-05	HLA-B
6	rs147352225	6.723e-09	1.076e-05	OR2B3
6	rs34140409	1.778e-10	1.083e-05	AL645922.1
6	rs3130699	2.176e-13	1.129e-05	#N/A
6	rs145036746	1.842e-13	1.131e-05	TSBP1-AS1
6	rs9275380	2.136e-08	1.136e-05	#N/A
6	rs9275382	2.136e-08	1.136e-05	#N/A
6	rs576400044	1.954e-13	1.138e-05	#N/A
6	rs6906721	2.257e-12	1.139e-05	HLA-B
6	rs28383835	2.32e-10	1.15e-05	POU5F1
6	rs9275500	2.714e-18	1.152e-05	MTCO3P1
6	rs4947305	2.376e-10	1.152e-05	POU5F1
6	rs7770946	2.376e-10	1.152e-05	POU5F1
6	rs3871246	2.376e-10	1.152e-05	POU5F1
6	rs9368657	2.376e-10	1.152e-05	POU5F1
6	rs9368658	2.376e-10	1.152e-05	POU5F1
6	rs9357110	2.376e-10	1.152e-05	POU5F1
6	rs7750695	5.11e-12	1.153e-05	AL671883.1
6	rs3871247	2.466e-10	1.162e-05	POU5F1
6	rs146593109	2.618e-08	1.188e-05	#N/A
6	rs142544441	4.538e-15	1.196e-05	HLA-DPA1
6	rs2116260	5.475e-15	1.199e-05	#N/A
6	rs2002777	4.341e-12	1.218e-05	HLA-DQA1
6	rs2070600	2.959e-09	1.272e-05	AGER
6	rs3130936	8.997e-13	1.301e-05	#N/A
6	rs3734854	9.56e-13	1.312e-05	C6orf15
6	rs9391855	2.171e-09	1.316e-05	AGER
6	rs9272226	3.878e-12	1.317e-05	HLA-DQA1
6	rs9380215	4.265e-13	1.319e-05	RNU6-1133P
6	rs9380217	4.265e-13	1.319e-05	RNU6-1133P
6	rs9267378	4.298e-08	1.32e-05	MICB
6	rs9391763	3.496e-08	1.329e-05	SUCLA2P1
6	rs28383836	2.072e-10	1.335e-05	POU5F1
6	rs3130945	4.782e-13	1.379e-05	AL662844.2
6	rs3094196	8.558e-13	1.394e-05	PSORS1C1
6	rs1265155	3.508e-10	1.415e-05	POU5F1
6	rs9378247	6.804e-11	1.416e-05	AL671883.2
6	rs6909425	2.747e-08	1.429e-05	MUC21
6	rs3132482	1.182e-08	1.431e-05	HLA-B
6	rs752245759	8.574e-16	1.507e-05	HLA-DQA1
6	rs117369084	9.324e-09	1.513e-05	ATF6B
6	rs9368581	9.174e-11	1.521e-05	RNU6-930P
6	rs9268644	5.962e-13	1.535e-05	HLA-DRA
6	rs3129870	3.442e-13	1.541e-05	HLA-DRA
6	rs118090768	1.09e-08	1.55e-05	AL662884.2
6	rs9268399	8.173e-11	1.561e-05	TSBP1
6	rs73415233	4.274e-15	1.658e-05	#N/A
6	rs995185	8.838e-09	1.662e-05	GABBR1
6	rs3130473	5.553e-13	1.682e-05	#N/A
6	rs2507993	2.366e-09	1.695e-05	AL671883.2
6	rs2856816	9.177e-15	1.704e-05	HLA-DPA1
6	rs12614	9.082e-10	1.72e-05	#N/A
6	rs9394047	2.06e-18	1.73e-05	HLA-B
6	rs3217063	1.215e-13	1.741e-05	MUCL3
14	rs3783943	9.034e-18	1.994e-09	AC007262.1
14	rs17111365	3.804e-18	5.962e-09	AC007262.1
14	rs2160215	4.445e-20	8.985e-09	TSHR
14	rs1023586	4.445e-20	8.985e-09	TSHR
14	rs28414437	1.053e-19	1.248e-08	TSHR
14	rs4903961	5.438e-20	1.325e-08	RPL17P3
14	rs2284730	7.591e-19	1.419e-08	AC007262.1
14	rs4903962	6.084e-19	1.629e-08	RPL17P3
14	rs12323356	1.054e-18	1.715e-08	RPL17P3
14	rs4903964	2.879e-18	1.813e-08	AC007262.1
14	rs7152373	3.17e-18	1.825e-08	AC007262.1
14	rs55957493	1.58e-18	2.069e-08	AC007262.1
14	rs55960644	1.584e-18	2.069e-08	AC007262.1
14	rs11159479	1.683e-18	2.976e-08	TSHR
14	rs56389234	1.683e-18	2.976e-08	TSHR
14	rs60462373	2.871e-18	3.092e-08	AC007262.1
14	rs6574617	4.087e-18	3.458e-08	TSHR
14	rs10145099	4.828e-18	3.924e-08	TSHR
14	rs2371463	6.641e-18	4.222e-08	TSHR
14	rs58417382	5.623e-18	4.59e-08	AC007262.1
14	rs58266067	5.623e-18	4.59e-08	AC007262.1
14	rs58241131	5.781e-18	4.59e-08	AC007262.1
14	rs2268459	6.613e-19	4.758e-08	RPL17P3
14	rs724170	2.069e-17	5.364e-08	TSHR
14	rs35540104	1.207e-13	8.031e-07	CEP128
14	rs1016507	1.355e-13	8.221e-07	CEP128
14	rs228118	1.103e-13	1.017e-06	CEP128
14	rs2556605	2.691e-14	1.042e-06	CEP128
14	rs172920	1.955e-14	2.432e-06	CEP128
14	rs2217176	1.511e-14	2.633e-06	CEP128
14	rs728444	1.208e-13	3.028e-06	CEP128
14	rs228127	9.84e-15	3.161e-06	CEP128
14	rs2556601	1.68e-14	3.392e-06	CEP128
14	rs7154373	3.598e-14	3.618e-06	CEP128
14	rs12891585	1.134e-12	3.903e-06	CEP128
14	rs4903948	1.498e-14	4.042e-06	CEP128
14	rs2217174	7.241e-14	4.095e-06	CEP128
14	rs8021137	1.758e-14	4.104e-06	CEP128
14	rs1025253	1.463e-14	4.247e-06	CEP128
14	rs8022411	1.463e-14	4.247e-06	CEP128
14	rs8005883	2.242e-14	4.322e-06	CEP128
14	rs759916	1.912e-14	4.592e-06	CEP128
14	rs11385061	2.075e-14	4.641e-06	CEP128
14	rs35176982	1.399e-14	4.794e-06	CEP128
14	rs12896065	2.985e-13	4.896e-06	CEP128
14	rs1992973	3.143e-13	4.898e-06	CEP128
14	rs2596118	3.143e-13	4.898e-06	CEP128
14	rs7143407	1.383e-13	4.991e-06	CEP128
14	rs4523859	4.541e-13	5.005e-06	CEP128
14	rs7153979	1.497e-14	5.146e-06	CEP128
14	rs17614081	4.877e-13	5.277e-06	CEP128
14	rs17613911	1.12e-13	5.341e-06	CEP128
14	rs10546120	1.12e-13	5.341e-06	CEP128
14	rs12880014	1.138e-13	5.409e-06	CEP128
14	rs228121	2.624e-14	5.555e-06	CEP128
14	rs228120	4.959e-14	5.817e-06	CEP128
14	rs8003784	1.221e-13	5.837e-06	CEP128
14	rs12432357	1.221e-13	5.837e-06	CEP128
14	rs8006507	1.237e-13	5.87e-06	CEP128
14	rs2371457	1.919e-14	5.887e-06	CEP128
14	rs17542615	1.346e-13	5.9e-06	CEP128
14	rs7154132	1.048e-14	6.051e-06	CEP128
14	rs228111	1.143e-13	6.434e-06	CEP128
14	rs7148618	1.563e-13	6.601e-06	CEP128
14	rs7141130	1.47e-13	6.649e-06	CEP128
14	rs8006864	1.47e-13	6.649e-06	AC022404.1
14	rs71416852	1.12e-13	6.679e-06	AC022404.1
14	rs11623023	1.491e-13	6.816e-06	CEP128
14	rs12431821	1.531e-13	6.968e-06	CEP128
14	rs61979451	1.531e-13	6.968e-06	CEP128
14	rs61979448	1.55e-13	6.968e-06	CEP128
14	rs12886388	1.55e-13	6.968e-06	CEP128
14	rs2371416	1.55e-13	6.968e-06	CEP128
14	rs61979452	1.55e-13	6.968e-06	CEP128
14	rs1458993	1.463e-13	7.287e-06	CEP128
14	rs7148368	4.045e-14	7.552e-06	AC022404.1
14	rs7150858	4.088e-14	7.552e-06	CEP128
14	rs61979449	1.074e-13	7.557e-06	CEP128
14	rs12434564	1.104e-13	8.544e-06	AC022404.1
14	rs2044738	5.813e-14	8.892e-06	AC022404.1
14	rs12888082	1.801e-13	9.867e-06	CEP128
14	rs7141434	6.011e-13	1.625e-05	CEP128

## Sheet: with without gene ame
Discovery			Replication
CHR	SNP	UNADJ	UNADJ	geneID		Discovery	<5*10-8	with/without gene ame?
6	rs143982339	1.661e-24	1.673e-11	ABCF1		Replication	<1.75*10-5
6	rs9380181	2.976e-22	5.013e-11	ABCF1
6	rs117474927	4.241e-12	7.487e-10	ABCF1
6	rs139336381	4.114e-18	1.632e-07	ABHD16A
14	rs3783943	9.034e-18	1.994e-09	AC007262.1
14	rs17111365	3.804e-18	5.962e-09	AC007262.1
14	rs2284730	7.591e-19	1.419e-08	AC007262.1
14	rs4903964	2.879e-18	1.813e-08	AC007262.1
14	rs7152373	3.17e-18	1.825e-08	AC007262.1
14	rs55957493	1.58e-18	2.069e-08	AC007262.1
14	rs55960644	1.584e-18	2.069e-08	AC007262.1
14	rs60462373	2.871e-18	3.092e-08	AC007262.1
14	rs58417382	5.623e-18	4.59e-08	AC007262.1
14	rs58266067	5.623e-18	4.59e-08	AC007262.1
14	rs58241131	5.781e-18	4.59e-08	AC007262.1
14	rs8006864	1.47e-13	6.649e-06	AC022404.1
14	rs71416852	1.12e-13	6.679e-06	AC022404.1
14	rs7148368	4.045e-14	7.552e-06	AC022404.1
14	rs12434564	1.104e-13	8.544e-06	AC022404.1
14	rs2044738	5.813e-14	8.892e-06	AC022404.1
6	rs2070600	2.959e-09	1.272e-05	AGER
6	rs9391855	2.171e-09	1.316e-05	AGER
6	rs9501161	4.305e-10	9.564e-06	AL645922.1
6	rs34140409	1.778e-10	1.083e-05	AL645922.1
6	rs2523684	2.075e-19	1.749e-08	AL645933.1
6	rs9394070	8.181e-24	1.613e-10	AL645933.2
6	rs12665401	7.538e-10	5.594e-08	AL645939.2
6	rs75791723	2.388e-16	1.478e-08	AL645939.4
6	rs113356849	4.505e-13	1.61e-08	AL662789.1
6	rs112037412	1.955e-14	2.329e-08	AL662789.1
6	rs111495201	1.955e-14	2.329e-08	AL662789.1
6	rs73396625	1.955e-14	2.329e-08	AL662789.1
6	rs375407646	8.601e-14	2.65e-08	AL662789.1
6	rs117416277	1.985e-17	5.074e-10	AL662795.2
6	rs143804865	9.105e-11	5.817e-10	AL662797.1
6	rs10947158	1.871e-29	1.214e-10	AL662844.1
6	rs3130949	1.4e-22	5.382e-10	AL662844.1
6	rs2394886	1.463e-22	2.132e-09	AL662844.1
6	rs4590261	1.806e-08	1.024e-06	AL662844.1
6	rs4455663	1.907e-08	1.112e-06	AL662844.1
6	rs3130945	4.782e-13	1.379e-05	AL662844.2
6	rs117333063	8.255e-30	2.652e-11	AL662844.3
6	rs4122190	6.518e-30	2.814e-11	AL662844.3
6	rs28483421	3.941e-30	3.112e-11	AL662844.3
6	rs10807081	5.416e-20	6.157e-11	AL662844.3
6	rs34467061	1.215e-15	5.994e-10	AL662844.3
6	rs34075705	2.944e-15	6.029e-10	AL662844.3
6	rs4122189	4.525e-16	7.091e-10	AL662844.3
6	rs9366769	5.962e-16	7.116e-10	AL662844.3
6	rs28397285	5.5e-16	7.137e-10	AL662844.3
6	rs28397274	8.461e-16	7.968e-10	AL662844.3
6	rs28360065	9.02e-16	8.39e-10	AL662844.3
6	rs28360066	9.02e-16	8.39e-10	AL662844.3
6	rs28397268	9.02e-16	8.39e-10	AL662844.3
6	rs6922077	9.1e-16	8.559e-10	AL662844.3
6	rs6901685	9.1e-16	8.559e-10	AL662844.3
6	rs6922553	9.1e-16	8.559e-10	AL662844.3
6	rs6922756	9.1e-16	8.559e-10	AL662844.3
6	rs28397271	9.1e-16	8.559e-10	AL662844.3
6	rs28397272	9.1e-16	8.559e-10	AL662844.3
6	rs28397273	9.1e-16	8.559e-10	AL662844.3
6	rs6922744	5.947e-16	8.958e-10	AL662844.3
6	rs6922729	5.947e-16	8.958e-10	AL662844.3
6	rs28397282	4.406e-16	9.336e-10	AL662844.3
6	rs28397270	6.403e-16	9.635e-10	AL662844.3
6	rs9295960	8.677e-16	9.678e-10	AL662844.3
6	rs9391819	8.677e-16	9.678e-10	AL662844.3
6	rs9394042	9.244e-16	1.011e-09	AL662844.3
6	rs11381232	9.244e-16	1.011e-09	AL662844.3
6	rs9380223	9.244e-16	1.011e-09	AL662844.3
6	rs9380222	1.448e-15	1.176e-09	AL662844.3
6	rs28397275	3.335e-15	1.467e-09	AL662844.3
6	rs28397276	3.583e-15	1.576e-09	AL662844.3
6	rs9391712	3.583e-15	1.576e-09	AL662844.3
6	rs28360067	3.652e-15	1.802e-09	AL662844.3
6	rs28397286	3.69e-15	1.839e-09	AL662844.3
6	rs9263869	1.732e-12	2.226e-08	AL662844.3
6	rs9263875	7.361e-12	1.574e-07	AL662844.3
6	rs9501073	5.749e-12	2.79e-07	AL662844.3
6	rs9263871	1.34e-08	7.976e-07	AL662844.3
6	rs28362342	8.262e-09	1.252e-06	AL662844.3
6	rs28362345	8.262e-09	1.265e-06	AL662844.3
6	rs9378226	4.054e-30	4.71e-11	AL662844.4
6	rs28360064	4.875e-16	7.546e-10	AL662844.4
6	rs6899874	9.244e-16	1.011e-09	AL662844.4
6	rs9295958	3.146e-15	1.62e-09	AL662844.4
6	rs7755702	3.412e-15	1.839e-09	AL662844.4
6	rs28360060	3.69e-15	1.839e-09	AL662844.4
6	rs28360062	3.69e-15	1.839e-09	AL662844.4
6	rs28360063	3.69e-15	1.839e-09	AL662844.4
6	rs6936474	3.69e-15	1.839e-09	AL662844.4
6	rs6936597	3.69e-15	1.839e-09	AL662844.4
6	rs6941912	3.69e-15	1.839e-09	AL662844.4
6	rs7741829	6.234e-12	3.294e-07	AL662844.4
6	rs7764668	1.073e-08	1.26e-06	AL662844.4
6	rs2285793	7.565e-11	2.819e-07	AL662860.1
6	rs9393967	1.234e-13	1.798e-06	AL662860.1
6	rs118090768	1.09e-08	1.55e-05	AL662884.2
6	rs118062293	9.955e-18	4.493e-07	AL662899.1
6	rs9348874	8.495e-24	2.458e-09	AL663061.1
6	rs9267431	3.087e-08	4.893e-06	AL663061.1
6	rs9260034	2.172e-08	1.061e-10	AL671277.1
6	rs9260035	2.172e-08	1.061e-10	AL671277.1
6	rs9260014	2.091e-08	1.122e-10	AL671277.1
6	rs3884198	2.091e-08	1.122e-10	AL671277.1
6	rs453325	2.091e-08	1.122e-10	AL671277.1
6	rs9280783	2.091e-08	1.122e-10	AL671277.1
6	rs451318	2.091e-08	1.122e-10	AL671277.1
6	rs9260025	2.091e-08	1.122e-10	AL671277.1
6	rs9260030	2.091e-08	1.122e-10	AL671277.1
6	rs9260031	2.091e-08	1.122e-10	AL671277.1
6	rs9260066	2.091e-08	1.122e-10	AL671277.1
6	rs9260068	2.091e-08	1.122e-10	AL671277.1
6	rs440674	2.294e-08	1.166e-10	AL671277.1
6	rs9260048	2.221e-08	1.625e-10	AL671277.1
6	rs9260260	2.024e-08	1.795e-10	AL671277.1
6	rs9260044	3.118e-08	2.122e-10	AL671277.1
6	rs9260257	2.571e-08	2.188e-10	AL671277.1
6	rs9260026	9.235e-09	4.099e-09	AL671277.1
6	rs9260041	9.235e-09	4.099e-09	AL671277.1
6	rs402850	9.235e-09	4.099e-09	AL671277.1
6	rs78179089	9.235e-09	4.099e-09	AL671277.1
6	rs9260060	8.838e-09	4.606e-09	AL671277.1
6	rs9260061	8.838e-09	4.606e-09	AL671277.1
6	rs9380242	4.836e-19	2.189e-11	AL671883.1
6	rs9357124	2.573e-18	9.395e-10	AL671883.1
6	rs9368677	2.889e-18	9.518e-10	AL671883.1
6	rs28600230	2.76e-18	1.586e-09	AL671883.1
6	rs6930660	2.468e-17	2.685e-09	AL671883.1
6	rs6457375	3.721e-11	4.073e-06	AL671883.1
6	rs6926927	2.978e-13	6.536e-06	AL671883.1
6	rs2853916	2.397e-09	9.288e-06	AL671883.1
6	rs7770635	5.135e-12	1.011e-05	AL671883.1
6	rs77078553	5.135e-12	1.011e-05	AL671883.1
6	rs9368673	5.135e-12	1.011e-05	AL671883.1
6	rs9368674	5.135e-12	1.011e-05	AL671883.1
6	rs34411813	5.135e-12	1.011e-05	AL671883.1
6	rs9394055	5.135e-12	1.011e-05	AL671883.1
6	rs9368679	5.135e-12	1.011e-05	AL671883.1
6	rs9368680	5.135e-12	1.011e-05	AL671883.1
6	rs9394056	5.135e-12	1.011e-05	AL671883.1
6	rs9357125	5.135e-12	1.011e-05	AL671883.1
6	rs150201065	5.135e-12	1.011e-05	AL671883.1
6	rs66803894	5.135e-12	1.011e-05	AL671883.1
6	rs9366779	5.135e-12	1.011e-05	AL671883.1
6	rs9394057	5.135e-12	1.011e-05	AL671883.1
6	rs68163013	5.135e-12	1.011e-05	AL671883.1
6	rs6930944	5.135e-12	1.011e-05	AL671883.1
6	rs9368675	5.301e-12	1.011e-05	AL671883.1
6	rs7750269	5.412e-12	1.011e-05	AL671883.1
6	rs7761515	5.339e-12	1.019e-05	AL671883.1
6	rs9368678	5.146e-12	1.037e-05	AL671883.1
6	rs7760988	5.149e-12	1.037e-05	AL671883.1
6	rs7750695	5.11e-12	1.153e-05	AL671883.1
6	rs142459005	5.976e-32	2.703e-12	AL671883.2
6	rs9391848	3.382e-20	6.511e-11	AL671883.2
6	rs9266095	2.735e-13	1.088e-10	AL671883.2
6	rs9391724	1.438e-20	6.326e-10	AL671883.2
6	rs9266094	1.789e-15	8.522e-10	AL671883.2
6	rs9391847	3.096e-10	1.419e-08	AL671883.2
6	rs2442719	2.009e-12	4.428e-08	AL671883.2
6	rs9405083	2.447e-09	9.748e-08	AL671883.2
6	rs1056429	6.979e-14	1.164e-06	AL671883.2
6	rs9378247	6.804e-11	1.416e-05	AL671883.2
6	rs2507993	2.366e-09	1.695e-05	AL671883.2
6	rs143128695	2.976e-22	5.013e-11	ATAT1
6	rs117369084	9.324e-09	1.513e-05	ATF6B
6	rs9366785	8.347e-19	5.344e-08	BAG6
6	rs117654464	1.434e-12	4.903e-06	BTNL2
6	rs6457566	1.551e-12	4.903e-06	BTNL2
6	rs17208706	1.551e-12	4.903e-06	BTNL2
6	rs117026188	1.551e-12	4.903e-06	BTNL2
6	rs117393793	1.481e-12	4.988e-06	BTNL2
6	rs9405097	1.18e-12	5.853e-06	BTNL2
6	rs117182798	1.237e-12	5.853e-06	BTNL2
6	rs9391860	1.18e-12	6.225e-06	BTNL2
6	rs9391859	1.137e-12	7.286e-06	BTNL2
6	rs9405096	1.137e-12	7.286e-06	BTNL2
6	rs3763311	1.406e-11	7.964e-06	BTNL2
6	rs9279637	1.501e-10	8.998e-06	BTNL2
6	rs9268499	1.637e-10	1.052e-05	BTNL2
6	rs118097312	1.838e-18	2.171e-07	C2
6	rs9391732	5.478e-15	3.244e-06	C4A
6	rs2233972	4.701e-21	8.37e-09	C6orf15
6	rs3095297	2.193e-12	6.052e-07	C6orf15
6	rs1062470	2.193e-12	6.052e-07	C6orf15
6	rs3130553	4.836e-11	1.092e-06	C6orf15
6	rs3130980	4.614e-12	1.201e-06	C6orf15
6	rs707913	4.788e-13	1.337e-06	C6orf15
6	rs3130554	2.936e-11	1.543e-06	C6orf15
6	rs2233970	1.246e-12	4.518e-06	C6orf15
6	rs2233984	4.173e-13	5.174e-06	C6orf15
6	rs2517473	3.184e-13	5.496e-06	C6orf15
6	rs4947302	3.904e-13	6.128e-06	C6orf15
6	rs4947246	3.904e-13	6.128e-06	C6orf15
6	rs9404978	3.904e-13	6.128e-06	C6orf15
6	rs10947135	3.904e-13	6.128e-06	C6orf15
6	rs78032704	3.904e-13	6.128e-06	C6orf15
6	rs2233983	3.904e-13	6.128e-06	C6orf15
6	rs9391709	4.157e-13	6.239e-06	C6orf15
6	rs2233973	3.953e-13	6.533e-06	C6orf15
6	rs2233985	8.124e-13	7.684e-06	C6orf15
6	rs4495304	3.583e-13	8.359e-06	C6orf15
6	rs3734854	9.56e-13	1.312e-05	C6orf15
6	rs28652698	3.568e-28	2.057e-11	CCHCR1
6	rs1265090	2.125e-20	1.428e-10	CCHCR1
6	rs1265082	1.835e-20	4.211e-10	CCHCR1
6	rs1265113	1.835e-20	4.211e-10	CCHCR1
6	rs1265107	2.399e-20	4.296e-10	CCHCR1
6	rs1265110	2.482e-20	4.296e-10	CCHCR1
6	rs28383832	1.703e-20	6.47e-10	CCHCR1
6	rs1265100	6.238e-14	2.026e-07	CCHCR1
6	rs1265095	4.048e-10	3.157e-07	CCHCR1
6	rs1265074	3.181e-15	3.947e-07	CCHCR1
6	rs3130453	3.575e-12	4.015e-07	CCHCR1
6	rs1265068	3.865e-15	4.111e-07	CCHCR1
6	rs130067	4.983e-15	4.66e-07	CCHCR1
6	rs1265089	3.186e-15	4.687e-07	CCHCR1
6	rs1966	4.233e-15	4.864e-07	CCHCR1
6	rs1265093	4.81e-15	5.978e-07	CCHCR1
6	rs6905862	8.884e-12	6.136e-07	CCHCR1
6	rs130066	1.367e-11	1.162e-06	CCHCR1
6	rs3819683	1.39e-26	4.828e-09	CDSN
6	rs3131002	2.258e-15	5.43e-07	CDSN
6	rs3094213	2.193e-12	6.052e-07	CDSN
6	rs3130990	2.193e-12	6.052e-07	CDSN
6	rs3130991	2.193e-12	6.052e-07	CDSN
6	rs2302399	2.193e-12	6.052e-07	CDSN
6	rs3091255	2.219e-12	6.052e-07	CDSN
6	rs3130996	1.518e-12	6.292e-07	CDSN
6	rs3131001	1.227e-12	6.297e-07	CDSN
6	rs2239521	1.113e-12	6.364e-07	CDSN
6	rs2239522	1.113e-12	6.364e-07	CDSN
6	rs3834327	1.251e-12	6.468e-07	CDSN
6	rs3130995	1.251e-12	6.468e-07	CDSN
6	rs3095313	1.251e-12	6.468e-07	CDSN
6	rs3094207	1.251e-12	6.468e-07	CDSN
6	rs3132544	1.872e-12	6.476e-07	CDSN
6	rs3095316	5.391e-12	1.358e-06	CDSN
6	rs1265045	1.016e-12	1.483e-06	CDSN
6	rs3094205	6.953e-12	1.571e-06	CDSN
6	rs3095312	2.639e-10	3.469e-06	CDSN
6	rs3130997	2.639e-10	3.469e-06	CDSN
6	rs3130999	2.262e-10	3.544e-06	CDSN
6	rs3131000	2.262e-10	3.544e-06	CDSN
6	rs3132543	3.216e-10	3.55e-06	CDSN
6	rs3095307	7.379e-12	6.892e-06	CDSN
6	rs3094206	1.831e-10	7.052e-06	CDSN
6	rs3094200	5.251e-12	7.344e-06	CDSN
6	rs3094203	4.601e-12	7.922e-06	CDSN
6	rs3095302	5.176e-12	8.195e-06	CDSN
14	rs35540104	1.207e-13	8.031e-07	CEP128
14	rs1016507	1.355e-13	8.221e-07	CEP128
14	rs228118	1.103e-13	1.017e-06	CEP128
14	rs2556605	2.691e-14	1.042e-06	CEP128
14	rs172920	1.955e-14	2.432e-06	CEP128
14	rs2217176	1.511e-14	2.633e-06	CEP128
14	rs728444	1.208e-13	3.028e-06	CEP128
14	rs228127	9.84e-15	3.161e-06	CEP128
14	rs2556601	1.68e-14	3.392e-06	CEP128
14	rs7154373	3.598e-14	3.618e-06	CEP128
14	rs12891585	1.134e-12	3.903e-06	CEP128
14	rs4903948	1.498e-14	4.042e-06	CEP128
14	rs2217174	7.241e-14	4.095e-06	CEP128
14	rs8021137	1.758e-14	4.104e-06	CEP128
14	rs1025253	1.463e-14	4.247e-06	CEP128
14	rs8022411	1.463e-14	4.247e-06	CEP128
14	rs8005883	2.242e-14	4.322e-06	CEP128
14	rs759916	1.912e-14	4.592e-06	CEP128
14	rs11385061	2.075e-14	4.641e-06	CEP128
14	rs35176982	1.399e-14	4.794e-06	CEP128
14	rs12896065	2.985e-13	4.896e-06	CEP128
14	rs1992973	3.143e-13	4.898e-06	CEP128
14	rs2596118	3.143e-13	4.898e-06	CEP128
14	rs7143407	1.383e-13	4.991e-06	CEP128
14	rs4523859	4.541e-13	5.005e-06	CEP128
14	rs7153979	1.497e-14	5.146e-06	CEP128
14	rs17614081	4.877e-13	5.277e-06	CEP128
14	rs17613911	1.12e-13	5.341e-06	CEP128
14	rs10546120	1.12e-13	5.341e-06	CEP128
14	rs12880014	1.138e-13	5.409e-06	CEP128
14	rs228121	2.624e-14	5.555e-06	CEP128
14	rs228120	4.959e-14	5.817e-06	CEP128
14	rs8003784	1.221e-13	5.837e-06	CEP128
14	rs12432357	1.221e-13	5.837e-06	CEP128
14	rs8006507	1.237e-13	5.87e-06	CEP128
14	rs2371457	1.919e-14	5.887e-06	CEP128
14	rs17542615	1.346e-13	5.9e-06	CEP128
14	rs7154132	1.048e-14	6.051e-06	CEP128
14	rs228111	1.143e-13	6.434e-06	CEP128
14	rs7148618	1.563e-13	6.601e-06	CEP128
14	rs7141130	1.47e-13	6.649e-06	CEP128
14	rs11623023	1.491e-13	6.816e-06	CEP128
14	rs12431821	1.531e-13	6.968e-06	CEP128
14	rs61979451	1.531e-13	6.968e-06	CEP128
14	rs61979448	1.55e-13	6.968e-06	CEP128
14	rs12886388	1.55e-13	6.968e-06	CEP128
14	rs2371416	1.55e-13	6.968e-06	CEP128
14	rs61979452	1.55e-13	6.968e-06	CEP128
14	rs1458993	1.463e-13	7.287e-06	CEP128
14	rs7150858	4.088e-14	7.552e-06	CEP128
14	rs61979449	1.074e-13	7.557e-06	CEP128
14	rs12888082	1.801e-13	9.867e-06	CEP128
14	rs7141434	6.011e-13	1.625e-05	CEP128
6	rs151115972	8.989e-18	3.63e-07	CLIC1
6	rs3128927	1.586e-09	8.822e-07	COL11A2P1
6	rs3128930	9.601e-09	2.753e-06	COL11A2P1
6	rs3130213	1.473e-08	8.733e-06	COL11A2P1
2	rs11571316	1.148e-12	5.653e-07	CTLA4
2	rs3087243	8.749e-13	6.086e-07	CTLA4
2	rs1427680	2.072e-14	8.15e-06	CTLA4
2	rs231779	1.831e-14	8.529e-06	CTLA4
2	rs231723	3.236e-14	9.247e-06	CTLA4
2	rs11571315	2.188e-14	9.432e-06	CTLA4
2	rs736611	2.186e-14	9.962e-06	CTLA4
2	rs7565213	8.52e-09	1.448e-05	CTLA4
2	rs11571302	6.59e-09	1.503e-05	CTLA4
6	rs371013749	3.52e-18	2.478e-08	DDR1
6	rs28362611	1.328e-18	6.555e-08	DDR1
6	rs9378150	3.929e-16	3.466e-07	DDR1
6	rs9404935	2.086e-16	3.593e-07	DDR1
6	rs9368645	2.388e-16	3.779e-07	DDR1
6	rs9366762	2.767e-16	4.654e-07	DDR1
6	rs151195028	5.74e-22	8.826e-12	DHX16
6	rs9380182	7.951e-24	1.158e-12	FLOT1
6	rs150971595	1.377e-17	5.386e-08	GABBR1
6	rs995185	8.838e-09	1.662e-05	GABBR1
6	rs9391895	1.115e-15	1.363e-06	GPR53P
6	rs2394402	1.114e-15	5.888e-07	HCG20
6	rs3130667	8.584e-16	7.477e-07	HCG20
6	rs3132602	8.584e-16	7.477e-07	HCG20
6	rs3131039	8.584e-16	7.477e-07	HCG20
6	rs7740279	9.009e-16	8.836e-07	HCG20
6	rs3129979	9.12e-16	9.61e-07	HCG20
6	rs9391637	1.721e-18	8.078e-08	HCG21
6	rs9368647	3.079e-18	1.266e-07	HCG21
6	rs9368648	1.27e-18	1.413e-07	HCG21
6	rs71732848	4.129e-18	4.328e-07	HCG21
6	rs9262622	1.136e-17	4.359e-07	HCG22
6	rs9262642	1.075e-17	4.47e-07	HCG22
6	rs9262636	7.515e-18	4.832e-07	HCG22
6	rs9262638	7.515e-18	4.832e-07	HCG22
6	rs9262639	7.515e-18	4.832e-07	HCG22
6	rs9262648	7.515e-18	4.832e-07	HCG22
6	rs9262616	1.812e-17	4.832e-07	HCG22
6	rs9262654	7.673e-18	4.862e-07	HCG22
6	rs9262618	1.119e-17	4.874e-07	HCG22
6	rs9262620	1.119e-17	4.874e-07	HCG22
6	rs9262633	1.119e-17	4.874e-07	HCG22
6	rs9262635	1.119e-17	4.874e-07	HCG22
6	rs9262637	1.119e-17	4.874e-07	HCG22
6	rs9262640	1.119e-17	4.874e-07	HCG22
6	rs9262641	1.119e-17	4.874e-07	HCG22
6	rs7741049	1.119e-17	4.874e-07	HCG22
6	rs7741474	1.119e-17	4.874e-07	HCG22
6	rs9262646	1.119e-17	4.874e-07	HCG22
6	rs9262647	1.119e-17	4.874e-07	HCG22
6	rs9278856	1.119e-17	4.874e-07	HCG22
6	rs9262650	1.119e-17	4.874e-07	HCG22
6	rs7356893	7.645e-18	4.892e-07	HCG22
6	rs3764808	7.799e-18	5.013e-07	HCG22
6	rs2394423	8.275e-18	5.029e-07	HCG22
6	rs9262630	4.384e-18	5.508e-07	HCG22
6	rs3906263	2.214e-17	8.658e-07	HCG22
6	rs9262651	5.624e-18	8.974e-07	HCG22
6	rs9295945	7.697e-18	9.057e-07	HCG22
6	rs9394032	8.524e-18	9.287e-07	HCG22
6	rs9380211	8.524e-18	9.287e-07	HCG22
6	rs9295946	8.524e-18	9.287e-07	HCG22
6	rs9295947	8.524e-18	9.287e-07	HCG22
6	rs9295948	8.524e-18	9.287e-07	HCG22
6	rs2394426	8.524e-18	9.287e-07	HCG22
6	rs2894048	8.524e-18	9.287e-07	HCG22
6	rs2394425	8.524e-18	9.287e-07	HCG22
6	rs9357106	8.524e-18	9.287e-07	HCG22
6	rs3888579	8.524e-18	9.287e-07	HCG22
6	rs2394427	8.049e-18	1.044e-06	HCG22
6	rs9262634	2.895e-17	1.163e-06	HCG22
6	rs7745521	2.895e-17	1.163e-06	HCG22
6	rs9281117	8.023e-18	1.605e-06	HCG22
6	rs9281119	2.553e-15	4.192e-06	HCG22
6	rs3132506	1.09e-22	2.874e-10	HCG27
6	rs1611627	7.292e-11	1.122e-09	HCG4P8
6	rs1628628	3.99e-11	3.249e-09	HCG4P8
6	rs12194291	1.682e-13	1.921e-07	HCG4P8
6	rs3823363	1.232e-08	5.422e-11	HCG9
6	rs2394252	2.187e-08	7.601e-11	HCG9
6	rs2394250	3.653e-08	7.38e-10	HCG9
6	rs9260809	3.318e-09	5.857e-09	HCG9
6	rs117116160	7.726e-33	1.227e-12	HCP5
6	rs117884751	2.558e-32	1.762e-12	HCP5
6	rs3763287	5.249e-25	1.413e-11	HCP5
6	rs2516471	1.107e-22	2.606e-11	HCP5
6	rs9357133	2.101e-22	2.707e-11	HCP5
6	rs2596466	5.155e-23	3.019e-11	HCP5
6	rs9380254	1.815e-22	3.255e-11	HCP5
6	rs2263323	1.228e-22	3.435e-11	HCP5
6	rs2524279	7.649e-22	1.257e-10	HCP5
6	rs114202986	4.604e-24	3.452e-10	HCP5
6	rs3763288	5.038e-24	3.875e-10	HCP5
6	rs2848709	5.637e-22	3.513e-09	HCP5
6	rs2524280	1.18e-19	3.523e-09	HCP5
6	rs9366783	4.148e-17	1.976e-08	HCP5
6	rs12174396	4.482e-17	1.976e-08	HCP5
6	rs2266161	2.986e-19	1.249e-07	HCP5
6	rs3828888	1.979e-10	1.678e-06	HCP5
6	rs4713467	1.705e-10	1.775e-06	HCP5
6	rs9404989	1.298e-10	1.846e-06	HCP5
6	rs12524498	3.286e-09	2.066e-06	HCP5
6	rs9260388	2.137e-08	6.609e-11	HLA-A
6	rs9260313	7.133e-09	1.391e-10	HLA-A
6	rs1655901	1.557e-09	5.483e-10	HLA-A
6	rs141618471	1.009e-31	2.308e-13	HLA-B
6	rs12524692	7.741e-29	1.761e-12	HLA-B
6	rs9380234	5.626e-21	3.448e-12	HLA-B
6	rs9391714	2.901e-21	4.408e-12	HLA-B
6	rs9378228	1.704e-31	4.476e-12	HLA-B
6	rs56356836	2.388e-21	4.535e-12	HLA-B
6	rs9405016	2.388e-21	4.535e-12	HLA-B
6	rs12529015	2.388e-21	4.535e-12	HLA-B
6	rs9368669	2.388e-21	4.535e-12	HLA-B
6	rs9357121	9.242e-22	4.977e-12	HLA-B
6	rs9366775	1.429e-21	5.838e-12	HLA-B
6	rs4298345	1.638e-21	6.464e-12	HLA-B
6	rs9394054	7.436e-19	1.498e-11	HLA-B
6	rs9368672	3.708e-19	1.754e-11	HLA-B
6	rs6918048	3.708e-19	1.846e-11	HLA-B
6	rs72860306	5.838e-28	2.162e-11	HLA-B
6	rs114985235	4.808e-19	2.189e-11	HLA-B
6	rs116589426	4.808e-19	2.189e-11	HLA-B
6	rs114151681	4.808e-19	2.189e-11	HLA-B
6	rs9380241	4.808e-19	2.189e-11	HLA-B
6	rs56244255	4.808e-19	2.243e-11	HLA-B
6	rs56334149	4.808e-19	2.243e-11	HLA-B
6	rs12526259	4.808e-19	2.243e-11	HLA-B
6	rs149308954	4.808e-19	2.243e-11	HLA-B
6	rs7761855	5e-19	2.321e-11	HLA-B
6	rs9368683	1.885e-18	3.116e-11	HLA-B
6	rs9405028	5.864e-19	3.952e-11	HLA-B
6	rs67494727	5.864e-19	3.952e-11	HLA-B
6	rs9405074	6.567e-19	4.144e-11	HLA-B
6	rs56262493	6.576e-19	4.438e-11	HLA-B
6	rs9295984	6.863e-19	4.438e-11	HLA-B
6	rs6906714	6.604e-19	4.501e-11	HLA-B
6	rs56280537	8.203e-19	4.608e-11	HLA-B
6	rs55674503	8.068e-19	4.645e-11	HLA-B
6	rs56353634	6.584e-19	4.749e-11	HLA-B
6	rs4527750	8.687e-19	4.854e-11	HLA-B
6	rs9391841	8.687e-19	4.854e-11	HLA-B
6	rs200335735	7.585e-19	4.908e-11	HLA-B
6	rs12174571	7.768e-19	4.908e-11	HLA-B
6	rs9391719	7.768e-19	4.908e-11	HLA-B
6	rs115813673	7.902e-19	4.908e-11	HLA-B
6	rs9391774	3.289e-19	4.953e-11	HLA-B
6	rs28771426	2.844e-18	5.013e-11	HLA-B
6	rs55813549	4.343e-19	5.032e-11	HLA-B
6	rs72502563	7.768e-19	5.146e-11	HLA-B
6	rs60091015	7.768e-19	5.146e-11	HLA-B
6	rs4492231	7.768e-19	5.146e-11	HLA-B
6	rs72502564	7.768e-19	5.146e-11	HLA-B
6	rs115034963	7.768e-19	5.146e-11	HLA-B
6	rs115190576	7.768e-19	5.146e-11	HLA-B
6	rs72502565	7.768e-19	5.146e-11	HLA-B
6	rs9295982	7.819e-19	5.146e-11	HLA-B
6	rs9391641	7.891e-19	5.146e-11	HLA-B
6	rs9295980	7.891e-19	5.146e-11	HLA-B
6	rs9283890	7.891e-19	5.146e-11	HLA-B
6	rs4311503	8.304e-19	5.146e-11	HLA-B
6	rs6919058	8.49e-19	5.146e-11	HLA-B
6	rs6942380	8.49e-19	5.146e-11	HLA-B
6	rs9378155	8.49e-19	5.146e-11	HLA-B
6	rs9378156	8.49e-19	5.146e-11	HLA-B
6	rs72502566	1.273e-18	5.306e-11	HLA-B
6	rs12173768	1.273e-18	5.306e-11	HLA-B
6	rs116685461	1.12e-18	6.018e-11	HLA-B
6	rs9405031	1.12e-18	6.018e-11	HLA-B
6	rs9391843	1.12e-18	6.018e-11	HLA-B
6	rs9378157	2.896e-18	6.543e-11	HLA-B
6	rs114317621	1.232e-18	7.388e-11	HLA-B
6	rs150527794	1.232e-18	7.388e-11	HLA-B
6	rs9380238	7.695e-14	7.736e-11	HLA-B
6	rs9394053	4.986e-19	8.45e-11	HLA-B
6	rs9348864	3.767e-19	8.512e-11	HLA-B
6	rs148136265	3.767e-19	8.512e-11	HLA-B
6	rs34540685	1.602e-18	9.044e-11	HLA-B
6	rs33998388	1.602e-18	9.044e-11	HLA-B
6	rs9391846	2.473e-19	1.631e-10	HLA-B
6	rs4260781	1.323e-12	1.634e-10	HLA-B
6	rs9391720	6.933e-13	2.083e-10	HLA-B
6	rs2523623	1.039e-12	3.105e-10	HLA-B
6	rs5021845	1.09e-12	3.105e-10	HLA-B
6	rs28771425	1.084e-12	3.338e-10	HLA-B
6	rs28771421	5.074e-13	3.522e-10	HLA-B
6	rs1634769	1.557e-12	4.662e-10	HLA-B
6	rs6912893	5.233e-17	5.519e-10	HLA-B
6	rs9394049	7.427e-18	6.497e-10	HLA-B
6	rs12234123	4.817e-18	6.773e-10	HLA-B
6	rs6919086	7.273e-19	7.331e-10	HLA-B
6	rs6919310	8.717e-18	7.843e-10	HLA-B
6	rs9391715	8.717e-18	7.843e-10	HLA-B
6	rs28771422	4.889e-13	9.861e-10	HLA-B
6	rs28367586	6.765e-18	1.026e-09	HLA-B
6	rs9394050	6.738e-18	1.087e-09	HLA-B
6	rs9380235	6.061e-18	1.115e-09	HLA-B
6	rs9380232	7.208e-18	1.122e-09	HLA-B
6	rs9295968	7.208e-18	1.122e-09	HLA-B
6	rs28380922	4.752e-13	1.122e-09	HLA-B
6	rs9394048	8.947e-18	1.292e-09	HLA-B
6	rs9391723	4.474e-13	1.322e-09	HLA-B
6	rs28380921	4.474e-13	1.322e-09	HLA-B
6	rs28563838	7.631e-18	1.451e-09	HLA-B
6	rs9265940	5.958e-13	1.92e-09	HLA-B
6	rs9405025	1.083e-18	2.011e-09	HLA-B
6	rs12525626	5.459e-18	2.013e-09	HLA-B
6	rs9391834	4.367e-18	2.121e-09	HLA-B
6	rs9405076	4.367e-18	2.121e-09	HLA-B
6	rs9378199	1.728e-18	2.218e-09	HLA-B
6	rs9405073	6.416e-18	2.532e-09	HLA-B
6	rs2524075	4.443e-18	2.583e-09	HLA-B
6	rs2523624	1.91e-09	2.594e-09	HLA-B
6	rs3130696	4.872e-18	2.64e-09	HLA-B
6	rs200983150	7.426e-19	2.951e-09	HLA-B
6	rs200291258	7.426e-19	2.951e-09	HLA-B
6	rs2596521	2.161e-09	3.018e-09	HLA-B
6	rs2853923	3.391e-14	4.272e-09	HLA-B
6	rs9357123	3.206e-14	5.068e-09	HLA-B
6	rs9265961	3.393e-11	5.083e-09	HLA-B
6	rs9348862	2.61e-14	1.417e-08	HLA-B
6	rs9366776	1.817e-14	1.434e-08	HLA-B
6	rs6921855	2.273e-14	1.434e-08	HLA-B
6	rs6899660	2.273e-14	1.434e-08	HLA-B
6	rs9348860	2.273e-14	1.434e-08	HLA-B
6	rs9348861	2.273e-14	1.434e-08	HLA-B
6	rs9368670	2.273e-14	1.434e-08	HLA-B
6	rs76141334	2.273e-14	1.434e-08	HLA-B
6	rs72861464	2.273e-14	1.434e-08	HLA-B
6	rs72861465	2.273e-14	1.434e-08	HLA-B
6	rs17198727	2.273e-14	1.434e-08	HLA-B
6	rs10947169	2.273e-14	1.434e-08	HLA-B
6	rs6939681	2.273e-14	1.434e-08	HLA-B
6	rs9357122	2.273e-14	1.434e-08	HLA-B
6	rs9394051	2.273e-14	1.434e-08	HLA-B
6	rs9394052	2.273e-14	1.434e-08	HLA-B
6	rs9295969	2.273e-14	1.434e-08	HLA-B
6	rs3873381	2.273e-14	1.434e-08	HLA-B
6	rs9380236	2.273e-14	1.449e-08	HLA-B
6	rs3873377	1.761e-14	1.456e-08	HLA-B
6	rs6916525	2.348e-14	1.464e-08	HLA-B
6	rs9368671	2.726e-14	1.501e-08	HLA-B
6	rs16899147	1.178e-14	1.515e-08	HLA-B
6	rs3873382	2.766e-14	1.65e-08	HLA-B
6	rs9348863	3.218e-14	1.657e-08	HLA-B
6	rs4397267	3.026e-16	1.867e-08	HLA-B
6	rs72861484	3.3e-14	2.067e-08	HLA-B
6	rs1634774	2.354e-08	2.33e-08	HLA-B
6	rs12173764	1.873e-16	2.347e-08	HLA-B
6	rs4637682	1.854e-16	2.563e-08	HLA-B
6	rs9366777	6.814e-14	5.171e-08	HLA-B
6	rs9265953	8.813e-10	1.923e-07	HLA-B
6	rs9265951	8.557e-10	1.961e-07	HLA-B
6	rs4361609	1.931e-15	2.503e-07	HLA-B
6	rs4713457	1.65e-12	3.617e-07	HLA-B
6	rs12526246	4.426e-08	5.973e-07	HLA-B
6	rs4713456	3.332e-12	7.271e-07	HLA-B
6	rs9265912	2.221e-08	1.102e-06	HLA-B
6	rs17192554	5.846e-10	1.477e-06	HLA-B
6	rs17198923	5.898e-10	1.484e-06	HLA-B
6	rs2524058	7.789e-11	2.283e-06	HLA-B
6	rs2524076	3.505e-15	2.53e-06	HLA-B
6	rs3094680	3.568e-15	2.53e-06	HLA-B
6	rs9266059	1.95e-11	2.583e-06	HLA-B
6	rs9265977	1.2e-09	2.583e-06	HLA-B
6	rs9265978	4.788e-10	2.872e-06	HLA-B
6	rs2523599	1.872e-14	3.029e-06	HLA-B
6	rs9265984	3.813e-10	3.305e-06	HLA-B
6	rs9265986	3.813e-10	3.305e-06	HLA-B
6	rs9265987	3.813e-10	3.305e-06	HLA-B
6	rs28481932	2.304e-13	4.335e-06	HLA-B
6	rs56229131	4.193e-19	4.855e-06	HLA-B
6	rs9348858	1.409e-18	5.31e-06	HLA-B
6	rs9368667	2.222e-19	5.937e-06	HLA-B
6	rs67156613	2.222e-19	5.937e-06	HLA-B
6	rs72860304	2.02e-19	6.021e-06	HLA-B
6	rs138928713	1.4e-18	6.177e-06	HLA-B
6	rs9380231	1.71e-18	9.18e-06	HLA-B
6	rs9368668	1.724e-18	9.18e-06	HLA-B
6	rs2853943	3.896e-10	9.857e-06	HLA-B
6	rs9391844	1.507e-09	1.028e-05	HLA-B
6	rs9391845	1.507e-09	1.028e-05	HLA-B
6	rs10807087	3.26e-19	1.076e-05	HLA-B
6	rs6906721	2.257e-12	1.139e-05	HLA-B
6	rs3132482	1.182e-08	1.431e-05	HLA-B
6	rs9394047	2.06e-18	1.73e-05	HLA-B
6	rs1126506	5.034e-12	4.972e-07	HLA-DPA1
6	rs1126504	4.611e-12	5.047e-07	HLA-DPA1
6	rs1126509	4.611e-12	5.047e-07	HLA-DPA1
6	rs2856821	1.731e-10	6.189e-07	HLA-DPA1
6	rs1126511	3.135e-12	6.252e-07	HLA-DPA1
6	rs1126513	2.798e-12	6.457e-07	HLA-DPA1
6	rs4501465	1.017e-15	6.745e-07	HLA-DPA1
6	rs9296073	1.017e-15	6.745e-07	HLA-DPA1
6	rs9296074	1.017e-15	6.745e-07	HLA-DPA1
6	rs1431402	2.469e-10	7.108e-07	HLA-DPA1
6	rs2021408	3.642e-10	7.366e-07	HLA-DPA1
6	rs9380340	1.302e-15	8.266e-07	HLA-DPA1
6	rs9394130	2.557e-15	9.978e-07	HLA-DPA1
6	rs2308927	1.043e-15	1.188e-06	HLA-DPA1
6	rs1126544	1.043e-15	1.188e-06	HLA-DPA1
6	rs1042153	1.734e-09	2.806e-06	HLA-DPA1
6	rs1126534	4.972e-15	6.389e-06	HLA-DPA1
6	rs1126533	4.972e-15	6.389e-06	HLA-DPA1
6	rs9277379	4.868e-08	6.573e-06	HLA-DPA1
6	rs79541122	5.908e-15	6.742e-06	HLA-DPA1
6	rs78103064	1.424e-15	6.758e-06	HLA-DPA1
6	rs60038796	4.908e-15	7.155e-06	HLA-DPA1
6	rs28449420	4.365e-16	7.385e-06	HLA-DPA1
6	rs9277381	4.265e-08	7.93e-06	HLA-DPA1
6	rs3841160	1.177e-17	1.036e-05	HLA-DPA1
6	rs12662112	1.177e-17	1.036e-05	HLA-DPA1
6	rs142544441	4.538e-15	1.196e-05	HLA-DPA1
6	rs2856816	9.177e-15	1.704e-05	HLA-DPA1
6	rs9277552	1.435e-09	5.065e-07	HLA-DPA2
6	rs3130201	6.812e-12	3.212e-06	HLA-DPA2
6	rs3128966	4.839e-08	6.573e-06	HLA-DPA2
6	rs3128965	4.794e-08	7.716e-06	HLA-DPA2
6	rs115566240	1.682e-17	3.041e-10	HLA-DQA1
6	rs17205191	1.461e-17	5.2e-10	HLA-DQA1
6	rs35585151	1.476e-17	8.826e-10	HLA-DQA1
6	rs35656734	1.333e-17	1.407e-09	HLA-DQA1
6	rs181534481	2.135e-17	3.042e-08	HLA-DQA1
6	rs139299944	2.909e-10	9.576e-08	HLA-DQA1
6	rs115738641	1.031e-15	3.385e-06	HLA-DQA1
6	rs139558884	3.24e-16	3.55e-06	HLA-DQA1
6	rs563648725	3.824e-16	5.486e-06	HLA-DQA1
6	rs74606007	4.914e-16	6.579e-06	HLA-DQA1
6	rs115016190	3.496e-16	6.696e-06	HLA-DQA1
6	rs146217951	3.496e-16	6.696e-06	HLA-DQA1
6	rs77639852	3.496e-16	6.696e-06	HLA-DQA1
6	rs78692977	3.496e-16	6.696e-06	HLA-DQA1
6	rs76822178	3.496e-16	6.696e-06	HLA-DQA1
6	rs79473311	3.496e-16	6.696e-06	HLA-DQA1
6	rs79573551	3.496e-16	6.696e-06	HLA-DQA1
6	rs555111717	3.319e-15	6.961e-06	HLA-DQA1
6	rs115908946	3.324e-16	6.987e-06	HLA-DQA1
6	rs114308959	5.505e-16	7.057e-06	HLA-DQA1
6	rs114088880	3.537e-16	7.065e-06	HLA-DQA1
6	rs115711192	3.637e-16	7.154e-06	HLA-DQA1
6	rs150015489	3.637e-16	7.154e-06	HLA-DQA1
6	rs114027542	3.637e-16	7.154e-06	HLA-DQA1
6	rs373813924	3.637e-16	7.154e-06	HLA-DQA1
6	rs146353211	3.637e-16	7.154e-06	HLA-DQA1
6	rs117055012	3.637e-16	7.154e-06	HLA-DQA1
6	rs114352945	3.637e-16	7.154e-06	HLA-DQA1
6	rs114762033	3.637e-16	7.154e-06	HLA-DQA1
6	rs563316064	3.637e-16	7.154e-06	HLA-DQA1
6	rs575430623	3.637e-16	7.154e-06	HLA-DQA1
6	rs371537406	3.637e-16	7.154e-06	HLA-DQA1
6	rs114799674	3.637e-16	7.154e-06	HLA-DQA1
6	rs115573799	3.637e-16	7.154e-06	HLA-DQA1
6	rs115503527	3.637e-16	7.154e-06	HLA-DQA1
6	rs28534011	3.637e-16	7.154e-06	HLA-DQA1
6	rs565181451	3.637e-16	7.154e-06	HLA-DQA1
6	rs545248976	3.637e-16	7.154e-06	HLA-DQA1
6	rs28417660	3.637e-16	7.154e-06	HLA-DQA1
6	rs372332783	3.637e-16	7.154e-06	HLA-DQA1
6	rs199950886	3.637e-16	7.154e-06	HLA-DQA1
6	rs114895321	3.637e-16	7.154e-06	HLA-DQA1
6	rs115717621	3.637e-16	7.154e-06	HLA-DQA1
6	rs114025574	3.637e-16	7.154e-06	HLA-DQA1
6	rs114774960	3.637e-16	7.154e-06	HLA-DQA1
6	rs115493697	3.637e-16	7.154e-06	HLA-DQA1
6	rs115139056	3.637e-16	7.154e-06	HLA-DQA1
6	rs559861992	3.637e-16	7.154e-06	HLA-DQA1
6	rs116236894	3.637e-16	7.154e-06	HLA-DQA1
6	rs115296161	3.637e-16	7.154e-06	HLA-DQA1
6	rs182013486	3.637e-16	7.154e-06	HLA-DQA1
6	rs184922584	3.637e-16	7.154e-06	HLA-DQA1
6	rs181184133	3.637e-16	7.154e-06	HLA-DQA1
6	rs549131306	3.637e-16	7.154e-06	HLA-DQA1
6	rs139727756	3.637e-16	7.154e-06	HLA-DQA1
6	rs114307619	3.672e-16	7.154e-06	HLA-DQA1
6	rs115609519	3.672e-16	7.154e-06	HLA-DQA1
6	rs114307375	3.672e-16	7.154e-06	HLA-DQA1
6	rs143117432	3.672e-16	7.154e-06	HLA-DQA1
6	rs147493459	3.672e-16	7.154e-06	HLA-DQA1
6	rs116573360	3.672e-16	7.154e-06	HLA-DQA1
6	rs576628433	3.672e-16	7.154e-06	HLA-DQA1
6	rs138816958	3.672e-16	7.154e-06	HLA-DQA1
6	rs138238823	3.672e-16	7.154e-06	HLA-DQA1
6	rs146406015	3.672e-16	7.154e-06	HLA-DQA1
6	rs139692935	3.672e-16	7.154e-06	HLA-DQA1
6	rs879665507	3.672e-16	7.154e-06	HLA-DQA1
6	rs115315696	3.672e-16	7.154e-06	HLA-DQA1
6	rs550642974	3.672e-16	7.154e-06	HLA-DQA1
6	rs115624624	3.672e-16	7.154e-06	HLA-DQA1
6	rs116202168	3.672e-16	7.154e-06	HLA-DQA1
6	rs114866528	3.672e-16	7.154e-06	HLA-DQA1
6	rs116633385	3.672e-16	7.154e-06	HLA-DQA1
6	rs116109088	3.672e-16	7.154e-06	HLA-DQA1
6	rs115214276	3.672e-16	7.154e-06	HLA-DQA1
6	rs116728358	3.672e-16	7.154e-06	HLA-DQA1
6	rs114310549	3.672e-16	7.154e-06	HLA-DQA1
6	rs115231411	3.672e-16	7.154e-06	HLA-DQA1
6	rs116485389	3.672e-16	7.154e-06	HLA-DQA1
6	rs536081339	3.672e-16	7.154e-06	HLA-DQA1
6	rs116517496	4.318e-16	7.328e-06	HLA-DQA1
6	rs116494205	6.93e-16	7.498e-06	HLA-DQA1
6	rs367728179	3.623e-16	7.565e-06	HLA-DQA1
6	rs9272140	3.623e-16	7.565e-06	HLA-DQA1
6	rs115223053	3.629e-16	7.565e-06	HLA-DQA1
6	rs114968544	4.539e-16	7.572e-06	HLA-DQA1
6	rs115700690	2.722e-16	7.949e-06	HLA-DQA1
6	rs1435796677	1.897e-10	7.949e-06	HLA-DQA1
6	rs1299721066	1.897e-10	7.949e-06	HLA-DQA1
6	rs28720766	4.078e-16	8.404e-06	HLA-DQA1
6	rs368699425	3.753e-16	8.768e-06	HLA-DQA1
6	rs28635391	8.668e-16	8.985e-06	HLA-DQA1
6	rs2002777	4.341e-12	1.218e-05	HLA-DQA1
6	rs9272226	3.878e-12	1.317e-05	HLA-DQA1
6	rs752245759	8.574e-16	1.507e-05	HLA-DQA1
6	rs375217182	1.825e-16	1.951e-08	HLA-DQB1
6	rs7743506	7.519e-16	7.208e-06	HLA-DQB1
6	rs6900039	4.86e-16	7.336e-06	HLA-DQB1
6	rs17205373	1.252e-18	8.08e-06	HLA-DQB1
6	rs9469112	3.301e-26	1.714e-10	HLA-DRA
6	rs16822660	1.358e-22	1.942e-08	HLA-DRA
6	rs9469113	2.495e-21	1.551e-07	HLA-DRA
6	rs16822599	1.411e-15	3.625e-06	HLA-DRA
6	rs9268644	5.962e-13	1.535e-05	HLA-DRA
6	rs3129870	3.442e-13	1.541e-05	HLA-DRA
6	rs11751673	1.923e-19	2.986e-11	HLA-DRB1
6	rs11756331	1.923e-19	2.986e-11	HLA-DRB1
6	rs11752229	1.923e-19	2.986e-11	HLA-DRB1
6	rs11756836	1.923e-19	2.986e-11	HLA-DRB1
6	rs7749350	1.923e-19	2.986e-11	HLA-DRB1
6	rs7753335	1.152e-14	1.632e-07	HLA-DRB1
6	rs148948227	3.559e-24	1.598e-10	HLA-DRB9
6	rs11753780	3.559e-24	1.626e-10	HLA-DRB9
6	rs9469129	3.693e-24	1.691e-10	HLA-DRB9
6	rs9469130	3.693e-24	1.691e-10	HLA-DRB9
6	rs7770920	3.508e-24	1.697e-10	HLA-DRB9
6	rs6457596	3.508e-24	1.697e-10	HLA-DRB9
6	rs111573974	3.508e-24	1.697e-10	HLA-DRB9
6	rs6924760	3.523e-24	1.714e-10	HLA-DRB9
6	rs9286789	3.523e-24	1.714e-10	HLA-DRB9
6	rs17203039	3.523e-24	1.714e-10	HLA-DRB9
6	rs11759730	3.523e-24	1.714e-10	HLA-DRB9
6	rs9461755	3.523e-24	1.714e-10	HLA-DRB9
6	rs9461756	3.523e-24	1.714e-10	HLA-DRB9
6	rs2071805	3.523e-24	1.714e-10	HLA-DRB9
6	rs61550563	3.523e-24	1.714e-10	HLA-DRB9
6	rs17209754	3.523e-24	1.714e-10	HLA-DRB9
6	rs17209768	3.523e-24	1.714e-10	HLA-DRB9
6	rs17203430	3.523e-24	1.714e-10	HLA-DRB9
6	rs17203444	3.523e-24	1.714e-10	HLA-DRB9
6	rs17209803	3.523e-24	1.714e-10	HLA-DRB9
6	rs17203458	3.523e-24	1.714e-10	HLA-DRB9
6	rs73729294	6.368e-24	2.465e-10	HLA-DRB9
6	rs9469120	6.384e-24	2.717e-10	HLA-DRB9
6	rs77332307	2.026e-15	6.674e-09	HLA-DRB9
6	rs76187645	1.904e-22	9.759e-09	HLA-DRB9
6	rs9501639	2.036e-22	1.009e-08	HLA-DRB9
6	rs9469126	1.298e-17	1.898e-08	HLA-DRB9
6	rs373939101	1.302e-17	1.912e-08	HLA-DRB9
6	rs189964538	1.302e-17	1.912e-08	HLA-DRB9
6	rs142774403	1.555e-17	2.335e-08	HLA-DRB9
6	rs59406271	2.067e-17	2.919e-08	HLA-DRB9
6	rs56083136	2.686e-21	1.711e-07	HLA-DRB9
6	rs9501640	2.686e-21	1.711e-07	HLA-DRB9
6	rs35286068	4.187e-21	2.184e-07	HLA-DRB9
6	rs10947290	2.299e-11	2.368e-07	HLA-DRB9
6	rs9269146	1.424e-14	6.656e-07	HLA-DRB9
6	rs7739302	6.208e-14	2.622e-06	HLA-DRB9
6	rs16897572	7.874e-13	1.963e-07	HLA-E
6	rs12207974	8.72e-09	2.203e-06	HLA-E
6	rs2078675	1.228e-08	2.605e-06	HLA-E
6	rs2105960	1.224e-08	5.932e-06	HLA-E
6	rs4711220	9.014e-09	7.588e-06	HLA-E
6	rs1264457	6.928e-12	9.757e-06	HLA-E
6	rs2735019	1.827e-08	1.335e-08	HLA-G
6	rs2523793	1.726e-08	1.346e-08	HLA-G
6	rs2517890	1.858e-08	1.346e-08	HLA-G
6	rs1611185	5.653e-11	3.65e-09	HLA-P
6	rs12524487	1.091e-23	7.226e-10	HLA-S
6	rs3020583	8.455e-12	1.677e-06	HLA-S
6	rs60478274	3.149e-08	2.246e-09	HLA-W
6	rs2517689	5.003e-08	2.332e-09	HLA-W
6	rs9391634	7.584e-26	1.654e-11	LINC00243
6	rs9348844	8.503e-18	6.756e-08	LINC00243
6	rs9380189	1.615e-09	1.853e-06	LINC00243
6	rs4711236	1.304e-09	3.783e-06	LINC00243
6	rs4711237	1.304e-09	3.783e-06	LINC00243
6	rs9295917	1.576e-09	3.828e-06	LINC00243
6	rs4587207	8.495e-10	3.921e-06	LINC00243
6	rs2394403	1.356e-09	4.147e-06	LINC00243
6	rs9295918	1.22e-09	4.17e-06	LINC00243
6	rs13213083	1.22e-09	4.17e-06	LINC00243
6	rs13213469	1.22e-09	4.17e-06	LINC00243
6	rs13198118	1.013e-09	4.195e-06	LINC00243
6	rs9378109	9.362e-10	4.445e-06	LINC00243
6	rs9380190	1.225e-09	4.508e-06	LINC00243
6	rs9380191	1.167e-09	4.636e-06	LINC00243
6	rs3888583	1.23e-09	4.637e-06	LINC00243
6	rs13213098	9.628e-10	4.656e-06	LINC00243
6	rs2269854	6.65e-10	4.664e-06	LINC00243
6	rs9380198	8.831e-10	4.746e-06	LINC00243
6	rs9404974	1.068e-09	4.793e-06	LINC00243
6	rs13191291	9.586e-10	4.864e-06	LINC00243
6	rs9368640	9.586e-10	4.864e-06	LINC00243
6	rs9394014	9.586e-10	4.864e-06	LINC00243
6	rs12525494	9.586e-10	4.864e-06	LINC00243
6	rs57403748	9.586e-10	4.864e-06	LINC00243
6	rs9295920	9.586e-10	4.864e-06	LINC00243
6	rs9391692	9.586e-10	4.864e-06	LINC00243
6	rs9404973	9.586e-10	4.864e-06	LINC00243
6	rs9391694	9.586e-10	4.864e-06	LINC00243
6	rs9380193	9.586e-10	4.864e-06	LINC00243
6	rs9380195	9.586e-10	4.864e-06	LINC00243
6	rs12528843	9.586e-10	4.864e-06	LINC00243
6	rs9404975	9.586e-10	4.864e-06	LINC00243
6	rs4713380	9.573e-10	4.881e-06	LINC00243
6	rs13191728	8.816e-10	5.203e-06	LINC00243
6	rs4713382	8.275e-10	5.222e-06	LINC00243
6	rs4713383	8.448e-10	5.222e-06	LINC00243
6	rs10947101	9.094e-10	5.276e-06	LINC00243
6	rs4248149	1.268e-09	5.311e-06	LINC00243
6	rs4713385	6.084e-10	5.367e-06	LINC00243
6	rs7751869	7.894e-10	5.41e-06	LINC00243
6	rs4947289	9.178e-10	5.41e-06	LINC00243
6	rs4713389	7.866e-10	5.506e-06	LINC00243
6	rs9368644	1.388e-09	5.54e-06	LINC00243
6	rs6905957	3.942e-10	5.601e-06	LINC00243
6	rs34154598	6.662e-10	5.671e-06	LINC00243
6	rs9295924	1.312e-09	5.895e-06	LINC00243
6	rs4713384	1.312e-09	5.895e-06	LINC00243
6	rs10947102	1.312e-09	5.895e-06	LINC00243
6	rs6901761	1.312e-09	5.895e-06	LINC00243
6	rs13201384	1.312e-09	5.895e-06	LINC00243
6	rs7751827	1.312e-09	5.895e-06	LINC00243
6	rs12661685	1.312e-09	5.895e-06	LINC00243
6	rs9378148	9.204e-10	6.071e-06	LINC00243
6	rs4947290	1.124e-09	6.108e-06	LINC00243
6	rs6901776	2.363e-09	6.928e-06	LINC00243
6	rs28381567	3.992e-09	7.129e-06	LINC00243
6	rs10947098	1.232e-09	7.43e-06	LINC00243
6	rs117589205	2.661e-16	1.803e-07	LINC02570
6	rs9357135	1.466e-25	1.962e-08	LST1
6	rs3828913	1.073e-19	8.515e-07	MICB
6	rs9267429	3.087e-08	4.893e-06	MICB
6	rs6908934	2.613e-08	5.147e-06	MICB
6	rs9267352	2.271e-08	5.474e-06	MICB
6	rs6910297	2.898e-08	6.214e-06	MICB
6	rs9380260	3.664e-08	7.707e-06	MICB
6	rs9267378	4.298e-08	1.32e-05	MICB
6	rs3893463	2.572e-09	5.859e-09	MICD
6	rs1633097	6.705e-11	1.123e-09	MICG
6	rs1633095	3.857e-11	1.943e-09	MICG
6	rs1633105	1.215e-10	4.628e-09	MICG
6	rs1610706	1.255e-10	4.911e-09	MICG
6	rs1610705	1.197e-10	4.961e-09	MICG
6	rs1736956	1.197e-10	4.961e-09	MICG
6	rs1077997	1.197e-10	4.961e-09	MICG
6	rs9380134	1.69e-13	1.098e-06	MOG
6	rs112802378	2.969e-14	2.023e-08	MTCO3P1
6	rs116953562	2.969e-14	2.023e-08	MTCO3P1
6	rs114931041	2.969e-14	2.023e-08	MTCO3P1
6	rs116823632	2.969e-14	2.023e-08	MTCO3P1
6	rs200518968	2.969e-14	2.023e-08	MTCO3P1
6	rs112057165	2.969e-14	2.023e-08	MTCO3P1
6	rs112941700	2.969e-14	2.023e-08	MTCO3P1
6	rs113556552	2.969e-14	2.023e-08	MTCO3P1
6	rs113413656	2.969e-14	2.023e-08	MTCO3P1
6	rs547480736	2.992e-14	2.023e-08	MTCO3P1
6	rs112678772	2.992e-14	2.047e-08	MTCO3P1
6	rs117736824	2.992e-14	2.047e-08	MTCO3P1
6	rs113738873	2.992e-14	2.047e-08	MTCO3P1
6	rs112947282	2.992e-14	2.047e-08	MTCO3P1
6	rs113380489	2.992e-14	2.047e-08	MTCO3P1
6	rs112512026	2.992e-14	2.047e-08	MTCO3P1
6	rs117392376	2.992e-14	2.047e-08	MTCO3P1
6	rs113919826	3.03e-14	2.047e-08	MTCO3P1
6	rs111808493	3.03e-14	2.047e-08	MTCO3P1
6	rs112679091	2.992e-14	2.082e-08	MTCO3P1
6	rs17615141	2.269e-14	3.346e-08	MTCO3P1
6	rs17206287	2.182e-17	4.175e-08	MTCO3P1
6	rs9275500	2.714e-18	1.152e-05	MTCO3P1
6	rs6909425	2.747e-08	1.429e-05	MUC21
6	rs9357105	2.342e-31	4.313e-12	MUC22
6	rs2844670	1.207e-13	2.757e-09	MUC22
6	rs2844665	2.699e-10	1.012e-06	MUC22
6	rs2844669	2.74e-10	1.012e-06	MUC22
6	rs2517552	1.802e-10	1.423e-06	MUC22
6	rs2844672	4.873e-10	1.427e-06	MUC22
6	rs2517553	7.609e-10	1.503e-06	MUC22
6	rs2844681	5.681e-10	2.253e-06	MUC22
6	rs2394429	9.024e-10	2.294e-06	MUC22
6	rs2394430	5.628e-10	3.484e-06	MUC22
6	rs71757905	2.215e-09	8.642e-06	MUC22
6	rs117295261	2.295e-23	3.29e-09	MUCL3
6	rs2286654	1.866e-18	7.041e-08	MUCL3
6	rs3131921	6.725e-15	1.782e-07	MUCL3
6	rs4711248	4.362e-18	1.93e-07	MUCL3
6	rs3217063	1.215e-13	1.741e-05	MUCL3
6	rs4711250	1.963e-18	1.536e-07	NAPGP2
6	rs9295937	1.907e-18	1.953e-07	NAPGP2
6	rs447903	3.457e-11	4.598e-08	NOTCH4
6	rs387071	2.652e-11	4.808e-08	NOTCH4
6	rs370055	3.642e-11	5.219e-08	NOTCH4
6	rs499691	3.642e-11	5.219e-08	NOTCH4
6	rs6902805	1.727e-14	1.452e-07	NOTCH4
6	rs9296012	1.466e-14	1.699e-07	NOTCH4
6	rs1475961	4.935e-10	1.866e-06	NOTCH4
6	rs3132950	4.935e-10	1.866e-06	NOTCH4
6	rs1475960	4.935e-10	1.866e-06	NOTCH4
6	rs3096691	4.935e-10	1.866e-06	NOTCH4
6	rs9267845	4.302e-10	1.868e-06	NOTCH4
6	rs2395105	3.965e-10	1.87e-06	NOTCH4
6	rs2395106	4.389e-10	1.969e-06	NOTCH4
6	rs532385	3.245e-12	3.834e-06	NOTCH4
6	rs9368601	9.983e-13	7.625e-06	OR10C1
6	rs7349908	2.667e-10	2.085e-06	OR11A1
6	rs9295805	2.181e-10	2.09e-06	OR11A1
6	rs9393959	1.932e-10	2.095e-06	OR11A1
6	rs7349875	1.932e-10	2.095e-06	OR11A1
6	rs7349876	1.932e-10	2.095e-06	OR11A1
6	rs9393960	2.405e-10	2.185e-06	OR11A1
6	rs10946990	2.098e-10	2.291e-06	OR11A1
6	rs10807056	2.602e-10	2.758e-06	OR11A1
6	rs7349863	2.695e-10	2.761e-06	OR11A1
6	rs9368600	7.217e-09	3.495e-06	OR11A1
6	rs12207410	2.129e-10	1.712e-06	OR12D1
6	rs12202249	2.521e-10	1.995e-06	OR12D1
6	rs9393957	2.769e-10	2.049e-06	OR12D1
6	rs9393958	2.089e-10	2.095e-06	OR12D1
6	rs12193979	2.158e-10	2.095e-06	OR12D1
6	rs3029487	3.039e-10	2.298e-06	OR12D1
6	rs9405124	3.231e-10	3.333e-06	OR12D2
6	rs9348829	2.891e-10	3.335e-06	OR12D2
6	rs2073152	2.891e-10	3.335e-06	OR12D2
6	rs1592404	3.067e-10	3.372e-06	OR12D2
6	rs147352225	6.723e-09	1.076e-05	OR2B3
6	rs9380123	2.726e-10	3.009e-06	OR5V1
6	rs1419635	8.72e-11	3.261e-06	OR5V1
6	rs10946988	2.891e-10	3.335e-06	OR5V1
6	rs1362061	3.985e-10	3.365e-06	OR5V1
6	rs2394608	2.868e-10	3.802e-06	OR5V1
6	rs9391817	1.643e-28	1.182e-11	POU5F1
6	rs6913070	2.105e-30	2.248e-11	POU5F1
6	rs117588763	2.882e-30	3.548e-11	POU5F1
6	rs9357112	2.882e-30	3.548e-11	POU5F1
6	rs9357114	2.882e-30	3.548e-11	POU5F1
6	rs9348855	2.882e-30	3.548e-11	POU5F1
6	rs4713439	3.473e-30	4.104e-11	POU5F1
6	rs1265163	1.989e-20	5.252e-10	POU5F1
6	rs1265160	7.056e-21	5.584e-10	POU5F1
6	rs9357113	1.403e-15	2.219e-09	POU5F1
6	rs9380221	1.403e-15	2.219e-09	POU5F1
6	rs9357109	2.591e-15	2.248e-09	POU5F1
6	rs915660	2.075e-15	2.855e-09	POU5F1
6	rs1052989	1.915e-15	2.989e-09	POU5F1
6	rs9380220	2.151e-15	3.152e-09	POU5F1
6	rs11967629	2.03e-15	3.477e-09	POU5F1
6	rs11507945	2.517e-15	3.716e-09	POU5F1
6	rs885950	5.871e-12	1.836e-07	POU5F1
6	rs9468882	5.172e-12	4.016e-07	POU5F1
6	rs887464	6.041e-12	5.383e-07	POU5F1
6	rs885951	3.5e-12	6.702e-07	POU5F1
6	rs2077010	4.12e-12	7.329e-07	POU5F1
6	rs13409	6.529e-12	1.049e-06	POU5F1
6	rs885952	2.21e-12	1.12e-06	POU5F1
6	rs1265156	7.354e-14	1.868e-06	POU5F1
6	rs7751130	1.108e-09	6.292e-06	POU5F1
6	rs9394040	1.544e-10	8.015e-06	POU5F1
6	rs9357111	1.544e-10	8.015e-06	POU5F1
6	rs3132520	1.546e-12	8.497e-06	POU5F1
6	rs3868542	2.096e-10	9.961e-06	POU5F1
6	rs3871248	2.096e-10	9.961e-06	POU5F1
6	rs9501066	2.096e-10	1.021e-05	POU5F1
6	rs9391816	2.251e-10	1.046e-05	POU5F1
6	rs887466	3.088e-10	1.071e-05	POU5F1
6	rs28383835	2.32e-10	1.15e-05	POU5F1
6	rs4947305	2.376e-10	1.152e-05	POU5F1
6	rs7770946	2.376e-10	1.152e-05	POU5F1
6	rs3871246	2.376e-10	1.152e-05	POU5F1
6	rs9368657	2.376e-10	1.152e-05	POU5F1
6	rs9368658	2.376e-10	1.152e-05	POU5F1
6	rs9357110	2.376e-10	1.152e-05	POU5F1
6	rs3871247	2.466e-10	1.162e-05	POU5F1
6	rs28383836	2.072e-10	1.335e-05	POU5F1
6	rs1265155	3.508e-10	1.415e-05	POU5F1
6	rs9348841	2.184e-24	1.854e-11	PPP1R10
6	rs2239888	2.421e-11	2.68e-10	PPP1R18
6	rs2844634	1.969e-14	4.393e-07	PSORS1C1
6	rs2844633	2.146e-14	5.754e-07	PSORS1C1
6	rs3132569	1.515e-12	3.851e-06	PSORS1C1
6	rs3130559	2.774e-13	4.081e-06	PSORS1C1
6	rs3132570	2.352e-12	4.241e-06	PSORS1C1
6	rs3094198	5.251e-12	7.217e-06	PSORS1C1
6	rs3094196	8.558e-13	1.394e-05	PSORS1C1
6	rs2021719	1.123e-08	5.593e-06	RANP1
6	rs9295898	1.219e-08	5.849e-06	RANP1
6	rs2021720	1.219e-08	5.849e-06	RANP1
6	rs6921669	1.219e-08	5.849e-06	RANP1
6	rs117133761	1.442e-17	3.33e-07	RF00019
6	rs9393991	1.241e-16	5.481e-11	RF00554
6	rs138020512	2.159e-09	5.308e-06	RF00554
6	rs12527394	3.327e-13	6.829e-06	RNU6-1133P
6	rs55756482	4.697e-13	9.422e-06	RNU6-1133P
6	rs9263477	4.697e-13	9.422e-06	RNU6-1133P
6	rs4713431	5.446e-13	9.972e-06	RNU6-1133P
6	rs9295949	3.221e-13	1.002e-05	RNU6-1133P
6	rs9295950	3.221e-13	1.002e-05	RNU6-1133P
6	rs9380215	4.265e-13	1.319e-05	RNU6-1133P
6	rs9380217	4.265e-13	1.319e-05	RNU6-1133P
6	rs910050	4.075e-11	1.448e-07	RNU6-603P
6	rs2076537	3.111e-11	1.5e-07	RNU6-603P
6	rs6907322	3.493e-11	1.75e-07	RNU6-603P
6	rs969891	4.652e-11	1.812e-07	RNU6-603P
6	rs3117121	4.652e-11	1.812e-07	RNU6-603P
6	rs3117120	4.652e-11	1.812e-07	RNU6-603P
6	rs2076539	4.652e-11	1.812e-07	RNU6-603P
6	rs3117122	3.979e-11	1.813e-07	RNU6-603P
6	rs1265763	2.845e-11	1.898e-07	RNU6-603P
6	rs969893	2.239e-11	1.902e-07	RNU6-603P
6	rs9268302	2.988e-11	1.944e-07	RNU6-603P
6	rs2223638	3.348e-11	2.303e-07	RNU6-603P
6	rs6930477	3.348e-11	2.303e-07	RNU6-603P
6	rs6907226	2.591e-11	2.409e-07	RNU6-603P
6	rs6149518	3.383e-11	2.428e-07	RNU6-603P
6	rs34298056	5.492e-11	4.012e-07	RNU6-603P
6	rs9368581	9.174e-11	1.521e-05	RNU6-930P
14	rs4903961	5.438e-20	1.325e-08	RPL17P3
14	rs4903962	6.084e-19	1.629e-08	RPL17P3
14	rs12323356	1.054e-18	1.715e-08	RPL17P3
14	rs2268459	6.613e-19	4.758e-08	RPL17P3
6	rs9296003	3.733e-15	1.884e-06	SKIV2L
6	rs12176594	7.635e-16	1.237e-07	SUCLA2P1
6	rs77072171	7.635e-16	1.237e-07	SUCLA2P1
6	rs9295895	3.542e-13	6.946e-07	SUCLA2P1
6	rs9461613	1.095e-08	3.494e-06	SUCLA2P1
6	rs13202930	1.616e-08	4.964e-06	SUCLA2P1
6	rs7761210	1.438e-08	5.088e-06	SUCLA2P1
6	rs12174870	1.373e-08	5.338e-06	SUCLA2P1
6	rs9295896	1.373e-08	5.338e-06	SUCLA2P1
6	rs35600573	1.373e-08	5.338e-06	SUCLA2P1
6	rs6929424	1.373e-08	5.338e-06	SUCLA2P1
6	rs9391763	3.496e-08	1.329e-05	SUCLA2P1
6	rs117689957	5.898e-18	9.16e-07	TNXB
6	rs117565607	4.478e-17	1.774e-10	TRIM26
6	rs117405699	8.43e-09	3.105e-06	TRIM26
6	rs4389802	3.37e-11	1.289e-07	TSBP1
6	rs9268314	4.729e-11	1.398e-07	TSBP1
6	rs1474727	5.219e-11	1.401e-07	TSBP1
6	rs3117134	3.499e-11	1.5e-07	TSBP1
6	rs3129902	4.652e-11	1.812e-07	TSBP1
6	rs3117136	4.652e-11	1.812e-07	TSBP1
6	rs7383143	4.652e-11	1.812e-07	TSBP1
6	rs9281746	4.652e-11	1.812e-07	TSBP1
6	rs2395147	4.652e-11	1.812e-07	TSBP1
6	rs3117131	4.652e-11	1.812e-07	TSBP1
6	rs9268303	2.936e-11	1.912e-07	TSBP1
6	rs1076712	3.308e-11	1.967e-07	TSBP1
6	rs9268361	2.889e-11	2.016e-07	TSBP1
6	rs6917075	1.525e-11	2.023e-07	TSBP1
6	rs9268315	7.451e-11	2.105e-07	TSBP1
6	rs3117130	1.503e-10	2.184e-07	TSBP1
6	rs9268330	3.348e-11	2.303e-07	TSBP1
6	rs6415129	3.348e-11	2.303e-07	TSBP1
6	rs9268350	3.348e-11	2.303e-07	TSBP1
6	rs9268364	3.348e-11	2.303e-07	TSBP1
6	rs9268367	3.348e-11	2.303e-07	TSBP1
6	rs9268347	2.797e-11	2.486e-07	TSBP1
6	rs9268378	3.323e-11	2.511e-07	TSBP1
6	rs6903816	3.323e-11	2.511e-07	TSBP1
6	rs1967437	3.323e-11	2.511e-07	TSBP1
6	rs9268365	3.611e-11	2.799e-07	TSBP1
6	rs9268356	4.137e-11	3.024e-07	TSBP1
6	rs7744155	6.881e-11	3.085e-07	TSBP1
6	rs9268325	3.182e-10	3.257e-07	TSBP1
6	rs71918165	8.473e-11	3.703e-07	TSBP1
6	rs2273019	1.18e-10	3.054e-06	TSBP1
6	rs3132954	4.595e-11	3.762e-06	TSBP1
6	rs3129942	6.037e-12	4.035e-06	TSBP1
6	rs2223636	1.073e-10	6.011e-06	TSBP1
6	rs147480718	1.065e-12	6.492e-06	TSBP1
6	rs9268399	8.173e-11	1.561e-05	TSBP1
6	rs9405095	1.137e-12	4.581e-06	TSBP1-AS1
6	rs9380292	1.137e-12	4.581e-06	TSBP1-AS1
6	rs117966254	1.083e-12	4.598e-06	TSBP1-AS1
6	rs117146138	7.675e-13	4.896e-06	TSBP1-AS1
6	rs145036746	1.842e-13	1.131e-05	TSBP1-AS1
14	rs2160215	4.445e-20	8.985e-09	TSHR
14	rs1023586	4.445e-20	8.985e-09	TSHR
14	rs28414437	1.053e-19	1.248e-08	TSHR
14	rs11159479	1.683e-18	2.976e-08	TSHR
14	rs56389234	1.683e-18	2.976e-08	TSHR
14	rs6574617	4.087e-18	3.458e-08	TSHR
14	rs10145099	4.828e-18	3.924e-08	TSHR
14	rs2371463	6.641e-18	4.222e-08	TSHR
14	rs724170	2.069e-17	5.364e-08	TSHR
6	rs3869091	1.958e-16	4.385e-07	VARS2
6	rs9357103	1.958e-16	4.385e-07	VARS2
6	rs9380151	2.632e-17	2.421e-10	ZNRD1ASP
2	rs10490516	2.469e-12	2.305e-07	#N/A
2	rs231804	1.884e-12	2.573e-07	#N/A
2	rs231738	1.587e-12	2.72e-07	#N/A
2	rs231735	1.587e-12	2.72e-07	#N/A
2	rs6714925	1.587e-12	2.72e-07	#N/A
2	rs231734	1.587e-12	2.72e-07	#N/A
2	rs231733	1.587e-12	2.72e-07	#N/A
2	rs3116514	1.587e-12	2.72e-07	#N/A
2	rs3115969	1.587e-12	2.72e-07	#N/A
2	rs12986861	1.587e-12	2.72e-07	#N/A
2	rs863603	1.587e-12	2.72e-07	#N/A
2	rs144115812	1.63e-12	2.72e-07	#N/A
2	rs1968351	1.63e-12	2.72e-07	#N/A
2	chr2:203832143_TA_T	1.63e-12	2.72e-07	#N/A
2	rs61272514	1.63e-12	2.72e-07	#N/A
2	rs34461055	1.63e-12	2.72e-07	#N/A
2	rs231789	1.63e-12	2.72e-07	#N/A
2	rs231790	1.63e-12	2.72e-07	#N/A
2	rs231791	1.63e-12	2.72e-07	#N/A
2	rs231792	1.63e-12	2.72e-07	#N/A
2	rs231796	1.63e-12	2.72e-07	#N/A
2	rs2162606	1.63e-12	2.72e-07	#N/A
2	rs231797	1.63e-12	2.72e-07	#N/A
2	rs13033315	1.63e-12	2.72e-07	#N/A
2	rs11571303	1.63e-12	2.72e-07	#N/A
2	rs231799	1.63e-12	2.72e-07	#N/A
2	rs231800	1.63e-12	2.72e-07	#N/A
2	rs231806	1.63e-12	2.72e-07	#N/A
2	rs231810	1.63e-12	2.72e-07	#N/A
2	rs6715389	1.87e-12	2.752e-07	#N/A
2	rs231746	1.063e-12	3.025e-07	#N/A
2	rs35702010	2.071e-12	3.067e-07	#N/A
2	rs13030124	1.305e-12	3.21e-07	#N/A
2	rs231811	1.469e-12	3.431e-07	#N/A
2	rs34050244	1.679e-12	3.489e-07	#N/A
2	rs6745050	1.827e-12	3.53e-07	#N/A
2	rs1863800	6.789e-13	3.976e-07	#N/A
2	rs369966005	2.393e-12	4.023e-07	#N/A
2	rs376256365	2.393e-12	4.023e-07	#N/A
2	rs12990970	6.796e-13	4.065e-07	#N/A
2	rs34636506	1.843e-12	4.368e-07	#N/A
2	rs11571304	1.823e-12	4.565e-07	#N/A
2	rs1024162	4.738e-13	4.854e-07	#N/A
2	rs11571291	2.158e-13	4.902e-07	#N/A
2	rs5837881	3.081e-12	5.345e-07	#N/A
2	rs1024161	1.633e-14	5.066e-06	#N/A
2	rs2352546	4.557e-09	9.774e-06	#N/A
2	rs231775	1.689e-14	1.034e-05	#N/A
2	rs1991416	4.475e-09	1.054e-05	#N/A
2	rs1365965	3.522e-09	1.076e-05	#N/A
2	rs231763	1.972e-14	1.088e-05	#N/A
2	rs2882973	1.785e-09	1.269e-05	#N/A
2	rs11571297	1.317e-08	1.635e-05	#N/A
2	rs12992492	2.013e-12	1.682e-05	#N/A
2	rs4675372	2.013e-12	1.682e-05	#N/A
2	rs3116513	2.507e-12	1.687e-05	#N/A
2	rs67665411	2.027e-12	1.69e-05	#N/A
6	rs9380213	7.578e-31	1.54e-12	#N/A
6	rs3130689	1.109e-12	2.022e-11	#N/A
6	rs3130432	1.57e-12	2.144e-11	#N/A
6	rs3134749	1.57e-12	2.144e-11	#N/A
6	rs3130429	1.538e-12	2.203e-11	#N/A
6	rs199707618	1.625e-19	2.459e-11	#N/A
6	rs3134767	1.126e-12	2.554e-11	#N/A
6	rs34891015	1.126e-12	2.554e-11	#N/A
6	rs3130409	1.126e-12	2.554e-11	#N/A
6	rs3095245	1.126e-12	2.554e-11	#N/A
6	rs2394902	1.126e-12	2.554e-11	#N/A
6	rs3134754	1.126e-12	2.554e-11	#N/A
6	rs3130417	1.126e-12	2.554e-11	#N/A
6	rs35372932	1.711e-19	2.925e-11	#N/A
6	rs200433535	1.766e-19	2.927e-11	#N/A
6	rs11754183	1.157e-19	3.085e-11	#N/A
6	rs11752754	1.383e-19	3.212e-11	#N/A
6	rs9391681	3.044e-21	3.23e-11	#N/A
6	rs7771486	2.882e-30	3.548e-11	#N/A
6	rs7772153	4.889e-30	3.555e-11	#N/A
6	rs9405015	3.106e-30	4.35e-11	#N/A
6	rs144947541	3.106e-30	4.35e-11	#N/A
6	rs3134755	1.241e-12	5.595e-11	#N/A
6	rs3130533	1.468e-12	7.425e-11	#N/A
6	rs9368660	5.481e-30	8.725e-11	#N/A
6	rs7748472	2.56e-24	1.455e-10	#N/A
6	rs3132505	2.132e-22	1.498e-10	#N/A
6	rs3095247	1.02e-12	1.516e-10	#N/A
6	rs7748494	3.321e-24	1.563e-10	#N/A
6	rs10576068	3.507e-24	1.62e-10	#N/A
6	rs113008492	3.559e-24	1.626e-10	#N/A
6	rs9469133	3.559e-24	1.626e-10	#N/A
6	rs9469134	3.559e-24	1.626e-10	#N/A
6	rs9461758	3.559e-24	1.626e-10	#N/A
6	rs7748301	3.559e-24	1.626e-10	#N/A
6	rs146363103	4.97e-30	2.531e-10	#N/A
6	rs9380226	4.97e-30	2.531e-10	#N/A
6	rs1639106	3.367e-30	2.581e-10	#N/A
6	rs3134785	2.47e-22	3.397e-10	#N/A
6	rs9357117	4.998e-30	3.435e-10	#N/A
6	rs9368662	8.239e-16	4.836e-10	#N/A
6	rs9368655	2.096e-16	5.317e-10	#N/A
6	rs3130514	1.047e-21	7.322e-10	#N/A
6	rs2394907	5.426e-11	9.469e-10	#N/A
6	rs6921663	4.673e-16	1.078e-09	#N/A
6	rs9394024	3.703e-23	1.169e-09	#N/A
6	rs773337328	3.494e-20	1.279e-09	#N/A
6	rs9689836	4.98e-20	1.285e-09	#N/A
6	rs9689437	4.98e-20	1.285e-09	#N/A
6	rs6899875	2.009e-15	1.285e-09	#N/A
6	rs71542417	5.188e-20	1.292e-09	#N/A
6	rs74729707	5.267e-20	1.292e-09	#N/A
6	rs9368663	7.098e-16	1.297e-09	#N/A
6	chr6:31275465_G_GA	7.534e-18	1.332e-09	#N/A
6	rs12528622	1.707e-14	1.362e-09	#N/A
6	rs112927854	1.707e-14	1.362e-09	#N/A
6	rs68067315	1.707e-14	1.362e-09	#N/A
6	rs13191875	1.707e-14	1.362e-09	#N/A
6	rs13206007	1.707e-14	1.362e-09	#N/A
6	rs13206018	1.707e-14	1.362e-09	#N/A
6	rs17427431	1.707e-14	1.381e-09	#N/A
6	rs2394895	5.424e-22	1.431e-09	#N/A
6	rs10947315	2.877e-20	1.466e-09	#N/A
6	rs35122881	1.707e-14	1.496e-09	#N/A
6	rs3130424	1.772e-22	1.523e-09	#N/A
6	rs3130530	2.599e-22	1.523e-09	#N/A
6	rs2394894	2.599e-22	1.523e-09	#N/A
6	rs3132495	2.599e-22	1.523e-09	#N/A
6	rs3132515	3.065e-22	1.665e-09	#N/A
6	rs11757382	5.008e-19	1.683e-09	#N/A
6	rs6938928	5.008e-19	1.683e-09	#N/A
6	rs6938929	5.008e-19	1.683e-09	#N/A
6	rs34102154	5.008e-19	1.683e-09	#N/A
6	rs4713442	2.264e-15	1.684e-09	#N/A
6	rs28360056	2.264e-15	1.684e-09	#N/A
6	rs9357115	2.373e-15	1.684e-09	#N/A
6	rs9378115	2.373e-15	1.684e-09	#N/A
6	rs2760988	2.849e-19	1.705e-09	#N/A
6	rs3134762	1.957e-22	1.71e-09	#N/A
6	rs9270869	4.846e-19	1.97e-09	#N/A
6	chr6:31436393_A_AT	1.107e-22	2.056e-09	#N/A
6	rs1633075	4.465e-11	2.083e-09	#N/A
6	rs4713441	2.565e-15	2.09e-09	#N/A
6	rs28360055	2.565e-15	2.09e-09	#N/A
6	rs9391818	6.76e-15	2.74e-09	#N/A
6	rs2517683	1.67e-08	2.886e-09	#N/A
6	rs9368611	2.8e-18	3.599e-09	#N/A
6	rs1476570	1.313e-08	7.802e-09	#N/A
6	rs11752428	8.398e-21	8.53e-09	#N/A
6	rs11757500	8.398e-21	8.53e-09	#N/A
6	rs11752955	8.398e-21	8.53e-09	#N/A
6	rs2517887	2.137e-08	8.884e-09	#N/A
6	rs2523777	1.788e-08	9.582e-09	#N/A
6	rs35593555	1.211e-09	1.079e-08	#N/A
6	rs3130534	1.236e-09	1.079e-08	#N/A
6	rs2735008	8.792e-09	1.14e-08	#N/A
6	rs3129718	1.098e-13	1.27e-08	#N/A
6	rs139460958	2.817e-18	1.278e-08	#N/A
6	rs2735014	1.846e-08	1.312e-08	#N/A
6	rs2735011	1.827e-08	1.335e-08	#N/A
6	rs2735009	1.827e-08	1.335e-08	#N/A
6	rs2735004	1.827e-08	1.335e-08	#N/A
6	rs58551057	1.827e-08	1.335e-08	#N/A
6	rs2735003	1.827e-08	1.335e-08	#N/A
6	rs28565959	1.827e-08	1.335e-08	#N/A
6	rs9258538	1.827e-08	1.335e-08	#N/A
6	rs9280720	1.827e-08	1.335e-08	#N/A
6	rs2523774	1.827e-08	1.335e-08	#N/A
6	rs2734996	1.827e-08	1.335e-08	#N/A
6	rs2743937	2.149e-08	1.335e-08	#N/A
6	rs2517886	1.71e-08	1.359e-08	#N/A
6	rs2523773	2.243e-08	1.366e-08	#N/A
6	rs2735006	2.1e-08	1.367e-08	#N/A
6	rs369095149	2.545e-18	1.387e-08	#N/A
6	rs185093297	1.834e-18	1.541e-08	#N/A
6	rs2734998	1.735e-08	1.668e-08	#N/A
6	rs145570027	1.645e-18	1.67e-08	#N/A
6	rs9501641	8.667e-17	1.801e-08	#N/A
6	rs9378152	1.131e-20	1.818e-08	#N/A
6	rs9258537	1.797e-08	1.826e-08	#N/A
6	rs112918734	2.706e-14	1.916e-08	#N/A
6	rs113239320	2.969e-14	2.023e-08	#N/A
6	rs112919014	2.992e-14	2.052e-08	#N/A
6	rs112366663	2.992e-14	2.052e-08	#N/A
6	rs112825165	2.992e-14	2.052e-08	#N/A
6	rs112283910	2.992e-14	2.052e-08	#N/A
6	rs115595864	2.992e-14	2.052e-08	#N/A
6	rs115080293	2.992e-14	2.052e-08	#N/A
6	rs112289364	2.992e-14	2.052e-08	#N/A
6	rs113488175	2.992e-14	2.052e-08	#N/A
6	rs114265258	2.992e-14	2.052e-08	#N/A
6	rs112473439	2.992e-14	2.052e-08	#N/A
6	rs113362556	2.992e-14	2.052e-08	#N/A
6	rs1165567641	2.992e-14	2.052e-08	#N/A
6	rs1265612703	2.992e-14	2.052e-08	#N/A
6	rs111328907	2.992e-14	2.052e-08	#N/A
6	rs113846532	2.992e-14	2.052e-08	#N/A
6	rs111771687	2.992e-14	2.052e-08	#N/A
6	rs112837888	2.992e-14	2.052e-08	#N/A
6	rs113639666	2.992e-14	2.052e-08	#N/A
6	rs199677907	2.992e-14	2.052e-08	#N/A
6	rs111684284	2.992e-14	2.052e-08	#N/A
6	rs116474044	2.992e-14	2.052e-08	#N/A
6	rs142700936	2.992e-14	2.052e-08	#N/A
6	rs150369468	2.992e-14	2.052e-08	#N/A
6	rs113180107	2.992e-14	2.052e-08	#N/A
6	rs112643393	2.992e-14	2.052e-08	#N/A
6	rs111940765	2.992e-14	2.052e-08	#N/A
6	rs113404909	2.992e-14	2.052e-08	#N/A
6	rs112205942	2.992e-14	2.052e-08	#N/A
6	rs112576294	2.992e-14	2.052e-08	#N/A
6	rs75786451	2.992e-14	2.052e-08	#N/A
6	rs75444829	2.992e-14	2.052e-08	#N/A
6	rs76175267	2.992e-14	2.052e-08	#N/A
6	rs141860709	2.992e-14	2.052e-08	#N/A
6	rs112767544	2.992e-14	2.052e-08	#N/A
6	rs140055405	2.992e-14	2.052e-08	#N/A
6	rs112495399	2.992e-14	2.052e-08	#N/A
6	rs112394065	2.992e-14	2.052e-08	#N/A
6	rs111929630	2.992e-14	2.052e-08	#N/A
6	rs113853932	2.992e-14	2.052e-08	#N/A
6	rs116436080	2.992e-14	2.052e-08	#N/A
6	rs111258791	2.992e-14	2.052e-08	#N/A
6	rs111952567	2.992e-14	2.052e-08	#N/A
6	rs113702169	2.992e-14	2.052e-08	#N/A
6	rs115072775	2.992e-14	2.052e-08	#N/A
6	rs116552012	2.992e-14	2.052e-08	#N/A
6	rs113166495	2.992e-14	2.052e-08	#N/A
6	rs112230901	2.992e-14	2.052e-08	#N/A
6	rs149087871	2.992e-14	2.052e-08	#N/A
6	rs55974168	2.992e-14	2.052e-08	#N/A
6	rs113201741	3.101e-14	2.052e-08	#N/A
6	rs112097452	3.101e-14	2.052e-08	#N/A
6	rs199961461	3.101e-14	2.052e-08	#N/A
6	rs763185831	3.101e-14	2.052e-08	#N/A
6	rs112179735	3.101e-14	2.052e-08	#N/A
6	rs73405373	3.101e-14	2.052e-08	#N/A
6	rs114462637	3.101e-14	2.052e-08	#N/A
6	rs1275509449	3.101e-14	2.052e-08	#N/A
6	rs113542246	3.101e-14	2.052e-08	#N/A
6	rs111413563	3.101e-14	2.052e-08	#N/A
6	rs113467005	2.992e-14	2.082e-08	#N/A
6	rs1242150872	2.992e-14	2.082e-08	#N/A
6	rs112984203	2.984e-14	2.107e-08	#N/A
6	rs111670117	1.686e-14	2.239e-08	#N/A
6	rs28533694	4.322e-13	2.28e-08	#N/A
6	rs111723134	1.955e-14	2.329e-08	#N/A
6	rs115719910	1.955e-14	2.329e-08	#N/A
6	rs113186560	1.955e-14	2.329e-08	#N/A
6	rs73407315	3.032e-14	2.353e-08	#N/A
6	rs202093441	2.531e-14	2.532e-08	#N/A
6	rs112669309	1.816e-14	2.566e-08	#N/A
6	rs2735000	2.066e-08	2.832e-08	#N/A
6	rs115135952	2.244e-14	2.975e-08	#N/A
6	rs112044727	1.272e-13	3.327e-08	#N/A
6	rs585669	5.676e-16	3.39e-08	#N/A
6	rs1047074669	4.921e-14	3.43e-08	#N/A
6	rs1186034433	4.921e-14	3.43e-08	#N/A
6	rs17581061	2.455e-14	3.552e-08	#N/A
6	rs371087333	4.079e-14	3.568e-08	#N/A
6	rs67164457	7.202e-09	6.201e-08	#N/A
6	rs113154049	1.738e-13	6.32e-08	#N/A
6	rs112745211	4.428e-14	6.869e-08	#N/A
6	rs12174433	1.004e-15	8.457e-08	#N/A
6	rs199812614	3.166e-13	8.811e-08	#N/A
6	rs112116290	3.732e-14	1.002e-07	#N/A
6	chr6:32628785_G_GATAGGTTATAGTTCAATATTCCATTTTTATTCAATCTGTTCTTCTCT	9.215e-16	1.021e-07	#N/A
6	rs686250	1.928e-12	1.066e-07	#N/A
6	rs1554135881	1.069e-14	1.076e-07	#N/A
6	rs9404933	7.635e-16	1.237e-07	#N/A
6	rs74223639	7.635e-16	1.237e-07	#N/A
6	rs11756119	1.28e-14	1.632e-07	#N/A
6	rs9501633	2.686e-21	1.711e-07	#N/A
6	rs112794667	2.686e-21	1.711e-07	#N/A
6	rs11756633	1.16e-14	1.717e-07	#N/A
6	rs35820711	1.176e-14	1.717e-07	#N/A
6	rs2394447	3.144e-17	2.307e-07	#N/A
6	chr6:32356723_G_GA	3.056e-11	2.757e-07	#N/A
6	rs34065360	6.129e-19	3.041e-07	#N/A
6	rs9263847	1.286e-08	3.358e-07	#N/A
6	rs9263449	1.085e-17	3.935e-07	#N/A
6	rs7753892	5.172e-12	4.016e-07	#N/A
6	rs6918904	7.673e-18	4.862e-07	#N/A
6	rs2856695	3.384e-17	4.899e-07	#N/A
6	rs9262656	7.92e-18	4.994e-07	#N/A
6	rs7772290	4.455e-12	5.277e-07	#N/A
6	rs9262676	1.14e-17	5.543e-07	#N/A
6	rs9368661	1.579e-11	5.581e-07	#N/A
6	rs6909620	2.822e-13	6.482e-07	#N/A
6	rs147832398	3.674e-11	7.379e-07	#N/A
6	rs3095341	8.719e-17	7.514e-07	#N/A
6	rs373292445	3.517e-08	8.492e-07	#N/A
6	rs41315175	2.874e-17	8.842e-07	#N/A
6	rs3024247	1.159e-17	9.355e-07	#N/A
6	rs9263450	2.803e-17	9.442e-07	#N/A
6	rs9263218	2.895e-17	9.589e-07	#N/A
6	rs2517550	2.758e-10	1.012e-06	#N/A
6	rs12175179	1.751e-17	1.017e-06	#N/A
6	rs3891154	2.168e-17	1.018e-06	#N/A
6	rs2116263	1.124e-15	1.091e-06	#N/A
6	rs10947131	7.925e-18	1.126e-06	#N/A
6	rs2517539	6.64e-10	1.344e-06	#N/A
6	rs2523876	7.95e-10	1.366e-06	#N/A
6	rs2523873	1.858e-10	1.397e-06	#N/A
6	rs2523872	1.782e-10	1.414e-06	#N/A
6	rs2523874	4.916e-10	1.427e-06	#N/A
6	rs117199710	1.019e-15	1.458e-06	#N/A
6	rs602875	2.374e-08	1.51e-06	#N/A
6	rs2517548	3.266e-10	1.594e-06	#N/A
6	rs9394034	2.902e-17	1.647e-06	#N/A
6	rs2517537	3.24e-10	1.859e-06	#N/A
6	rs2523871	3.205e-10	1.921e-06	#N/A
6	rs2523870	3.205e-10	1.921e-06	#N/A
6	rs3131927	3.242e-10	1.938e-06	#N/A
6	rs2517538	2.751e-10	2.011e-06	#N/A
6	rs9263460	6.125e-13	2.051e-06	#N/A
6	rs2116261	1.485e-15	2.289e-06	#N/A
6	rs117508328	1.746e-15	2.381e-06	#N/A
6	rs117652223	1.746e-15	2.381e-06	#N/A
6	rs17606000	1.746e-15	2.381e-06	#N/A
6	rs146916103	1.746e-15	2.381e-06	#N/A
6	rs3130713	1.52e-13	2.44e-06	#N/A
6	rs117125720	6.41e-17	2.443e-06	#N/A
6	rs576957502	1.228e-17	2.67e-06	#N/A
6	rs3132531	1.609e-13	2.817e-06	#N/A
6	rs3132530	1.609e-13	2.817e-06	#N/A
6	rs3132529	1.609e-13	2.817e-06	#N/A
6	rs3132521	1.609e-13	2.817e-06	#N/A
6	rs9357141	8.368e-13	2.894e-06	#N/A
6	rs117831873	8.068e-13	2.913e-06	#N/A
6	rs114493852	1.733e-17	3.208e-06	#N/A
6	rs149490268	1.12e-17	3.328e-06	#N/A
6	rs114991247	8.494e-18	3.422e-06	#N/A
6	rs187751879	1.172e-15	3.451e-06	#N/A
6	rs3130513	2.157e-08	3.469e-06	#N/A
6	rs12526593	1.184e-17	3.506e-06	#N/A
6	rs145397816	9.323e-18	3.554e-06	#N/A
6	rs28836874	1.829e-12	3.564e-06	#N/A
6	rs146566004	1.097e-17	3.653e-06	#N/A
6	rs141308633	1.097e-17	3.653e-06	#N/A
6	rs144934262	1.097e-17	3.653e-06	#N/A
6	rs61341125	1.715e-15	3.714e-06	#N/A
6	rs4713555	1.319e-17	3.899e-06	#N/A
6	rs9271365	4.65e-09	4.617e-06	#N/A
6	rs118160129	4.435e-11	4.952e-06	#N/A
6	rs5025823	7.289e-15	4.998e-06	#N/A
6	rs5025824	7.289e-15	4.998e-06	#N/A
6	rs9275289	1.259e-11	5.023e-06	#N/A
6	rs148474360	1.881e-09	5.14e-06	#N/A
6	rs2894196	1.875e-20	5.188e-06	#N/A
6	rs9368695	1.4e-08	5.212e-06	#N/A
6	rs9275291	2.251e-12	5.315e-06	#N/A
6	rs10080488	1.373e-08	5.338e-06	#N/A
6	rs35712488	1.373e-08	5.338e-06	#N/A
6	rs7769823	1.373e-08	5.338e-06	#N/A
6	rs9295897	1.373e-08	5.338e-06	#N/A
6	rs7775268	1.373e-08	5.338e-06	#N/A
6	rs6457619	6.843e-12	5.714e-06	#N/A
6	rs5000634	7.001e-12	5.714e-06	#N/A
6	rs6457622	7.001e-12	5.714e-06	#N/A
6	rs7745040	7.001e-12	5.714e-06	#N/A
6	rs2894380	7.001e-12	5.714e-06	#N/A
6	rs9263572	5.646e-13	5.755e-06	#N/A
6	rs9263499	5.683e-13	5.755e-06	#N/A
6	rs2894179	5.683e-13	5.755e-06	#N/A
6	rs9263512	5.683e-13	5.755e-06	#N/A
6	rs9278969	5.683e-13	5.755e-06	#N/A
6	rs9263578	5.683e-13	5.755e-06	#N/A
6	rs151195548	2.222e-19	5.937e-06	#N/A
6	rs9394037	3.904e-13	6.128e-06	#N/A
6	rs9348854	3.904e-13	6.128e-06	#N/A
6	rs9357108	3.904e-13	6.128e-06	#N/A
6	rs9405049	3.904e-13	6.128e-06	#N/A
6	rs34209658	3.904e-13	6.128e-06	#N/A
6	rs35802713	3.904e-13	6.128e-06	#N/A
6	rs4947297	3.904e-13	6.128e-06	#N/A
6	rs4947299	3.904e-13	6.128e-06	#N/A
6	rs9368577	1.815e-08	6.24e-06	#N/A
6	rs9275297	1.701e-11	6.698e-06	#N/A
6	rs80002776	1.001e-08	6.743e-06	#N/A
6	rs117248572	5.724e-15	6.76e-06	#N/A
6	rs4947296	4.64e-13	6.828e-06	#N/A
6	rs12529288	3.327e-13	6.829e-06	#N/A
6	rs9461748	2.995e-18	7.099e-06	#N/A
6	rs3134768	2.26e-13	7.237e-06	#N/A
6	rs9393927	1.046e-08	7.301e-06	#N/A
6	rs150518666	1.678e-08	8.267e-06	#N/A
6	chr6:31108335_A_AT	3.614e-13	8.305e-06	#N/A
6	rs192622422	2.069e-09	8.502e-06	#N/A
6	rs9380219	7.655e-13	8.617e-06	#N/A
6	rs377160326	1.769e-10	8.74e-06	#N/A
6	rs17606006	6.153e-13	9.034e-06	#N/A
6	rs12527746	1.549e-15	9.804e-06	#N/A
6	rs2116262	1.033e-14	9.855e-06	#N/A
6	rs1554139238	1.621e-10	1.068e-05	#N/A
6	rs3130699	2.176e-13	1.129e-05	#N/A
6	rs9275380	2.136e-08	1.136e-05	#N/A
6	rs9275382	2.136e-08	1.136e-05	#N/A
6	rs576400044	1.954e-13	1.138e-05	#N/A
6	rs146593109	2.618e-08	1.188e-05	#N/A
6	rs2116260	5.475e-15	1.199e-05	#N/A
6	rs3130936	8.997e-13	1.301e-05	#N/A
6	rs73415233	4.274e-15	1.658e-05	#N/A
6	rs3130473	5.553e-13	1.682e-05	#N/A
6	rs12614	9.082e-10	1.72e-05	#N/A

## Sheet: with gene ame
Discovery			Replication
6	rs143982339	1.661e-24	1.673e-11	ABCF1		Discovery	<5*10-8	with gene name
6	rs9380181	2.976e-22	5.013e-11	ABCF1		Replication	<1.75*10-5
6	rs117474927	4.241e-12	7.487e-10	ABCF1
6	rs139336381	4.114e-18	1.632e-07	ABHD16A
14	rs2284730	7.591e-19	1.419e-08	AC007262.1
14	rs55957493	1.58e-18	2.069e-08	AC007262.1
14	rs55960644	1.584e-18	2.069e-08	AC007262.1
14	rs60462373	2.871e-18	3.092e-08	AC007262.1
14	rs4903964	2.879e-18	1.813e-08	AC007262.1
14	rs7152373	3.17e-18	1.825e-08	AC007262.1
14	rs17111365	3.804e-18	5.962e-09	AC007262.1
14	rs58417382	5.623e-18	4.59e-08	AC007262.1
14	rs58266067	5.623e-18	4.59e-08	AC007262.1
14	rs58241131	5.781e-18	4.59e-08	AC007262.1
14	rs3783943	9.034e-18	1.994e-09	AC007262.1
14	rs7148368	4.045e-14	7.552e-06	AC022404.1
14	rs2044738	5.813e-14	8.892e-06	AC022404.1
14	rs12434564	1.104e-13	8.544e-06	AC022404.1
14	rs71416852	1.12e-13	6.679e-06	AC022404.1
14	rs8006864	1.47e-13	6.649e-06	AC022404.1
6	rs9391855	2.171e-09	1.316e-05	AGER
6	rs2070600	2.959e-09	1.272e-05	AGER
6	rs34140409	1.778e-10	1.083e-05	AL645922.1
6	rs9501161	4.305e-10	9.564e-06	AL645922.1
6	rs2523684	2.075e-19	1.749e-08	AL645933.1
6	rs9394070	8.181e-24	1.613e-10	AL645933.2
6	rs12665401	7.538e-10	5.594e-08	AL645939.2
6	rs75791723	2.388e-16	1.478e-08	AL645939.4
6	rs112037412	1.955e-14	2.329e-08	AL662789.1
6	rs111495201	1.955e-14	2.329e-08	AL662789.1
6	rs73396625	1.955e-14	2.329e-08	AL662789.1
6	rs375407646	8.601e-14	2.65e-08	AL662789.1
6	rs113356849	4.505e-13	1.61e-08	AL662789.1
6	rs117416277	1.985e-17	5.074e-10	AL662795.2
6	rs143804865	9.105e-11	5.817e-10	AL662797.1
6	rs10947158	1.871e-29	1.214e-10	AL662844.1
6	rs3130949	1.4e-22	5.382e-10	AL662844.1
6	rs2394886	1.463e-22	2.132e-09	AL662844.1
6	rs4590261	1.806e-08	1.024e-06	AL662844.1
6	rs4455663	1.907e-08	1.112e-06	AL662844.1
6	rs3130945	4.782e-13	1.379e-05	AL662844.2
6	rs28483421	3.941e-30	3.112e-11	AL662844.3
6	rs4122190	6.518e-30	2.814e-11	AL662844.3
6	rs117333063	8.255e-30	2.652e-11	AL662844.3
6	rs10807081	5.416e-20	6.157e-11	AL662844.3
6	rs28397282	4.406e-16	9.336e-10	AL662844.3
6	rs4122189	4.525e-16	7.091e-10	AL662844.3
6	rs28397285	5.5e-16	7.137e-10	AL662844.3
6	rs6922744	5.947e-16	8.958e-10	AL662844.3
6	rs6922729	5.947e-16	8.958e-10	AL662844.3
6	rs9366769	5.962e-16	7.116e-10	AL662844.3
6	rs28397270	6.403e-16	9.635e-10	AL662844.3
6	rs28397274	8.461e-16	7.968e-10	AL662844.3
6	rs9295960	8.677e-16	9.678e-10	AL662844.3
6	rs9391819	8.677e-16	9.678e-10	AL662844.3
6	rs28360065	9.02e-16	8.39e-10	AL662844.3
6	rs28360066	9.02e-16	8.39e-10	AL662844.3
6	rs28397268	9.02e-16	8.39e-10	AL662844.3
6	rs6922077	9.1e-16	8.559e-10	AL662844.3
6	rs6901685	9.1e-16	8.559e-10	AL662844.3
6	rs6922553	9.1e-16	8.559e-10	AL662844.3
6	rs6922756	9.1e-16	8.559e-10	AL662844.3
6	rs28397271	9.1e-16	8.559e-10	AL662844.3
6	rs28397272	9.1e-16	8.559e-10	AL662844.3
6	rs28397273	9.1e-16	8.559e-10	AL662844.3
6	rs9394042	9.244e-16	1.011e-09	AL662844.3
6	rs11381232	9.244e-16	1.011e-09	AL662844.3
6	rs9380223	9.244e-16	1.011e-09	AL662844.3
6	rs34467061	1.215e-15	5.994e-10	AL662844.3
6	rs9380222	1.448e-15	1.176e-09	AL662844.3
6	rs34075705	2.944e-15	6.029e-10	AL662844.3
6	rs28397275	3.335e-15	1.467e-09	AL662844.3
6	rs28397276	3.583e-15	1.576e-09	AL662844.3
6	rs9391712	3.583e-15	1.576e-09	AL662844.3
6	rs28360067	3.652e-15	1.802e-09	AL662844.3
6	rs28397286	3.69e-15	1.839e-09	AL662844.3
6	rs9263869	1.732e-12	2.226e-08	AL662844.3
6	rs9501073	5.749e-12	2.79e-07	AL662844.3
6	rs9263875	7.361e-12	1.574e-07	AL662844.3
6	rs28362342	8.262e-09	1.252e-06	AL662844.3
6	rs28362345	8.262e-09	1.265e-06	AL662844.3
6	rs9263871	1.34e-08	7.976e-07	AL662844.3
6	rs9378226	4.054e-30	4.71e-11	AL662844.4
6	rs28360064	4.875e-16	7.546e-10	AL662844.4
6	rs6899874	9.244e-16	1.011e-09	AL662844.4
6	rs9295958	3.146e-15	1.62e-09	AL662844.4
6	rs7755702	3.412e-15	1.839e-09	AL662844.4
6	rs28360060	3.69e-15	1.839e-09	AL662844.4
6	rs28360062	3.69e-15	1.839e-09	AL662844.4
6	rs28360063	3.69e-15	1.839e-09	AL662844.4
6	rs6936474	3.69e-15	1.839e-09	AL662844.4
6	rs6936597	3.69e-15	1.839e-09	AL662844.4
6	rs6941912	3.69e-15	1.839e-09	AL662844.4
6	rs7741829	6.234e-12	3.294e-07	AL662844.4
6	rs7764668	1.073e-08	1.26e-06	AL662844.4
6	rs9393967	1.234e-13	1.798e-06	AL662860.1
6	rs2285793	7.565e-11	2.819e-07	AL662860.1
6	rs118090768	1.09e-08	1.55e-05	AL662884.2
6	rs118062293	9.955e-18	4.493e-07	AL662899.1
6	rs9348874	8.495e-24	2.458e-09	AL663061.1
6	rs9267431	3.087e-08	4.893e-06	AL663061.1
6	rs9260060	8.838e-09	4.606e-09	AL671277.1
6	rs9260061	8.838e-09	4.606e-09	AL671277.1
6	rs9260026	9.235e-09	4.099e-09	AL671277.1
6	rs9260041	9.235e-09	4.099e-09	AL671277.1
6	rs402850	9.235e-09	4.099e-09	AL671277.1
6	rs78179089	9.235e-09	4.099e-09	AL671277.1
6	rs9260260	2.024e-08	1.795e-10	AL671277.1
6	rs9260014	2.091e-08	1.122e-10	AL671277.1
6	rs3884198	2.091e-08	1.122e-10	AL671277.1
6	rs453325	2.091e-08	1.122e-10	AL671277.1
6	rs9280783	2.091e-08	1.122e-10	AL671277.1
6	rs451318	2.091e-08	1.122e-10	AL671277.1
6	rs9260025	2.091e-08	1.122e-10	AL671277.1
6	rs9260030	2.091e-08	1.122e-10	AL671277.1
6	rs9260031	2.091e-08	1.122e-10	AL671277.1
6	rs9260066	2.091e-08	1.122e-10	AL671277.1
6	rs9260068	2.091e-08	1.122e-10	AL671277.1
6	rs9260034	2.172e-08	1.061e-10	AL671277.1
6	rs9260035	2.172e-08	1.061e-10	AL671277.1
6	rs9260048	2.221e-08	1.625e-10	AL671277.1
6	rs440674	2.294e-08	1.166e-10	AL671277.1
6	rs9260257	2.571e-08	2.188e-10	AL671277.1
6	rs9260044	3.118e-08	2.122e-10	AL671277.1
6	rs9380242	4.836e-19	2.189e-11	AL671883.1
6	rs9357124	2.573e-18	9.395e-10	AL671883.1
6	rs28600230	2.76e-18	1.586e-09	AL671883.1
6	rs9368677	2.889e-18	9.518e-10	AL671883.1
6	rs6930660	2.468e-17	2.685e-09	AL671883.1
6	rs6926927	2.978e-13	6.536e-06	AL671883.1
6	rs7750695	5.11e-12	1.153e-05	AL671883.1
6	rs7770635	5.135e-12	1.011e-05	AL671883.1
6	rs77078553	5.135e-12	1.011e-05	AL671883.1
6	rs9368673	5.135e-12	1.011e-05	AL671883.1
6	rs9368674	5.135e-12	1.011e-05	AL671883.1
6	rs34411813	5.135e-12	1.011e-05	AL671883.1
6	rs9394055	5.135e-12	1.011e-05	AL671883.1
6	rs9368679	5.135e-12	1.011e-05	AL671883.1
6	rs9368680	5.135e-12	1.011e-05	AL671883.1
6	rs9394056	5.135e-12	1.011e-05	AL671883.1
6	rs9357125	5.135e-12	1.011e-05	AL671883.1
6	rs150201065	5.135e-12	1.011e-05	AL671883.1
6	rs66803894	5.135e-12	1.011e-05	AL671883.1
6	rs9366779	5.135e-12	1.011e-05	AL671883.1
6	rs9394057	5.135e-12	1.011e-05	AL671883.1
6	rs68163013	5.135e-12	1.011e-05	AL671883.1
6	rs6930944	5.135e-12	1.011e-05	AL671883.1
6	rs9368678	5.146e-12	1.037e-05	AL671883.1
6	rs7760988	5.149e-12	1.037e-05	AL671883.1
6	rs9368675	5.301e-12	1.011e-05	AL671883.1
6	rs7761515	5.339e-12	1.019e-05	AL671883.1
6	rs7750269	5.412e-12	1.011e-05	AL671883.1
6	rs6457375	3.721e-11	4.073e-06	AL671883.1
6	rs2853916	2.397e-09	9.288e-06	AL671883.1
6	rs142459005	5.976e-32	2.703e-12	AL671883.2
6	rs9391724	1.438e-20	6.326e-10	AL671883.2
6	rs9391848	3.382e-20	6.511e-11	AL671883.2
6	rs9266094	1.789e-15	8.522e-10	AL671883.2
6	rs1056429	6.979e-14	1.164e-06	AL671883.2
6	rs9266095	2.735e-13	1.088e-10	AL671883.2
6	rs2442719	2.009e-12	4.428e-08	AL671883.2
6	rs9378247	6.804e-11	1.416e-05	AL671883.2
6	rs9391847	3.096e-10	1.419e-08	AL671883.2
6	rs2507993	2.366e-09	1.695e-05	AL671883.2
6	rs9405083	2.447e-09	9.748e-08	AL671883.2
6	rs143128695	2.976e-22	5.013e-11	ATAT1
6	rs117369084	9.324e-09	1.513e-05	ATF6B
6	rs9366785	8.347e-19	5.344e-08	BAG6
6	rs9391859	1.137e-12	7.286e-06	BTNL2
6	rs9405096	1.137e-12	7.286e-06	BTNL2
6	rs9405097	1.18e-12	5.853e-06	BTNL2
6	rs9391860	1.18e-12	6.225e-06	BTNL2
6	rs117182798	1.237e-12	5.853e-06	BTNL2
6	rs117654464	1.434e-12	4.903e-06	BTNL2
6	rs117393793	1.481e-12	4.988e-06	BTNL2
6	rs6457566	1.551e-12	4.903e-06	BTNL2
6	rs17208706	1.551e-12	4.903e-06	BTNL2
6	rs117026188	1.551e-12	4.903e-06	BTNL2
6	rs3763311	1.406e-11	7.964e-06	BTNL2
6	rs9279637	1.501e-10	8.998e-06	BTNL2
6	rs9268499	1.637e-10	1.052e-05	BTNL2
6	rs118097312	1.838e-18	2.171e-07	C2
6	rs9391732	5.478e-15	3.244e-06	C4A
6	rs2233972	4.701e-21	8.37e-09	C6orf15
6	rs2517473	3.184e-13	5.496e-06	C6orf15
6	rs4495304	3.583e-13	8.359e-06	C6orf15
6	rs4947302	3.904e-13	6.128e-06	C6orf15
6	rs4947246	3.904e-13	6.128e-06	C6orf15
6	rs9404978	3.904e-13	6.128e-06	C6orf15
6	rs10947135	3.904e-13	6.128e-06	C6orf15
6	rs78032704	3.904e-13	6.128e-06	C6orf15
6	rs2233983	3.904e-13	6.128e-06	C6orf15
6	rs2233973	3.953e-13	6.533e-06	C6orf15
6	rs9391709	4.157e-13	6.239e-06	C6orf15
6	rs2233984	4.173e-13	5.174e-06	C6orf15
6	rs707913	4.788e-13	1.337e-06	C6orf15
6	rs2233985	8.124e-13	7.684e-06	C6orf15
6	rs3734854	9.56e-13	1.312e-05	C6orf15
6	rs2233970	1.246e-12	4.518e-06	C6orf15
6	rs3095297	2.193e-12	6.052e-07	C6orf15
6	rs1062470	2.193e-12	6.052e-07	C6orf15
6	rs3130980	4.614e-12	1.201e-06	C6orf15
6	rs3130554	2.936e-11	1.543e-06	C6orf15
6	rs3130553	4.836e-11	1.092e-06	C6orf15
6	rs28652698	3.568e-28	2.057e-11	CCHCR1
6	rs28383832	1.703e-20	6.47e-10	CCHCR1
6	rs1265082	1.835e-20	4.211e-10	CCHCR1
6	rs1265113	1.835e-20	4.211e-10	CCHCR1
6	rs1265090	2.125e-20	1.428e-10	CCHCR1
6	rs1265107	2.399e-20	4.296e-10	CCHCR1
6	rs1265110	2.482e-20	4.296e-10	CCHCR1
6	rs1265074	3.181e-15	3.947e-07	CCHCR1
6	rs1265089	3.186e-15	4.687e-07	CCHCR1
6	rs1265068	3.865e-15	4.111e-07	CCHCR1
6	rs1966	4.233e-15	4.864e-07	CCHCR1
6	rs1265093	4.81e-15	5.978e-07	CCHCR1
6	rs130067	4.983e-15	4.66e-07	CCHCR1
6	rs1265100	6.238e-14	2.026e-07	CCHCR1
6	rs3130453	3.575e-12	4.015e-07	CCHCR1
6	rs6905862	8.884e-12	6.136e-07	CCHCR1
6	rs130066	1.367e-11	1.162e-06	CCHCR1
6	rs1265095	4.048e-10	3.157e-07	CCHCR1
6	rs3819683	1.39e-26	4.828e-09	CDSN
6	rs3131002	2.258e-15	5.43e-07	CDSN
6	rs1265045	1.016e-12	1.483e-06	CDSN
6	rs2239521	1.113e-12	6.364e-07	CDSN
6	rs2239522	1.113e-12	6.364e-07	CDSN
6	rs3131001	1.227e-12	6.297e-07	CDSN
6	rs3834327	1.251e-12	6.468e-07	CDSN
6	rs3130995	1.251e-12	6.468e-07	CDSN
6	rs3095313	1.251e-12	6.468e-07	CDSN
6	rs3094207	1.251e-12	6.468e-07	CDSN
6	rs3130996	1.518e-12	6.292e-07	CDSN
6	rs3132544	1.872e-12	6.476e-07	CDSN
6	rs3094213	2.193e-12	6.052e-07	CDSN
6	rs3130990	2.193e-12	6.052e-07	CDSN
6	rs3130991	2.193e-12	6.052e-07	CDSN
6	rs2302399	2.193e-12	6.052e-07	CDSN
6	rs3091255	2.219e-12	6.052e-07	CDSN
6	rs3094203	4.601e-12	7.922e-06	CDSN
6	rs3095302	5.176e-12	8.195e-06	CDSN
6	rs3094200	5.251e-12	7.344e-06	CDSN
6	rs3095316	5.391e-12	1.358e-06	CDSN
6	rs3094205	6.953e-12	1.571e-06	CDSN
6	rs3095307	7.379e-12	6.892e-06	CDSN
6	rs3094206	1.831e-10	7.052e-06	CDSN
6	rs3130999	2.262e-10	3.544e-06	CDSN
6	rs3131000	2.262e-10	3.544e-06	CDSN
6	rs3095312	2.639e-10	3.469e-06	CDSN
6	rs3130997	2.639e-10	3.469e-06	CDSN
6	rs3132543	3.216e-10	3.55e-06	CDSN
14	rs228127	9.84e-15	3.161e-06	CEP128
14	rs7154132	1.048e-14	6.051e-06	CEP128
14	rs35176982	1.399e-14	4.794e-06	CEP128
14	rs1025253	1.463e-14	4.247e-06	CEP128
14	rs8022411	1.463e-14	4.247e-06	CEP128
14	rs7153979	1.497e-14	5.146e-06	CEP128
14	rs4903948	1.498e-14	4.042e-06	CEP128
14	rs2217176	1.511e-14	2.633e-06	CEP128
14	rs2556601	1.68e-14	3.392e-06	CEP128
14	rs8021137	1.758e-14	4.104e-06	CEP128
14	rs759916	1.912e-14	4.592e-06	CEP128
14	rs2371457	1.919e-14	5.887e-06	CEP128
14	rs172920	1.955e-14	2.432e-06	CEP128
14	rs11385061	2.075e-14	4.641e-06	CEP128
14	rs8005883	2.242e-14	4.322e-06	CEP128
14	rs228121	2.624e-14	5.555e-06	CEP128
14	rs2556605	2.691e-14	1.042e-06	CEP128
14	rs7154373	3.598e-14	3.618e-06	CEP128
14	rs7150858	4.088e-14	7.552e-06	CEP128
14	rs228120	4.959e-14	5.817e-06	CEP128
14	rs2217174	7.241e-14	4.095e-06	CEP128
14	rs61979449	1.074e-13	7.557e-06	CEP128
14	rs228118	1.103e-13	1.017e-06	CEP128
14	rs17613911	1.12e-13	5.341e-06	CEP128
14	rs10546120	1.12e-13	5.341e-06	CEP128
14	rs12880014	1.138e-13	5.409e-06	CEP128
14	rs228111	1.143e-13	6.434e-06	CEP128
14	rs35540104	1.207e-13	8.031e-07	CEP128
14	rs728444	1.208e-13	3.028e-06	CEP128
14	rs8003784	1.221e-13	5.837e-06	CEP128
14	rs12432357	1.221e-13	5.837e-06	CEP128
14	rs8006507	1.237e-13	5.87e-06	CEP128
14	rs17542615	1.346e-13	5.9e-06	CEP128
14	rs1016507	1.355e-13	8.221e-07	CEP128
14	rs7143407	1.383e-13	4.991e-06	CEP128
14	rs1458993	1.463e-13	7.287e-06	CEP128
14	rs7141130	1.47e-13	6.649e-06	CEP128
14	rs11623023	1.491e-13	6.816e-06	CEP128
14	rs12431821	1.531e-13	6.968e-06	CEP128
14	rs61979451	1.531e-13	6.968e-06	CEP128
14	rs61979448	1.55e-13	6.968e-06	CEP128
14	rs12886388	1.55e-13	6.968e-06	CEP128
14	rs2371416	1.55e-13	6.968e-06	CEP128
14	rs61979452	1.55e-13	6.968e-06	CEP128
14	rs7148618	1.563e-13	6.601e-06	CEP128
14	rs12888082	1.801e-13	9.867e-06	CEP128
14	rs12896065	2.985e-13	4.896e-06	CEP128
14	rs1992973	3.143e-13	4.898e-06	CEP128
14	rs2596118	3.143e-13	4.898e-06	CEP128
14	rs4523859	4.541e-13	5.005e-06	CEP128
14	rs17614081	4.877e-13	5.277e-06	CEP128
14	rs7141434	6.011e-13	1.625e-05	CEP128
14	rs12891585	1.134e-12	3.903e-06	CEP128
6	rs151115972	8.989e-18	3.63e-07	CLIC1
6	rs3128927	1.586e-09	8.822e-07	COL11A2P1
6	rs3128930	9.601e-09	2.753e-06	COL11A2P1
6	rs3130213	1.473e-08	8.733e-06	COL11A2P1
2	rs231779	1.831e-14	8.529e-06	CTLA4
2	rs1427680	2.072e-14	8.15e-06	CTLA4
2	rs736611	2.186e-14	9.962e-06	CTLA4
2	rs11571315	2.188e-14	9.432e-06	CTLA4
2	rs231723	3.236e-14	9.247e-06	CTLA4
2	rs3087243	8.749e-13	6.086e-07	CTLA4
2	rs11571316	1.148e-12	5.653e-07	CTLA4
2	rs11571302	6.59e-09	1.503e-05	CTLA4
2	rs7565213	8.52e-09	1.448e-05	CTLA4
6	rs28362611	1.328e-18	6.555e-08	DDR1
6	rs371013749	3.52e-18	2.478e-08	DDR1
6	rs9404935	2.086e-16	3.593e-07	DDR1
6	rs9368645	2.388e-16	3.779e-07	DDR1
6	rs9366762	2.767e-16	4.654e-07	DDR1
6	rs9378150	3.929e-16	3.466e-07	DDR1
6	rs151195028	5.74e-22	8.826e-12	DHX16
6	rs9380182	7.951e-24	1.158e-12	FLOT1
6	rs150971595	1.377e-17	5.386e-08	GABBR1
6	rs995185	8.838e-09	1.662e-05	GABBR1
CHR	SNP	UNADJ	UNADJ	geneID
6	rs9391895	1.115e-15	1.363e-06	GPR53P
6	rs3130667	8.584e-16	7.477e-07	HCG20
6	rs3132602	8.584e-16	7.477e-07	HCG20
6	rs3131039	8.584e-16	7.477e-07	HCG20
6	rs7740279	9.009e-16	8.836e-07	HCG20
6	rs3129979	9.12e-16	9.61e-07	HCG20
6	rs2394402	1.114e-15	5.888e-07	HCG20
6	rs9368648	1.27e-18	1.413e-07	HCG21
6	rs9391637	1.721e-18	8.078e-08	HCG21
6	rs9368647	3.079e-18	1.266e-07	HCG21
6	rs71732848	4.129e-18	4.328e-07	HCG21
6	rs9262630	4.384e-18	5.508e-07	HCG22
6	rs9262651	5.624e-18	8.974e-07	HCG22
6	rs9262636	7.515e-18	4.832e-07	HCG22
6	rs9262638	7.515e-18	4.832e-07	HCG22
6	rs9262639	7.515e-18	4.832e-07	HCG22
6	rs9262648	7.515e-18	4.832e-07	HCG22
6	rs7356893	7.645e-18	4.892e-07	HCG22
6	rs9262654	7.673e-18	4.862e-07	HCG22
6	rs9295945	7.697e-18	9.057e-07	HCG22
6	rs3764808	7.799e-18	5.013e-07	HCG22
6	rs9281117	8.023e-18	1.605e-06	HCG22
6	rs2394427	8.049e-18	1.044e-06	HCG22
6	rs2394423	8.275e-18	5.029e-07	HCG22
6	rs9394032	8.524e-18	9.287e-07	HCG22
6	rs9380211	8.524e-18	9.287e-07	HCG22
6	rs9295946	8.524e-18	9.287e-07	HCG22
6	rs9295947	8.524e-18	9.287e-07	HCG22
6	rs9295948	8.524e-18	9.287e-07	HCG22
6	rs2394426	8.524e-18	9.287e-07	HCG22
6	rs2894048	8.524e-18	9.287e-07	HCG22
6	rs2394425	8.524e-18	9.287e-07	HCG22
6	rs9357106	8.524e-18	9.287e-07	HCG22
6	rs3888579	8.524e-18	9.287e-07	HCG22
6	rs9262642	1.075e-17	4.47e-07	HCG22
6	rs9262618	1.119e-17	4.874e-07	HCG22
6	rs9262620	1.119e-17	4.874e-07	HCG22
6	rs9262633	1.119e-17	4.874e-07	HCG22
6	rs9262635	1.119e-17	4.874e-07	HCG22
6	rs9262637	1.119e-17	4.874e-07	HCG22
6	rs9262640	1.119e-17	4.874e-07	HCG22
6	rs9262641	1.119e-17	4.874e-07	HCG22
6	rs7741049	1.119e-17	4.874e-07	HCG22
6	rs7741474	1.119e-17	4.874e-07	HCG22
6	rs9262646	1.119e-17	4.874e-07	HCG22
6	rs9262647	1.119e-17	4.874e-07	HCG22
6	rs9278856	1.119e-17	4.874e-07	HCG22
6	rs9262650	1.119e-17	4.874e-07	HCG22
6	rs9262622	1.136e-17	4.359e-07	HCG22
6	rs9262616	1.812e-17	4.832e-07	HCG22
6	rs3906263	2.214e-17	8.658e-07	HCG22
6	rs9262634	2.895e-17	1.163e-06	HCG22
6	rs7745521	2.895e-17	1.163e-06	HCG22
6	rs9281119	2.553e-15	4.192e-06	HCG22
6	rs3132506	1.09e-22	2.874e-10	HCG27
6	rs12194291	1.682e-13	1.921e-07	HCG4P8
6	rs1628628	3.99e-11	3.249e-09	HCG4P8
6	rs1611627	7.292e-11	1.122e-09	HCG4P8
6	rs9260809	3.318e-09	5.857e-09	HCG9
6	rs3823363	1.232e-08	5.422e-11	HCG9
6	rs2394252	2.187e-08	7.601e-11	HCG9
6	rs2394250	3.653e-08	7.38e-10	HCG9
6	rs117116160	7.726e-33	1.227e-12	HCP5
6	rs117884751	2.558e-32	1.762e-12	HCP5
6	rs3763287	5.249e-25	1.413e-11	HCP5
6	rs114202986	4.604e-24	3.452e-10	HCP5
6	rs3763288	5.038e-24	3.875e-10	HCP5
6	rs2596466	5.155e-23	3.019e-11	HCP5
6	rs2516471	1.107e-22	2.606e-11	HCP5
6	rs2263323	1.228e-22	3.435e-11	HCP5
6	rs9380254	1.815e-22	3.255e-11	HCP5
6	rs9357133	2.101e-22	2.707e-11	HCP5
6	rs2848709	5.637e-22	3.513e-09	HCP5
6	rs2524279	7.649e-22	1.257e-10	HCP5
6	rs2524280	1.18e-19	3.523e-09	HCP5
6	rs2266161	2.986e-19	1.249e-07	HCP5
6	rs9366783	4.148e-17	1.976e-08	HCP5
6	rs12174396	4.482e-17	1.976e-08	HCP5
6	rs9404989	1.298e-10	1.846e-06	HCP5
6	rs4713467	1.705e-10	1.775e-06	HCP5
6	rs3828888	1.979e-10	1.678e-06	HCP5
6	rs12524498	3.286e-09	2.066e-06	HCP5
6	rs1655901	1.557e-09	5.483e-10	HLA-A
6	rs9260313	7.133e-09	1.391e-10	HLA-A
6	rs9260388	2.137e-08	6.609e-11	HLA-A
6	rs141618471	1.009e-31	2.308e-13	HLA-B
6	rs9378228	1.704e-31	4.476e-12	HLA-B
6	rs12524692	7.741e-29	1.761e-12	HLA-B
6	rs72860306	5.838e-28	2.162e-11	HLA-B
6	rs9357121	9.242e-22	4.977e-12	HLA-B
6	rs9366775	1.429e-21	5.838e-12	HLA-B
6	rs4298345	1.638e-21	6.464e-12	HLA-B
6	rs56356836	2.388e-21	4.535e-12	HLA-B
6	rs9405016	2.388e-21	4.535e-12	HLA-B
6	rs12529015	2.388e-21	4.535e-12	HLA-B
6	rs9368669	2.388e-21	4.535e-12	HLA-B
6	rs9391714	2.901e-21	4.408e-12	HLA-B
6	rs9380234	5.626e-21	3.448e-12	HLA-B
6	rs72860304	2.02e-19	6.021e-06	HLA-B
6	rs9368667	2.222e-19	5.937e-06	HLA-B
6	rs67156613	2.222e-19	5.937e-06	HLA-B
6	rs9391846	2.473e-19	1.631e-10	HLA-B
6	rs10807087	3.26e-19	1.076e-05	HLA-B
6	rs9391774	3.289e-19	4.953e-11	HLA-B
6	rs9368672	3.708e-19	1.754e-11	HLA-B
6	rs6918048	3.708e-19	1.846e-11	HLA-B
6	rs9348864	3.767e-19	8.512e-11	HLA-B
6	rs148136265	3.767e-19	8.512e-11	HLA-B
6	rs56229131	4.193e-19	4.855e-06	HLA-B
6	rs55813549	4.343e-19	5.032e-11	HLA-B
6	rs114985235	4.808e-19	2.189e-11	HLA-B
6	rs116589426	4.808e-19	2.189e-11	HLA-B
6	rs114151681	4.808e-19	2.189e-11	HLA-B
6	rs9380241	4.808e-19	2.189e-11	HLA-B
6	rs56244255	4.808e-19	2.243e-11	HLA-B
6	rs56334149	4.808e-19	2.243e-11	HLA-B
6	rs12526259	4.808e-19	2.243e-11	HLA-B
6	rs149308954	4.808e-19	2.243e-11	HLA-B
6	rs9394053	4.986e-19	8.45e-11	HLA-B
6	rs7761855	5e-19	2.321e-11	HLA-B
6	rs9405028	5.864e-19	3.952e-11	HLA-B
6	rs67494727	5.864e-19	3.952e-11	HLA-B
6	rs9405074	6.567e-19	4.144e-11	HLA-B
6	rs56262493	6.576e-19	4.438e-11	HLA-B
6	rs56353634	6.584e-19	4.749e-11	HLA-B
6	rs6906714	6.604e-19	4.501e-11	HLA-B
6	rs9295984	6.863e-19	4.438e-11	HLA-B
6	rs6919086	7.273e-19	7.331e-10	HLA-B
6	rs200983150	7.426e-19	2.951e-09	HLA-B
6	rs200291258	7.426e-19	2.951e-09	HLA-B
6	rs9394054	7.436e-19	1.498e-11	HLA-B
6	rs200335735	7.585e-19	4.908e-11	HLA-B
6	rs12174571	7.768e-19	4.908e-11	HLA-B
6	rs9391719	7.768e-19	4.908e-11	HLA-B
6	rs72502563	7.768e-19	5.146e-11	HLA-B
6	rs60091015	7.768e-19	5.146e-11	HLA-B
6	rs4492231	7.768e-19	5.146e-11	HLA-B
6	rs72502564	7.768e-19	5.146e-11	HLA-B
6	rs115034963	7.768e-19	5.146e-11	HLA-B
6	rs115190576	7.768e-19	5.146e-11	HLA-B
6	rs72502565	7.768e-19	5.146e-11	HLA-B
6	rs9295982	7.819e-19	5.146e-11	HLA-B
6	rs9391641	7.891e-19	5.146e-11	HLA-B
6	rs9295980	7.891e-19	5.146e-11	HLA-B
6	rs9283890	7.891e-19	5.146e-11	HLA-B
6	rs115813673	7.902e-19	4.908e-11	HLA-B
6	rs55674503	8.068e-19	4.645e-11	HLA-B
6	rs56280537	8.203e-19	4.608e-11	HLA-B
6	rs4311503	8.304e-19	5.146e-11	HLA-B
6	rs6919058	8.49e-19	5.146e-11	HLA-B
6	rs6942380	8.49e-19	5.146e-11	HLA-B
6	rs9378155	8.49e-19	5.146e-11	HLA-B
6	rs9378156	8.49e-19	5.146e-11	HLA-B
6	rs4527750	8.687e-19	4.854e-11	HLA-B
6	rs9391841	8.687e-19	4.854e-11	HLA-B
6	rs9405025	1.083e-18	2.011e-09	HLA-B
6	rs116685461	1.12e-18	6.018e-11	HLA-B
6	rs9405031	1.12e-18	6.018e-11	HLA-B
6	rs9391843	1.12e-18	6.018e-11	HLA-B
6	rs114317621	1.232e-18	7.388e-11	HLA-B
6	rs150527794	1.232e-18	7.388e-11	HLA-B
6	rs72502566	1.273e-18	5.306e-11	HLA-B
6	rs12173768	1.273e-18	5.306e-11	HLA-B
6	rs138928713	1.4e-18	6.177e-06	HLA-B
6	rs9348858	1.409e-18	5.31e-06	HLA-B
6	rs34540685	1.602e-18	9.044e-11	HLA-B
6	rs33998388	1.602e-18	9.044e-11	HLA-B
6	rs9380231	1.71e-18	9.18e-06	HLA-B
6	rs9368668	1.724e-18	9.18e-06	HLA-B
6	rs9378199	1.728e-18	2.218e-09	HLA-B
6	rs9368683	1.885e-18	3.116e-11	HLA-B
6	rs9394047	2.06e-18	1.73e-05	HLA-B
6	rs28771426	2.844e-18	5.013e-11	HLA-B
6	rs9378157	2.896e-18	6.543e-11	HLA-B
6	rs9391834	4.367e-18	2.121e-09	HLA-B
6	rs9405076	4.367e-18	2.121e-09	HLA-B
6	rs2524075	4.443e-18	2.583e-09	HLA-B
6	rs12234123	4.817e-18	6.773e-10	HLA-B
6	rs3130696	4.872e-18	2.64e-09	HLA-B
6	rs12525626	5.459e-18	2.013e-09	HLA-B
6	rs9380235	6.061e-18	1.115e-09	HLA-B
6	rs9405073	6.416e-18	2.532e-09	HLA-B
6	rs9394050	6.738e-18	1.087e-09	HLA-B
6	rs28367586	6.765e-18	1.026e-09	HLA-B
6	rs9380232	7.208e-18	1.122e-09	HLA-B
6	rs9295968	7.208e-18	1.122e-09	HLA-B
6	rs9394049	7.427e-18	6.497e-10	HLA-B
6	rs28563838	7.631e-18	1.451e-09	HLA-B
6	rs6919310	8.717e-18	7.843e-10	HLA-B
6	rs9391715	8.717e-18	7.843e-10	HLA-B
6	rs9394048	8.947e-18	1.292e-09	HLA-B
6	rs6912893	5.233e-17	5.519e-10	HLA-B
6	rs4637682	1.854e-16	2.563e-08	HLA-B
6	rs12173764	1.873e-16	2.347e-08	HLA-B
6	rs4397267	3.026e-16	1.867e-08	HLA-B
6	rs4361609	1.931e-15	2.503e-07	HLA-B
6	rs2524076	3.505e-15	2.53e-06	HLA-B
6	rs3094680	3.568e-15	2.53e-06	HLA-B
6	rs16899147	1.178e-14	1.515e-08	HLA-B
6	rs3873377	1.761e-14	1.456e-08	HLA-B
6	rs9366776	1.817e-14	1.434e-08	HLA-B
6	rs2523599	1.872e-14	3.029e-06	HLA-B
6	rs6921855	2.273e-14	1.434e-08	HLA-B
6	rs6899660	2.273e-14	1.434e-08	HLA-B
6	rs9348860	2.273e-14	1.434e-08	HLA-B
6	rs9348861	2.273e-14	1.434e-08	HLA-B
6	rs9368670	2.273e-14	1.434e-08	HLA-B
6	rs76141334	2.273e-14	1.434e-08	HLA-B
6	rs72861464	2.273e-14	1.434e-08	HLA-B
6	rs72861465	2.273e-14	1.434e-08	HLA-B
6	rs17198727	2.273e-14	1.434e-08	HLA-B
6	rs10947169	2.273e-14	1.434e-08	HLA-B
6	rs6939681	2.273e-14	1.434e-08	HLA-B
6	rs9357122	2.273e-14	1.434e-08	HLA-B
6	rs9394051	2.273e-14	1.434e-08	HLA-B
6	rs9394052	2.273e-14	1.434e-08	HLA-B
6	rs9295969	2.273e-14	1.434e-08	HLA-B
6	rs3873381	2.273e-14	1.434e-08	HLA-B
6	rs9380236	2.273e-14	1.449e-08	HLA-B
6	rs6916525	2.348e-14	1.464e-08	HLA-B
6	rs9348862	2.61e-14	1.417e-08	HLA-B
6	rs9368671	2.726e-14	1.501e-08	HLA-B
6	rs3873382	2.766e-14	1.65e-08	HLA-B
6	rs9357123	3.206e-14	5.068e-09	HLA-B
6	rs9348863	3.218e-14	1.657e-08	HLA-B
6	rs72861484	3.3e-14	2.067e-08	HLA-B
6	rs2853923	3.391e-14	4.272e-09	HLA-B
6	rs9366777	6.814e-14	5.171e-08	HLA-B
6	rs9380238	7.695e-14	7.736e-11	HLA-B
6	rs28481932	2.304e-13	4.335e-06	HLA-B
6	rs9391723	4.474e-13	1.322e-09	HLA-B
6	rs28380921	4.474e-13	1.322e-09	HLA-B
6	rs28380922	4.752e-13	1.122e-09	HLA-B
6	rs28771422	4.889e-13	9.861e-10	HLA-B
6	rs28771421	5.074e-13	3.522e-10	HLA-B
6	rs9265940	5.958e-13	1.92e-09	HLA-B
6	rs9391720	6.933e-13	2.083e-10	HLA-B
6	rs2523623	1.039e-12	3.105e-10	HLA-B
6	rs28771425	1.084e-12	3.338e-10	HLA-B
6	rs5021845	1.09e-12	3.105e-10	HLA-B
6	rs4260781	1.323e-12	1.634e-10	HLA-B
6	rs1634769	1.557e-12	4.662e-10	HLA-B
6	rs4713457	1.65e-12	3.617e-07	HLA-B
6	rs6906721	2.257e-12	1.139e-05	HLA-B
6	rs4713456	3.332e-12	7.271e-07	HLA-B
6	rs9266059	1.95e-11	2.583e-06	HLA-B
6	rs9265961	3.393e-11	5.083e-09	HLA-B
6	rs2524058	7.789e-11	2.283e-06	HLA-B
6	rs9265984	3.813e-10	3.305e-06	HLA-B
6	rs9265986	3.813e-10	3.305e-06	HLA-B
6	rs9265987	3.813e-10	3.305e-06	HLA-B
6	rs2853943	3.896e-10	9.857e-06	HLA-B
6	rs9265978	4.788e-10	2.872e-06	HLA-B
6	rs17192554	5.846e-10	1.477e-06	HLA-B
6	rs17198923	5.898e-10	1.484e-06	HLA-B
6	rs9265951	8.557e-10	1.961e-07	HLA-B
6	rs9265953	8.813e-10	1.923e-07	HLA-B
6	rs9265977	1.2e-09	2.583e-06	HLA-B
6	rs9391844	1.507e-09	1.028e-05	HLA-B
6	rs9391845	1.507e-09	1.028e-05	HLA-B
6	rs2523624	1.91e-09	2.594e-09	HLA-B
6	rs2596521	2.161e-09	3.018e-09	HLA-B
6	rs3132482	1.182e-08	1.431e-05	HLA-B
6	rs9265912	2.221e-08	1.102e-06	HLA-B
6	rs1634774	2.354e-08	2.33e-08	HLA-B
6	rs12526246	4.426e-08	5.973e-07	HLA-B
6	rs3841160	1.177e-17	1.036e-05	HLA-DPA1
6	rs12662112	1.177e-17	1.036e-05	HLA-DPA1
6	rs28449420	4.365e-16	7.385e-06	HLA-DPA1
6	rs4501465	1.017e-15	6.745e-07	HLA-DPA1
6	rs9296073	1.017e-15	6.745e-07	HLA-DPA1
6	rs9296074	1.017e-15	6.745e-07	HLA-DPA1
6	rs2308927	1.043e-15	1.188e-06	HLA-DPA1
6	rs1126544	1.043e-15	1.188e-06	HLA-DPA1
6	rs9380340	1.302e-15	8.266e-07	HLA-DPA1
6	rs78103064	1.424e-15	6.758e-06	HLA-DPA1
6	rs9394130	2.557e-15	9.978e-07	HLA-DPA1
6	rs142544441	4.538e-15	1.196e-05	HLA-DPA1
6	rs60038796	4.908e-15	7.155e-06	HLA-DPA1
6	rs1126534	4.972e-15	6.389e-06	HLA-DPA1
6	rs1126533	4.972e-15	6.389e-06	HLA-DPA1
6	rs79541122	5.908e-15	6.742e-06	HLA-DPA1
6	rs2856816	9.177e-15	1.704e-05	HLA-DPA1
6	rs1126513	2.798e-12	6.457e-07	HLA-DPA1
6	rs1126511	3.135e-12	6.252e-07	HLA-DPA1
6	rs1126504	4.611e-12	5.047e-07	HLA-DPA1
6	rs1126509	4.611e-12	5.047e-07	HLA-DPA1
6	rs1126506	5.034e-12	4.972e-07	HLA-DPA1
6	rs2856821	1.731e-10	6.189e-07	HLA-DPA1
6	rs1431402	2.469e-10	7.108e-07	HLA-DPA1
6	rs2021408	3.642e-10	7.366e-07	HLA-DPA1
6	rs1042153	1.734e-09	2.806e-06	HLA-DPA1
6	rs9277381	4.265e-08	7.93e-06	HLA-DPA1
6	rs9277379	4.868e-08	6.573e-06	HLA-DPA1
6	rs3130201	6.812e-12	3.212e-06	HLA-DPA2
6	rs9277552	1.435e-09	5.065e-07	HLA-DPA2
6	rs3128965	4.794e-08	7.716e-06	HLA-DPA2
6	rs3128966	4.839e-08	6.573e-06	HLA-DPA2
6	rs35656734	1.333e-17	1.407e-09	HLA-DQA1
6	rs17205191	1.461e-17	5.2e-10	HLA-DQA1
6	rs35585151	1.476e-17	8.826e-10	HLA-DQA1
6	rs115566240	1.682e-17	3.041e-10	HLA-DQA1
6	rs181534481	2.135e-17	3.042e-08	HLA-DQA1
6	rs115700690	2.722e-16	7.949e-06	HLA-DQA1
6	rs139558884	3.24e-16	3.55e-06	HLA-DQA1
6	rs115908946	3.324e-16	6.987e-06	HLA-DQA1
6	rs115016190	3.496e-16	6.696e-06	HLA-DQA1
6	rs146217951	3.496e-16	6.696e-06	HLA-DQA1
6	rs77639852	3.496e-16	6.696e-06	HLA-DQA1
6	rs78692977	3.496e-16	6.696e-06	HLA-DQA1
6	rs76822178	3.496e-16	6.696e-06	HLA-DQA1
6	rs79473311	3.496e-16	6.696e-06	HLA-DQA1
6	rs79573551	3.496e-16	6.696e-06	HLA-DQA1
6	rs114088880	3.537e-16	7.065e-06	HLA-DQA1
6	rs367728179	3.623e-16	7.565e-06	HLA-DQA1
6	rs9272140	3.623e-16	7.565e-06	HLA-DQA1
6	rs115223053	3.629e-16	7.565e-06	HLA-DQA1
6	rs115711192	3.637e-16	7.154e-06	HLA-DQA1
6	rs150015489	3.637e-16	7.154e-06	HLA-DQA1
6	rs114027542	3.637e-16	7.154e-06	HLA-DQA1
6	rs373813924	3.637e-16	7.154e-06	HLA-DQA1
6	rs146353211	3.637e-16	7.154e-06	HLA-DQA1
6	rs117055012	3.637e-16	7.154e-06	HLA-DQA1
6	rs114352945	3.637e-16	7.154e-06	HLA-DQA1
6	rs114762033	3.637e-16	7.154e-06	HLA-DQA1
6	rs563316064	3.637e-16	7.154e-06	HLA-DQA1
6	rs575430623	3.637e-16	7.154e-06	HLA-DQA1
6	rs371537406	3.637e-16	7.154e-06	HLA-DQA1
6	rs114799674	3.637e-16	7.154e-06	HLA-DQA1
6	rs115573799	3.637e-16	7.154e-06	HLA-DQA1
6	rs115503527	3.637e-16	7.154e-06	HLA-DQA1
6	rs28534011	3.637e-16	7.154e-06	HLA-DQA1
6	rs565181451	3.637e-16	7.154e-06	HLA-DQA1
6	rs545248976	3.637e-16	7.154e-06	HLA-DQA1
6	rs28417660	3.637e-16	7.154e-06	HLA-DQA1
6	rs372332783	3.637e-16	7.154e-06	HLA-DQA1
6	rs199950886	3.637e-16	7.154e-06	HLA-DQA1
6	rs114895321	3.637e-16	7.154e-06	HLA-DQA1
6	rs115717621	3.637e-16	7.154e-06	HLA-DQA1
6	rs114025574	3.637e-16	7.154e-06	HLA-DQA1
6	rs114774960	3.637e-16	7.154e-06	HLA-DQA1
6	rs115493697	3.637e-16	7.154e-06	HLA-DQA1
6	rs115139056	3.637e-16	7.154e-06	HLA-DQA1
6	rs559861992	3.637e-16	7.154e-06	HLA-DQA1
6	rs116236894	3.637e-16	7.154e-06	HLA-DQA1
6	rs115296161	3.637e-16	7.154e-06	HLA-DQA1
6	rs182013486	3.637e-16	7.154e-06	HLA-DQA1
6	rs184922584	3.637e-16	7.154e-06	HLA-DQA1
6	rs181184133	3.637e-16	7.154e-06	HLA-DQA1
6	rs549131306	3.637e-16	7.154e-06	HLA-DQA1
6	rs139727756	3.637e-16	7.154e-06	HLA-DQA1
6	rs114307619	3.672e-16	7.154e-06	HLA-DQA1
6	rs115609519	3.672e-16	7.154e-06	HLA-DQA1
6	rs114307375	3.672e-16	7.154e-06	HLA-DQA1
6	rs143117432	3.672e-16	7.154e-06	HLA-DQA1
6	rs147493459	3.672e-16	7.154e-06	HLA-DQA1
6	rs116573360	3.672e-16	7.154e-06	HLA-DQA1
6	rs576628433	3.672e-16	7.154e-06	HLA-DQA1
6	rs138816958	3.672e-16	7.154e-06	HLA-DQA1
6	rs138238823	3.672e-16	7.154e-06	HLA-DQA1
6	rs146406015	3.672e-16	7.154e-06	HLA-DQA1
6	rs139692935	3.672e-16	7.154e-06	HLA-DQA1
6	rs879665507	3.672e-16	7.154e-06	HLA-DQA1
6	rs115315696	3.672e-16	7.154e-06	HLA-DQA1
6	rs550642974	3.672e-16	7.154e-06	HLA-DQA1
6	rs115624624	3.672e-16	7.154e-06	HLA-DQA1
6	rs116202168	3.672e-16	7.154e-06	HLA-DQA1
6	rs114866528	3.672e-16	7.154e-06	HLA-DQA1
6	rs116633385	3.672e-16	7.154e-06	HLA-DQA1
6	rs116109088	3.672e-16	7.154e-06	HLA-DQA1
6	rs115214276	3.672e-16	7.154e-06	HLA-DQA1
6	rs116728358	3.672e-16	7.154e-06	HLA-DQA1
6	rs114310549	3.672e-16	7.154e-06	HLA-DQA1
6	rs115231411	3.672e-16	7.154e-06	HLA-DQA1
6	rs116485389	3.672e-16	7.154e-06	HLA-DQA1
6	rs536081339	3.672e-16	7.154e-06	HLA-DQA1
6	rs368699425	3.753e-16	8.768e-06	HLA-DQA1
6	rs563648725	3.824e-16	5.486e-06	HLA-DQA1
6	rs28720766	4.078e-16	8.404e-06	HLA-DQA1
6	rs116517496	4.318e-16	7.328e-06	HLA-DQA1
6	rs114968544	4.539e-16	7.572e-06	HLA-DQA1
6	rs74606007	4.914e-16	6.579e-06	HLA-DQA1
6	rs114308959	5.505e-16	7.057e-06	HLA-DQA1
6	rs116494205	6.93e-16	7.498e-06	HLA-DQA1
6	rs752245759	8.574e-16	1.507e-05	HLA-DQA1
6	rs28635391	8.668e-16	8.985e-06	HLA-DQA1
6	rs115738641	1.031e-15	3.385e-06	HLA-DQA1
6	rs555111717	3.319e-15	6.961e-06	HLA-DQA1
6	rs9272226	3.878e-12	1.317e-05	HLA-DQA1
6	rs2002777	4.341e-12	1.218e-05	HLA-DQA1
6	rs1435796677	1.897e-10	7.949e-06	HLA-DQA1
6	rs1299721066	1.897e-10	7.949e-06	HLA-DQA1
6	rs139299944	2.909e-10	9.576e-08	HLA-DQA1
6	rs17205373	1.252e-18	8.08e-06	HLA-DQB1
6	rs375217182	1.825e-16	1.951e-08	HLA-DQB1
6	rs6900039	4.86e-16	7.336e-06	HLA-DQB1
6	rs7743506	7.519e-16	7.208e-06	HLA-DQB1
6	rs9469112	3.301e-26	1.714e-10	HLA-DRA
6	rs16822660	1.358e-22	1.942e-08	HLA-DRA
6	rs9469113	2.495e-21	1.551e-07	HLA-DRA
6	rs16822599	1.411e-15	3.625e-06	HLA-DRA
6	rs3129870	3.442e-13	1.541e-05	HLA-DRA
6	rs9268644	5.962e-13	1.535e-05	HLA-DRA
6	rs11751673	1.923e-19	2.986e-11	HLA-DRB1
6	rs11756331	1.923e-19	2.986e-11	HLA-DRB1
6	rs11752229	1.923e-19	2.986e-11	HLA-DRB1
6	rs11756836	1.923e-19	2.986e-11	HLA-DRB1
6	rs7749350	1.923e-19	2.986e-11	HLA-DRB1
6	rs7753335	1.152e-14	1.632e-07	HLA-DRB1
6	rs7770920	3.508e-24	1.697e-10	HLA-DRB9
6	rs6457596	3.508e-24	1.697e-10	HLA-DRB9
6	rs111573974	3.508e-24	1.697e-10	HLA-DRB9
6	rs6924760	3.523e-24	1.714e-10	HLA-DRB9
6	rs9286789	3.523e-24	1.714e-10	HLA-DRB9
6	rs17203039	3.523e-24	1.714e-10	HLA-DRB9
6	rs11759730	3.523e-24	1.714e-10	HLA-DRB9
6	rs9461755	3.523e-24	1.714e-10	HLA-DRB9
6	rs9461756	3.523e-24	1.714e-10	HLA-DRB9
6	rs2071805	3.523e-24	1.714e-10	HLA-DRB9
6	rs61550563	3.523e-24	1.714e-10	HLA-DRB9
6	rs17209754	3.523e-24	1.714e-10	HLA-DRB9
6	rs17209768	3.523e-24	1.714e-10	HLA-DRB9
6	rs17203430	3.523e-24	1.714e-10	HLA-DRB9
6	rs17203444	3.523e-24	1.714e-10	HLA-DRB9
6	rs17209803	3.523e-24	1.714e-10	HLA-DRB9
6	rs17203458	3.523e-24	1.714e-10	HLA-DRB9
6	rs148948227	3.559e-24	1.598e-10	HLA-DRB9
6	rs11753780	3.559e-24	1.626e-10	HLA-DRB9
6	rs9469129	3.693e-24	1.691e-10	HLA-DRB9
6	rs9469130	3.693e-24	1.691e-10	HLA-DRB9
6	rs73729294	6.368e-24	2.465e-10	HLA-DRB9
6	rs9469120	6.384e-24	2.717e-10	HLA-DRB9
6	rs76187645	1.904e-22	9.759e-09	HLA-DRB9
6	rs9501639	2.036e-22	1.009e-08	HLA-DRB9
6	rs56083136	2.686e-21	1.711e-07	HLA-DRB9
6	rs9501640	2.686e-21	1.711e-07	HLA-DRB9
6	rs35286068	4.187e-21	2.184e-07	HLA-DRB9
6	rs9469126	1.298e-17	1.898e-08	HLA-DRB9
6	rs373939101	1.302e-17	1.912e-08	HLA-DRB9
6	rs189964538	1.302e-17	1.912e-08	HLA-DRB9
6	rs142774403	1.555e-17	2.335e-08	HLA-DRB9
6	rs59406271	2.067e-17	2.919e-08	HLA-DRB9
6	rs77332307	2.026e-15	6.674e-09	HLA-DRB9
6	rs9269146	1.424e-14	6.656e-07	HLA-DRB9
6	rs7739302	6.208e-14	2.622e-06	HLA-DRB9
6	rs10947290	2.299e-11	2.368e-07	HLA-DRB9
6	rs16897572	7.874e-13	1.963e-07	HLA-E
6	rs1264457	6.928e-12	9.757e-06	HLA-E
6	rs12207974	8.72e-09	2.203e-06	HLA-E
6	rs4711220	9.014e-09	7.588e-06	HLA-E
6	rs2105960	1.224e-08	5.932e-06	HLA-E
6	rs2078675	1.228e-08	2.605e-06	HLA-E
6	rs2523793	1.726e-08	1.346e-08	HLA-G
6	rs2735019	1.827e-08	1.335e-08	HLA-G
6	rs2517890	1.858e-08	1.346e-08	HLA-G
6	rs1611185	5.653e-11	3.65e-09	HLA-P
6	rs12524487	1.091e-23	7.226e-10	HLA-S
6	rs3020583	8.455e-12	1.677e-06	HLA-S
6	rs60478274	3.149e-08	2.246e-09	HLA-W
6	rs2517689	5.003e-08	2.332e-09	HLA-W
6	rs9391634	7.584e-26	1.654e-11	LINC00243
6	rs9348844	8.503e-18	6.756e-08	LINC00243
6	rs6905957	3.942e-10	5.601e-06	LINC00243
6	rs4713385	6.084e-10	5.367e-06	LINC00243
6	rs2269854	6.65e-10	4.664e-06	LINC00243
6	rs34154598	6.662e-10	5.671e-06	LINC00243
6	rs4713389	7.866e-10	5.506e-06	LINC00243
6	rs7751869	7.894e-10	5.41e-06	LINC00243
6	rs4713382	8.275e-10	5.222e-06	LINC00243
6	rs4713383	8.448e-10	5.222e-06	LINC00243
6	rs4587207	8.495e-10	3.921e-06	LINC00243
6	rs13191728	8.816e-10	5.203e-06	LINC00243
6	rs9380198	8.831e-10	4.746e-06	LINC00243
6	rs10947101	9.094e-10	5.276e-06	LINC00243
6	rs4947289	9.178e-10	5.41e-06	LINC00243
6	rs9378148	9.204e-10	6.071e-06	LINC00243
6	rs9378109	9.362e-10	4.445e-06	LINC00243
6	rs4713380	9.573e-10	4.881e-06	LINC00243
6	rs13191291	9.586e-10	4.864e-06	LINC00243
6	rs9368640	9.586e-10	4.864e-06	LINC00243
6	rs9394014	9.586e-10	4.864e-06	LINC00243
6	rs12525494	9.586e-10	4.864e-06	LINC00243
6	rs57403748	9.586e-10	4.864e-06	LINC00243
6	rs9295920	9.586e-10	4.864e-06	LINC00243
6	rs9391692	9.586e-10	4.864e-06	LINC00243
6	rs9404973	9.586e-10	4.864e-06	LINC00243
6	rs9391694	9.586e-10	4.864e-06	LINC00243
6	rs9380193	9.586e-10	4.864e-06	LINC00243
6	rs9380195	9.586e-10	4.864e-06	LINC00243
6	rs12528843	9.586e-10	4.864e-06	LINC00243
6	rs9404975	9.586e-10	4.864e-06	LINC00243
6	rs13213098	9.628e-10	4.656e-06	LINC00243
6	rs13198118	1.013e-09	4.195e-06	LINC00243
6	rs9404974	1.068e-09	4.793e-06	LINC00243
6	rs4947290	1.124e-09	6.108e-06	LINC00243
6	rs9380191	1.167e-09	4.636e-06	LINC00243
6	rs9295918	1.22e-09	4.17e-06	LINC00243
6	rs13213083	1.22e-09	4.17e-06	LINC00243
6	rs13213469	1.22e-09	4.17e-06	LINC00243
6	rs9380190	1.225e-09	4.508e-06	LINC00243
6	rs3888583	1.23e-09	4.637e-06	LINC00243
6	rs10947098	1.232e-09	7.43e-06	LINC00243
6	rs4248149	1.268e-09	5.311e-06	LINC00243
6	rs4711236	1.304e-09	3.783e-06	LINC00243
6	rs4711237	1.304e-09	3.783e-06	LINC00243
6	rs9295924	1.312e-09	5.895e-06	LINC00243
6	rs4713384	1.312e-09	5.895e-06	LINC00243
6	rs10947102	1.312e-09	5.895e-06	LINC00243
6	rs6901761	1.312e-09	5.895e-06	LINC00243
6	rs13201384	1.312e-09	5.895e-06	LINC00243
6	rs7751827	1.312e-09	5.895e-06	LINC00243
6	rs12661685	1.312e-09	5.895e-06	LINC00243
6	rs2394403	1.356e-09	4.147e-06	LINC00243
6	rs9368644	1.388e-09	5.54e-06	LINC00243
6	rs9295917	1.576e-09	3.828e-06	LINC00243
6	rs9380189	1.615e-09	1.853e-06	LINC00243
6	rs6901776	2.363e-09	6.928e-06	LINC00243
6	rs28381567	3.992e-09	7.129e-06	LINC00243
6	rs117589205	2.661e-16	1.803e-07	LINC02570
6	rs9357135	1.466e-25	1.962e-08	LST1
6	rs3828913	1.073e-19	8.515e-07	MICB
6	rs9267352	2.271e-08	5.474e-06	MICB
6	rs6908934	2.613e-08	5.147e-06	MICB
6	rs6910297	2.898e-08	6.214e-06	MICB
6	rs9267429	3.087e-08	4.893e-06	MICB
6	rs9380260	3.664e-08	7.707e-06	MICB
6	rs9267378	4.298e-08	1.32e-05	MICB
6	rs3893463	2.572e-09	5.859e-09	MICD
6	rs1633095	3.857e-11	1.943e-09	MICG
6	rs1633097	6.705e-11	1.123e-09	MICG
6	rs1610705	1.197e-10	4.961e-09	MICG
6	rs1736956	1.197e-10	4.961e-09	MICG
6	rs1077997	1.197e-10	4.961e-09	MICG
6	rs1633105	1.215e-10	4.628e-09	MICG
6	rs1610706	1.255e-10	4.911e-09	MICG
6	rs9380134	1.69e-13	1.098e-06	MOG
6	rs9275500	2.714e-18	1.152e-05	MTCO3P1
6	rs17206287	2.182e-17	4.175e-08	MTCO3P1
6	rs17615141	2.269e-14	3.346e-08	MTCO3P1
6	rs112802378	2.969e-14	2.023e-08	MTCO3P1
6	rs116953562	2.969e-14	2.023e-08	MTCO3P1
6	rs114931041	2.969e-14	2.023e-08	MTCO3P1
6	rs116823632	2.969e-14	2.023e-08	MTCO3P1
6	rs200518968	2.969e-14	2.023e-08	MTCO3P1
6	rs112057165	2.969e-14	2.023e-08	MTCO3P1
6	rs112941700	2.969e-14	2.023e-08	MTCO3P1
6	rs113556552	2.969e-14	2.023e-08	MTCO3P1
6	rs113413656	2.969e-14	2.023e-08	MTCO3P1
6	rs547480736	2.992e-14	2.023e-08	MTCO3P1
6	rs112678772	2.992e-14	2.047e-08	MTCO3P1
6	rs117736824	2.992e-14	2.047e-08	MTCO3P1
6	rs113738873	2.992e-14	2.047e-08	MTCO3P1
6	rs112947282	2.992e-14	2.047e-08	MTCO3P1
6	rs113380489	2.992e-14	2.047e-08	MTCO3P1
6	rs112512026	2.992e-14	2.047e-08	MTCO3P1
6	rs117392376	2.992e-14	2.047e-08	MTCO3P1
6	rs112679091	2.992e-14	2.082e-08	MTCO3P1
6	rs113919826	3.03e-14	2.047e-08	MTCO3P1
6	rs111808493	3.03e-14	2.047e-08	MTCO3P1
6	rs6909425	2.747e-08	1.429e-05	MUC21
6	rs9357105	2.342e-31	4.313e-12	MUC22
6	rs2844670	1.207e-13	2.757e-09	MUC22
6	rs2517552	1.802e-10	1.423e-06	MUC22
6	rs2844665	2.699e-10	1.012e-06	MUC22
6	rs2844669	2.74e-10	1.012e-06	MUC22
6	rs2844672	4.873e-10	1.427e-06	MUC22
6	rs2394430	5.628e-10	3.484e-06	MUC22
6	rs2844681	5.681e-10	2.253e-06	MUC22
6	rs2517553	7.609e-10	1.503e-06	MUC22
6	rs2394429	9.024e-10	2.294e-06	MUC22
6	rs71757905	2.215e-09	8.642e-06	MUC22
6	rs117295261	2.295e-23	3.29e-09	MUCL3
6	rs2286654	1.866e-18	7.041e-08	MUCL3
6	rs4711248	4.362e-18	1.93e-07	MUCL3
6	rs3131921	6.725e-15	1.782e-07	MUCL3
6	rs3217063	1.215e-13	1.741e-05	MUCL3
6	rs9295937	1.907e-18	1.953e-07	NAPGP2
6	rs4711250	1.963e-18	1.536e-07	NAPGP2
6	rs9296012	1.466e-14	1.699e-07	NOTCH4
6	rs6902805	1.727e-14	1.452e-07	NOTCH4
6	rs532385	3.245e-12	3.834e-06	NOTCH4
6	rs387071	2.652e-11	4.808e-08	NOTCH4
6	rs447903	3.457e-11	4.598e-08	NOTCH4
6	rs370055	3.642e-11	5.219e-08	NOTCH4
6	rs499691	3.642e-11	5.219e-08	NOTCH4
6	rs2395105	3.965e-10	1.87e-06	NOTCH4
6	rs9267845	4.302e-10	1.868e-06	NOTCH4
6	rs2395106	4.389e-10	1.969e-06	NOTCH4
6	rs1475961	4.935e-10	1.866e-06	NOTCH4
6	rs3132950	4.935e-10	1.866e-06	NOTCH4
6	rs1475960	4.935e-10	1.866e-06	NOTCH4
6	rs3096691	4.935e-10	1.866e-06	NOTCH4
6	rs9368601	9.983e-13	7.625e-06	OR10C1
6	rs9393959	1.932e-10	2.095e-06	OR11A1
6	rs7349875	1.932e-10	2.095e-06	OR11A1
6	rs7349876	1.932e-10	2.095e-06	OR11A1
6	rs10946990	2.098e-10	2.291e-06	OR11A1
6	rs9295805	2.181e-10	2.09e-06	OR11A1
6	rs9393960	2.405e-10	2.185e-06	OR11A1
6	rs10807056	2.602e-10	2.758e-06	OR11A1
6	rs7349908	2.667e-10	2.085e-06	OR11A1
6	rs7349863	2.695e-10	2.761e-06	OR11A1
6	rs9368600	7.217e-09	3.495e-06	OR11A1
6	rs9393958	2.089e-10	2.095e-06	OR12D1
6	rs12207410	2.129e-10	1.712e-06	OR12D1
6	rs12193979	2.158e-10	2.095e-06	OR12D1
6	rs12202249	2.521e-10	1.995e-06	OR12D1
6	rs9393957	2.769e-10	2.049e-06	OR12D1
6	rs3029487	3.039e-10	2.298e-06	OR12D1
6	rs9348829	2.891e-10	3.335e-06	OR12D2
6	rs2073152	2.891e-10	3.335e-06	OR12D2
6	rs1592404	3.067e-10	3.372e-06	OR12D2
6	rs9405124	3.231e-10	3.333e-06	OR12D2
6	rs147352225	6.723e-09	1.076e-05	OR2B3
6	rs1419635	8.72e-11	3.261e-06	OR5V1
6	rs9380123	2.726e-10	3.009e-06	OR5V1
6	rs2394608	2.868e-10	3.802e-06	OR5V1
6	rs10946988	2.891e-10	3.335e-06	OR5V1
6	rs1362061	3.985e-10	3.365e-06	OR5V1
6	rs6913070	2.105e-30	2.248e-11	POU5F1
6	rs117588763	2.882e-30	3.548e-11	POU5F1
6	rs9357112	2.882e-30	3.548e-11	POU5F1
6	rs9357114	2.882e-30	3.548e-11	POU5F1
6	rs9348855	2.882e-30	3.548e-11	POU5F1
6	rs4713439	3.473e-30	4.104e-11	POU5F1
6	rs9391817	1.643e-28	1.182e-11	POU5F1
6	rs1265160	7.056e-21	5.584e-10	POU5F1
6	rs1265163	1.989e-20	5.252e-10	POU5F1
6	rs9357113	1.403e-15	2.219e-09	POU5F1
6	rs9380221	1.403e-15	2.219e-09	POU5F1
6	rs1052989	1.915e-15	2.989e-09	POU5F1
6	rs11967629	2.03e-15	3.477e-09	POU5F1
6	rs915660	2.075e-15	2.855e-09	POU5F1
6	rs9380220	2.151e-15	3.152e-09	POU5F1
6	rs11507945	2.517e-15	3.716e-09	POU5F1
6	rs9357109	2.591e-15	2.248e-09	POU5F1
6	rs1265156	7.354e-14	1.868e-06	POU5F1
6	rs3132520	1.546e-12	8.497e-06	POU5F1
6	rs885952	2.21e-12	1.12e-06	POU5F1
6	rs885951	3.5e-12	6.702e-07	POU5F1
6	rs2077010	4.12e-12	7.329e-07	POU5F1
6	rs9468882	5.172e-12	4.016e-07	POU5F1
6	rs885950	5.871e-12	1.836e-07	POU5F1
6	rs887464	6.041e-12	5.383e-07	POU5F1
6	rs13409	6.529e-12	1.049e-06	POU5F1
6	rs9394040	1.544e-10	8.015e-06	POU5F1
6	rs9357111	1.544e-10	8.015e-06	POU5F1
6	rs28383836	2.072e-10	1.335e-05	POU5F1
6	rs3868542	2.096e-10	9.961e-06	POU5F1
6	rs3871248	2.096e-10	9.961e-06	POU5F1
6	rs9501066	2.096e-10	1.021e-05	POU5F1
6	rs9391816	2.251e-10	1.046e-05	POU5F1
6	rs28383835	2.32e-10	1.15e-05	POU5F1
6	rs4947305	2.376e-10	1.152e-05	POU5F1
6	rs7770946	2.376e-10	1.152e-05	POU5F1
6	rs3871246	2.376e-10	1.152e-05	POU5F1
6	rs9368657	2.376e-10	1.152e-05	POU5F1
6	rs9368658	2.376e-10	1.152e-05	POU5F1
6	rs9357110	2.376e-10	1.152e-05	POU5F1
6	rs3871247	2.466e-10	1.162e-05	POU5F1
6	rs887466	3.088e-10	1.071e-05	POU5F1
6	rs1265155	3.508e-10	1.415e-05	POU5F1
6	rs7751130	1.108e-09	6.292e-06	POU5F1
6	rs9348841	2.184e-24	1.854e-11	PPP1R10
6	rs2239888	2.421e-11	2.68e-10	PPP1R18
6	rs2844634	1.969e-14	4.393e-07	PSORS1C1
6	rs2844633	2.146e-14	5.754e-07	PSORS1C1
6	rs3130559	2.774e-13	4.081e-06	PSORS1C1
6	rs3094196	8.558e-13	1.394e-05	PSORS1C1
6	rs3132569	1.515e-12	3.851e-06	PSORS1C1
6	rs3132570	2.352e-12	4.241e-06	PSORS1C1
6	rs3094198	5.251e-12	7.217e-06	PSORS1C1
6	rs2021719	1.123e-08	5.593e-06	RANP1
6	rs9295898	1.219e-08	5.849e-06	RANP1
6	rs2021720	1.219e-08	5.849e-06	RANP1
6	rs6921669	1.219e-08	5.849e-06	RANP1
6	rs117133761	1.442e-17	3.33e-07	RF00019
6	rs9393991	1.241e-16	5.481e-11	RF00554
6	rs138020512	2.159e-09	5.308e-06	RF00554
6	rs9295949	3.221e-13	1.002e-05	RNU6-1133P
6	rs9295950	3.221e-13	1.002e-05	RNU6-1133P
6	rs12527394	3.327e-13	6.829e-06	RNU6-1133P
6	rs9380215	4.265e-13	1.319e-05	RNU6-1133P
6	rs9380217	4.265e-13	1.319e-05	RNU6-1133P
6	rs55756482	4.697e-13	9.422e-06	RNU6-1133P
6	rs9263477	4.697e-13	9.422e-06	RNU6-1133P
6	rs4713431	5.446e-13	9.972e-06	RNU6-1133P
6	rs969893	2.239e-11	1.902e-07	RNU6-603P
6	rs6907226	2.591e-11	2.409e-07	RNU6-603P
6	rs1265763	2.845e-11	1.898e-07	RNU6-603P
6	rs9268302	2.988e-11	1.944e-07	RNU6-603P
6	rs2076537	3.111e-11	1.5e-07	RNU6-603P
6	rs2223638	3.348e-11	2.303e-07	RNU6-603P
6	rs6930477	3.348e-11	2.303e-07	RNU6-603P
6	rs6149518	3.383e-11	2.428e-07	RNU6-603P
6	rs6907322	3.493e-11	1.75e-07	RNU6-603P
6	rs3117122	3.979e-11	1.813e-07	RNU6-603P
6	rs910050	4.075e-11	1.448e-07	RNU6-603P
6	rs969891	4.652e-11	1.812e-07	RNU6-603P
6	rs3117121	4.652e-11	1.812e-07	RNU6-603P
6	rs3117120	4.652e-11	1.812e-07	RNU6-603P
6	rs2076539	4.652e-11	1.812e-07	RNU6-603P
6	rs34298056	5.492e-11	4.012e-07	RNU6-603P
6	rs9368581	9.174e-11	1.521e-05	RNU6-930P
14	rs4903961	5.438e-20	1.325e-08	RPL17P3
14	rs4903962	6.084e-19	1.629e-08	RPL17P3
14	rs2268459	6.613e-19	4.758e-08	RPL17P3
14	rs12323356	1.054e-18	1.715e-08	RPL17P3
6	rs9296003	3.733e-15	1.884e-06	SKIV2L
6	rs12176594	7.635e-16	1.237e-07	SUCLA2P1
6	rs77072171	7.635e-16	1.237e-07	SUCLA2P1
6	rs9295895	3.542e-13	6.946e-07	SUCLA2P1
6	rs9461613	1.095e-08	3.494e-06	SUCLA2P1
6	rs12174870	1.373e-08	5.338e-06	SUCLA2P1
6	rs9295896	1.373e-08	5.338e-06	SUCLA2P1
6	rs35600573	1.373e-08	5.338e-06	SUCLA2P1
6	rs6929424	1.373e-08	5.338e-06	SUCLA2P1
6	rs7761210	1.438e-08	5.088e-06	SUCLA2P1
6	rs13202930	1.616e-08	4.964e-06	SUCLA2P1
6	rs9391763	3.496e-08	1.329e-05	SUCLA2P1
6	rs117689957	5.898e-18	9.16e-07	TNXB
6	rs117565607	4.478e-17	1.774e-10	TRIM26
6	rs117405699	8.43e-09	3.105e-06	TRIM26
6	rs147480718	1.065e-12	6.492e-06	TSBP1
6	rs3129942	6.037e-12	4.035e-06	TSBP1
6	rs6917075	1.525e-11	2.023e-07	TSBP1
6	rs9268347	2.797e-11	2.486e-07	TSBP1
6	rs9268361	2.889e-11	2.016e-07	TSBP1
6	rs9268303	2.936e-11	1.912e-07	TSBP1
6	rs1076712	3.308e-11	1.967e-07	TSBP1
6	rs9268378	3.323e-11	2.511e-07	TSBP1
6	rs6903816	3.323e-11	2.511e-07	TSBP1
6	rs1967437	3.323e-11	2.511e-07	TSBP1
6	rs9268330	3.348e-11	2.303e-07	TSBP1
6	rs6415129	3.348e-11	2.303e-07	TSBP1
6	rs9268350	3.348e-11	2.303e-07	TSBP1
6	rs9268364	3.348e-11	2.303e-07	TSBP1
6	rs9268367	3.348e-11	2.303e-07	TSBP1
6	rs4389802	3.37e-11	1.289e-07	TSBP1
6	rs3117134	3.499e-11	1.5e-07	TSBP1
6	rs9268365	3.611e-11	2.799e-07	TSBP1
6	rs9268356	4.137e-11	3.024e-07	TSBP1
6	rs3132954	4.595e-11	3.762e-06	TSBP1
6	rs3129902	4.652e-11	1.812e-07	TSBP1
6	rs3117136	4.652e-11	1.812e-07	TSBP1
6	rs7383143	4.652e-11	1.812e-07	TSBP1
6	rs9281746	4.652e-11	1.812e-07	TSBP1
6	rs2395147	4.652e-11	1.812e-07	TSBP1
6	rs3117131	4.652e-11	1.812e-07	TSBP1
6	rs9268314	4.729e-11	1.398e-07	TSBP1
6	rs1474727	5.219e-11	1.401e-07	TSBP1
6	rs7744155	6.881e-11	3.085e-07	TSBP1
6	rs9268315	7.451e-11	2.105e-07	TSBP1
6	rs9268399	8.173e-11	1.561e-05	TSBP1
6	rs71918165	8.473e-11	3.703e-07	TSBP1
6	rs2223636	1.073e-10	6.011e-06	TSBP1
6	rs2273019	1.18e-10	3.054e-06	TSBP1
6	rs3117130	1.503e-10	2.184e-07	TSBP1
6	rs9268325	3.182e-10	3.257e-07	TSBP1
6	rs145036746	1.842e-13	1.131e-05	TSBP1-AS1
6	rs117146138	7.675e-13	4.896e-06	TSBP1-AS1
6	rs117966254	1.083e-12	4.598e-06	TSBP1-AS1
6	rs9405095	1.137e-12	4.581e-06	TSBP1-AS1
6	rs9380292	1.137e-12	4.581e-06	TSBP1-AS1
14	rs2160215	4.445e-20	8.985e-09	TSHR
14	rs1023586	4.445e-20	8.985e-09	TSHR
14	rs28414437	1.053e-19	1.248e-08	TSHR
14	rs11159479	1.683e-18	2.976e-08	TSHR
14	rs56389234	1.683e-18	2.976e-08	TSHR
14	rs6574617	4.087e-18	3.458e-08	TSHR
14	rs10145099	4.828e-18	3.924e-08	TSHR
14	rs2371463	6.641e-18	4.222e-08	TSHR
14	rs724170	2.069e-17	5.364e-08	TSHR
6	rs3869091	1.958e-16	4.385e-07	VARS2
6	rs9357103	1.958e-16	4.385e-07	VARS2
6	rs9380151	2.632e-17	2.421e-10	ZNRD1ASP

## Sheet: Chr and gene name
Discovery			Replication
CHR	SNP	UNADJ	UNADJ	geneID		Discovery	<5*10-8	1. with gene ame?
2	rs231779	1.831e-14	8.529e-06	CTLA4		Replication	<1.75*10-5	2. Chr Small to Bog
2	rs1427680	2.072e-14	8.15e-06	CTLA4				3. Di UNADJ Small to Bog
2	rs736611	2.186e-14	9.962e-06	CTLA4				4. Re UNADJ Small to Bog
2	rs11571315	2.188e-14	9.432e-06	CTLA4
2	rs231723	3.236e-14	9.247e-06	CTLA4
2	rs3087243	8.749e-13	6.086e-07	CTLA4
2	rs11571316	1.148e-12	5.653e-07	CTLA4
2	rs11571302	6.59e-09	1.503e-05	CTLA4
2	rs7565213	8.52e-09	1.448e-05	CTLA4
6	rs117116160	7.726e-33	1.227e-12	HCP5
6	rs117884751	2.558e-32	1.762e-12	HCP5
6	rs142459005	5.976e-32	2.703e-12	AL671883.2
6	rs141618471	1.009e-31	2.308e-13	HLA-B
6	rs9378228	1.704e-31	4.476e-12	HLA-B
6	rs9357105	2.342e-31	4.313e-12	MUC22
6	rs6913070	2.105e-30	2.248e-11	POU5F1
6	rs117588763	2.882e-30	3.548e-11	POU5F1
6	rs9357112	2.882e-30	3.548e-11	POU5F1
6	rs9357114	2.882e-30	3.548e-11	POU5F1
6	rs9348855	2.882e-30	3.548e-11	POU5F1
6	rs4713439	3.473e-30	4.104e-11	POU5F1
6	rs28483421	3.941e-30	3.112e-11	AL662844.3
6	rs9378226	4.054e-30	4.71e-11	AL662844.4
6	rs4122190	6.518e-30	2.814e-11	AL662844.3
6	rs117333063	8.255e-30	2.652e-11	AL662844.3
6	rs10947158	1.871e-29	1.214e-10	AL662844.1
6	rs12524692	7.741e-29	1.761e-12	HLA-B
6	rs9391817	1.643e-28	1.182e-11	POU5F1
6	rs28652698	3.568e-28	2.057e-11	CCHCR1
6	rs72860306	5.838e-28	2.162e-11	HLA-B
6	rs3819683	1.39e-26	4.828e-09	CDSN
6	rs9469112	3.301e-26	1.714e-10	HLA-DRA
6	rs9391634	7.584e-26	1.654e-11	LINC00243
6	rs9357135	1.466e-25	1.962e-08	LST1
6	rs3763287	5.249e-25	1.413e-11	HCP5
6	rs143982339	1.661e-24	1.673e-11	ABCF1
6	rs9348841	2.184e-24	1.854e-11	PPP1R10
6	rs7770920	3.508e-24	1.697e-10	HLA-DRB9
6	rs6457596	3.508e-24	1.697e-10	HLA-DRB9
6	rs111573974	3.508e-24	1.697e-10	HLA-DRB9
6	rs6924760	3.523e-24	1.714e-10	HLA-DRB9
6	rs9286789	3.523e-24	1.714e-10	HLA-DRB9
6	rs17203039	3.523e-24	1.714e-10	HLA-DRB9
6	rs11759730	3.523e-24	1.714e-10	HLA-DRB9
6	rs9461755	3.523e-24	1.714e-10	HLA-DRB9
6	rs9461756	3.523e-24	1.714e-10	HLA-DRB9
6	rs2071805	3.523e-24	1.714e-10	HLA-DRB9
6	rs61550563	3.523e-24	1.714e-10	HLA-DRB9
6	rs17209754	3.523e-24	1.714e-10	HLA-DRB9
6	rs17209768	3.523e-24	1.714e-10	HLA-DRB9
6	rs17203430	3.523e-24	1.714e-10	HLA-DRB9
6	rs17203444	3.523e-24	1.714e-10	HLA-DRB9
6	rs17209803	3.523e-24	1.714e-10	HLA-DRB9
6	rs17203458	3.523e-24	1.714e-10	HLA-DRB9
6	rs148948227	3.559e-24	1.598e-10	HLA-DRB9
6	rs11753780	3.559e-24	1.626e-10	HLA-DRB9
6	rs9469129	3.693e-24	1.691e-10	HLA-DRB9
6	rs9469130	3.693e-24	1.691e-10	HLA-DRB9
6	rs114202986	4.604e-24	3.452e-10	HCP5
6	rs3763288	5.038e-24	3.875e-10	HCP5
6	rs73729294	6.368e-24	2.465e-10	HLA-DRB9
6	rs9469120	6.384e-24	2.717e-10	HLA-DRB9
6	rs9380182	7.951e-24	1.158e-12	FLOT1
6	rs9394070	8.181e-24	1.613e-10	AL645933.2
6	rs9348874	8.495e-24	2.458e-09	AL663061.1
6	rs12524487	1.091e-23	7.226e-10	HLA-S
6	rs117295261	2.295e-23	3.29e-09	MUCL3
6	rs2596466	5.155e-23	3.019e-11	HCP5
6	rs3132506	1.09e-22	2.874e-10	HCG27
6	rs2516471	1.107e-22	2.606e-11	HCP5
6	rs2263323	1.228e-22	3.435e-11	HCP5
6	rs16822660	1.358e-22	1.942e-08	HLA-DRA
6	rs3130949	1.4e-22	5.382e-10	AL662844.1
6	rs2394886	1.463e-22	2.132e-09	AL662844.1
6	rs9380254	1.815e-22	3.255e-11	HCP5
6	rs76187645	1.904e-22	9.759e-09	HLA-DRB9
6	rs9501639	2.036e-22	1.009e-08	HLA-DRB9
6	rs9357133	2.101e-22	2.707e-11	HCP5
6	rs9380181	2.976e-22	5.013e-11	ABCF1
6	rs143128695	2.976e-22	5.013e-11	ATAT1
6	rs2848709	5.637e-22	3.513e-09	HCP5
6	rs151195028	5.74e-22	8.826e-12	DHX16
6	rs2524279	7.649e-22	1.257e-10	HCP5
6	rs9357121	9.242e-22	4.977e-12	HLA-B
6	rs9366775	1.429e-21	5.838e-12	HLA-B
6	rs4298345	1.638e-21	6.464e-12	HLA-B
6	rs56356836	2.388e-21	4.535e-12	HLA-B
6	rs9405016	2.388e-21	4.535e-12	HLA-B
6	rs12529015	2.388e-21	4.535e-12	HLA-B
6	rs9368669	2.388e-21	4.535e-12	HLA-B
6	rs9469113	2.495e-21	1.551e-07	HLA-DRA
6	rs56083136	2.686e-21	1.711e-07	HLA-DRB9
6	rs9501640	2.686e-21	1.711e-07	HLA-DRB9
6	rs9391714	2.901e-21	4.408e-12	HLA-B
6	rs35286068	4.187e-21	2.184e-07	HLA-DRB9
6	rs2233972	4.701e-21	8.37e-09	C6orf15
6	rs9380234	5.626e-21	3.448e-12	HLA-B
6	rs1265160	7.056e-21	5.584e-10	POU5F1
6	rs9391724	1.438e-20	6.326e-10	AL671883.2
6	rs28383832	1.703e-20	6.47e-10	CCHCR1
6	rs1265082	1.835e-20	4.211e-10	CCHCR1
6	rs1265113	1.835e-20	4.211e-10	CCHCR1
6	rs1265163	1.989e-20	5.252e-10	POU5F1
6	rs1265090	2.125e-20	1.428e-10	CCHCR1
6	rs1265107	2.399e-20	4.296e-10	CCHCR1
6	rs1265110	2.482e-20	4.296e-10	CCHCR1
6	rs9391848	3.382e-20	6.511e-11	AL671883.2
6	rs10807081	5.416e-20	6.157e-11	AL662844.3
6	rs3828913	1.073e-19	8.515e-07	MICB
6	rs2524280	1.18e-19	3.523e-09	HCP5
6	rs11751673	1.923e-19	2.986e-11	HLA-DRB1
6	rs11756331	1.923e-19	2.986e-11	HLA-DRB1
6	rs11752229	1.923e-19	2.986e-11	HLA-DRB1
6	rs11756836	1.923e-19	2.986e-11	HLA-DRB1
6	rs7749350	1.923e-19	2.986e-11	HLA-DRB1
6	rs72860304	2.02e-19	6.021e-06	HLA-B
6	rs2523684	2.075e-19	1.749e-08	AL645933.1
6	rs9368667	2.222e-19	5.937e-06	HLA-B
6	rs67156613	2.222e-19	5.937e-06	HLA-B
6	rs9391846	2.473e-19	1.631e-10	HLA-B
6	rs2266161	2.986e-19	1.249e-07	HCP5
6	rs10807087	3.26e-19	1.076e-05	HLA-B
6	rs9391774	3.289e-19	4.953e-11	HLA-B
6	rs9368672	3.708e-19	1.754e-11	HLA-B
6	rs6918048	3.708e-19	1.846e-11	HLA-B
6	rs9348864	3.767e-19	8.512e-11	HLA-B
6	rs148136265	3.767e-19	8.512e-11	HLA-B
6	rs56229131	4.193e-19	4.855e-06	HLA-B
6	rs55813549	4.343e-19	5.032e-11	HLA-B
6	rs114985235	4.808e-19	2.189e-11	HLA-B
6	rs116589426	4.808e-19	2.189e-11	HLA-B
6	rs114151681	4.808e-19	2.189e-11	HLA-B
6	rs9380241	4.808e-19	2.189e-11	HLA-B
6	rs56244255	4.808e-19	2.243e-11	HLA-B
6	rs56334149	4.808e-19	2.243e-11	HLA-B
6	rs12526259	4.808e-19	2.243e-11	HLA-B
6	rs149308954	4.808e-19	2.243e-11	HLA-B
6	rs9380242	4.836e-19	2.189e-11	AL671883.1
6	rs9394053	4.986e-19	8.45e-11	HLA-B
6	rs7761855	5e-19	2.321e-11	HLA-B
6	rs9405028	5.864e-19	3.952e-11	HLA-B
6	rs67494727	5.864e-19	3.952e-11	HLA-B
6	rs9405074	6.567e-19	4.144e-11	HLA-B
6	rs56262493	6.576e-19	4.438e-11	HLA-B
6	rs56353634	6.584e-19	4.749e-11	HLA-B
6	rs6906714	6.604e-19	4.501e-11	HLA-B
6	rs9295984	6.863e-19	4.438e-11	HLA-B
6	rs6919086	7.273e-19	7.331e-10	HLA-B
6	rs200983150	7.426e-19	2.951e-09	HLA-B
6	rs200291258	7.426e-19	2.951e-09	HLA-B
6	rs9394054	7.436e-19	1.498e-11	HLA-B
6	rs200335735	7.585e-19	4.908e-11	HLA-B
6	rs12174571	7.768e-19	4.908e-11	HLA-B
6	rs9391719	7.768e-19	4.908e-11	HLA-B
6	rs72502563	7.768e-19	5.146e-11	HLA-B
6	rs60091015	7.768e-19	5.146e-11	HLA-B
6	rs4492231	7.768e-19	5.146e-11	HLA-B
6	rs72502564	7.768e-19	5.146e-11	HLA-B
6	rs115034963	7.768e-19	5.146e-11	HLA-B
6	rs115190576	7.768e-19	5.146e-11	HLA-B
6	rs72502565	7.768e-19	5.146e-11	HLA-B
6	rs9295982	7.819e-19	5.146e-11	HLA-B
6	rs9391641	7.891e-19	5.146e-11	HLA-B
6	rs9295980	7.891e-19	5.146e-11	HLA-B
6	rs9283890	7.891e-19	5.146e-11	HLA-B
6	rs115813673	7.902e-19	4.908e-11	HLA-B
6	rs55674503	8.068e-19	4.645e-11	HLA-B
6	rs56280537	8.203e-19	4.608e-11	HLA-B
6	rs4311503	8.304e-19	5.146e-11	HLA-B
6	rs9366785	8.347e-19	5.344e-08	BAG6
6	rs6919058	8.49e-19	5.146e-11	HLA-B
6	rs6942380	8.49e-19	5.146e-11	HLA-B
6	rs9378155	8.49e-19	5.146e-11	HLA-B
6	rs9378156	8.49e-19	5.146e-11	HLA-B
6	rs4527750	8.687e-19	4.854e-11	HLA-B
6	rs9391841	8.687e-19	4.854e-11	HLA-B
6	rs9405025	1.083e-18	2.011e-09	HLA-B
6	rs116685461	1.12e-18	6.018e-11	HLA-B
6	rs9405031	1.12e-18	6.018e-11	HLA-B
6	rs9391843	1.12e-18	6.018e-11	HLA-B
6	rs114317621	1.232e-18	7.388e-11	HLA-B
6	rs150527794	1.232e-18	7.388e-11	HLA-B
6	rs17205373	1.252e-18	8.08e-06	HLA-DQB1
6	rs9368648	1.27e-18	1.413e-07	HCG21
6	rs72502566	1.273e-18	5.306e-11	HLA-B
6	rs12173768	1.273e-18	5.306e-11	HLA-B
6	rs28362611	1.328e-18	6.555e-08	DDR1
6	rs138928713	1.4e-18	6.177e-06	HLA-B
6	rs9348858	1.409e-18	5.31e-06	HLA-B
6	rs34540685	1.602e-18	9.044e-11	HLA-B
6	rs33998388	1.602e-18	9.044e-11	HLA-B
6	rs9380231	1.71e-18	9.18e-06	HLA-B
6	rs9391637	1.721e-18	8.078e-08	HCG21
6	rs9368668	1.724e-18	9.18e-06	HLA-B
6	rs9378199	1.728e-18	2.218e-09	HLA-B
6	rs118097312	1.838e-18	2.171e-07	C2
6	rs2286654	1.866e-18	7.041e-08	MUCL3
6	rs9368683	1.885e-18	3.116e-11	HLA-B
6	rs9295937	1.907e-18	1.953e-07	NAPGP2
6	rs4711250	1.963e-18	1.536e-07	NAPGP2
6	rs9394047	2.06e-18	1.73e-05	HLA-B
6	rs9357124	2.573e-18	9.395e-10	AL671883.1
6	rs9275500	2.714e-18	1.152e-05	MTCO3P1
6	rs28600230	2.76e-18	1.586e-09	AL671883.1
6	rs28771426	2.844e-18	5.013e-11	HLA-B
6	rs9368677	2.889e-18	9.518e-10	AL671883.1
6	rs9378157	2.896e-18	6.543e-11	HLA-B
6	rs9368647	3.079e-18	1.266e-07	HCG21
6	rs371013749	3.52e-18	2.478e-08	DDR1
6	rs139336381	4.114e-18	1.632e-07	ABHD16A
6	rs71732848	4.129e-18	4.328e-07	HCG21
6	rs4711248	4.362e-18	1.93e-07	MUCL3
6	rs9391834	4.367e-18	2.121e-09	HLA-B
6	rs9405076	4.367e-18	2.121e-09	HLA-B
6	rs9262630	4.384e-18	5.508e-07	HCG22
6	rs2524075	4.443e-18	2.583e-09	HLA-B
6	rs12234123	4.817e-18	6.773e-10	HLA-B
6	rs3130696	4.872e-18	2.64e-09	HLA-B
6	rs12525626	5.459e-18	2.013e-09	HLA-B
6	rs9262651	5.624e-18	8.974e-07	HCG22
6	rs117689957	5.898e-18	9.16e-07	TNXB
6	rs9380235	6.061e-18	1.115e-09	HLA-B
6	rs9405073	6.416e-18	2.532e-09	HLA-B
6	rs9394050	6.738e-18	1.087e-09	HLA-B
6	rs28367586	6.765e-18	1.026e-09	HLA-B
6	rs9380232	7.208e-18	1.122e-09	HLA-B
6	rs9295968	7.208e-18	1.122e-09	HLA-B
6	rs9394049	7.427e-18	6.497e-10	HLA-B
6	rs9262636	7.515e-18	4.832e-07	HCG22
6	rs9262638	7.515e-18	4.832e-07	HCG22
6	rs9262639	7.515e-18	4.832e-07	HCG22
6	rs9262648	7.515e-18	4.832e-07	HCG22
6	rs28563838	7.631e-18	1.451e-09	HLA-B
6	rs7356893	7.645e-18	4.892e-07	HCG22
6	rs9262654	7.673e-18	4.862e-07	HCG22
6	rs9295945	7.697e-18	9.057e-07	HCG22
6	rs3764808	7.799e-18	5.013e-07	HCG22
6	rs9281117	8.023e-18	1.605e-06	HCG22
6	rs2394427	8.049e-18	1.044e-06	HCG22
6	rs2394423	8.275e-18	5.029e-07	HCG22
6	rs9348844	8.503e-18	6.756e-08	LINC00243
6	rs9394032	8.524e-18	9.287e-07	HCG22
6	rs9380211	8.524e-18	9.287e-07	HCG22
6	rs9295946	8.524e-18	9.287e-07	HCG22
6	rs9295947	8.524e-18	9.287e-07	HCG22
6	rs9295948	8.524e-18	9.287e-07	HCG22
6	rs2394426	8.524e-18	9.287e-07	HCG22
6	rs2894048	8.524e-18	9.287e-07	HCG22
6	rs2394425	8.524e-18	9.287e-07	HCG22
6	rs9357106	8.524e-18	9.287e-07	HCG22
6	rs3888579	8.524e-18	9.287e-07	HCG22
6	rs6919310	8.717e-18	7.843e-10	HLA-B
6	rs9391715	8.717e-18	7.843e-10	HLA-B
6	rs9394048	8.947e-18	1.292e-09	HLA-B
6	rs151115972	8.989e-18	3.63e-07	CLIC1
6	rs118062293	9.955e-18	4.493e-07	AL662899.1
6	rs9262642	1.075e-17	4.47e-07	HCG22
6	rs9262618	1.119e-17	4.874e-07	HCG22
6	rs9262620	1.119e-17	4.874e-07	HCG22
6	rs9262633	1.119e-17	4.874e-07	HCG22
6	rs9262635	1.119e-17	4.874e-07	HCG22
6	rs9262637	1.119e-17	4.874e-07	HCG22
6	rs9262640	1.119e-17	4.874e-07	HCG22
6	rs9262641	1.119e-17	4.874e-07	HCG22
6	rs7741049	1.119e-17	4.874e-07	HCG22
6	rs7741474	1.119e-17	4.874e-07	HCG22
6	rs9262646	1.119e-17	4.874e-07	HCG22
6	rs9262647	1.119e-17	4.874e-07	HCG22
6	rs9278856	1.119e-17	4.874e-07	HCG22
6	rs9262650	1.119e-17	4.874e-07	HCG22
6	rs9262622	1.136e-17	4.359e-07	HCG22
6	rs3841160	1.177e-17	1.036e-05	HLA-DPA1
6	rs12662112	1.177e-17	1.036e-05	HLA-DPA1
6	rs9469126	1.298e-17	1.898e-08	HLA-DRB9
6	rs373939101	1.302e-17	1.912e-08	HLA-DRB9
6	rs189964538	1.302e-17	1.912e-08	HLA-DRB9
6	rs35656734	1.333e-17	1.407e-09	HLA-DQA1
6	rs150971595	1.377e-17	5.386e-08	GABBR1
6	rs117133761	1.442e-17	3.33e-07	RF00019
6	rs17205191	1.461e-17	5.2e-10	HLA-DQA1
6	rs35585151	1.476e-17	8.826e-10	HLA-DQA1
6	rs142774403	1.555e-17	2.335e-08	HLA-DRB9
6	rs115566240	1.682e-17	3.041e-10	HLA-DQA1
6	rs9262616	1.812e-17	4.832e-07	HCG22
6	rs117416277	1.985e-17	5.074e-10	AL662795.2
6	rs59406271	2.067e-17	2.919e-08	HLA-DRB9
6	rs181534481	2.135e-17	3.042e-08	HLA-DQA1
6	rs17206287	2.182e-17	4.175e-08	MTCO3P1
6	rs3906263	2.214e-17	8.658e-07	HCG22
6	rs6930660	2.468e-17	2.685e-09	AL671883.1
6	rs9380151	2.632e-17	2.421e-10	ZNRD1ASP
6	rs9262634	2.895e-17	1.163e-06	HCG22
6	rs7745521	2.895e-17	1.163e-06	HCG22
6	rs9366783	4.148e-17	1.976e-08	HCP5
6	rs117565607	4.478e-17	1.774e-10	TRIM26
6	rs12174396	4.482e-17	1.976e-08	HCP5
6	rs6912893	5.233e-17	5.519e-10	HLA-B
6	rs9393991	1.241e-16	5.481e-11	RF00554
6	rs375217182	1.825e-16	1.951e-08	HLA-DQB1
6	rs4637682	1.854e-16	2.563e-08	HLA-B
6	rs12173764	1.873e-16	2.347e-08	HLA-B
6	rs3869091	1.958e-16	4.385e-07	VARS2
6	rs9357103	1.958e-16	4.385e-07	VARS2
6	rs9404935	2.086e-16	3.593e-07	DDR1
6	rs75791723	2.388e-16	1.478e-08	AL645939.4
6	rs9368645	2.388e-16	3.779e-07	DDR1
6	rs117589205	2.661e-16	1.803e-07	LINC02570
6	rs115700690	2.722e-16	7.949e-06	HLA-DQA1
6	rs9366762	2.767e-16	4.654e-07	DDR1
6	rs4397267	3.026e-16	1.867e-08	HLA-B
6	rs139558884	3.24e-16	3.55e-06	HLA-DQA1
6	rs115908946	3.324e-16	6.987e-06	HLA-DQA1
6	rs115016190	3.496e-16	6.696e-06	HLA-DQA1
6	rs146217951	3.496e-16	6.696e-06	HLA-DQA1
6	rs77639852	3.496e-16	6.696e-06	HLA-DQA1
6	rs78692977	3.496e-16	6.696e-06	HLA-DQA1
6	rs76822178	3.496e-16	6.696e-06	HLA-DQA1
6	rs79473311	3.496e-16	6.696e-06	HLA-DQA1
6	rs79573551	3.496e-16	6.696e-06	HLA-DQA1
6	rs114088880	3.537e-16	7.065e-06	HLA-DQA1
6	rs367728179	3.623e-16	7.565e-06	HLA-DQA1
6	rs9272140	3.623e-16	7.565e-06	HLA-DQA1
6	rs115223053	3.629e-16	7.565e-06	HLA-DQA1
6	rs115711192	3.637e-16	7.154e-06	HLA-DQA1
6	rs150015489	3.637e-16	7.154e-06	HLA-DQA1
6	rs114027542	3.637e-16	7.154e-06	HLA-DQA1
6	rs373813924	3.637e-16	7.154e-06	HLA-DQA1
6	rs146353211	3.637e-16	7.154e-06	HLA-DQA1
6	rs117055012	3.637e-16	7.154e-06	HLA-DQA1
6	rs114352945	3.637e-16	7.154e-06	HLA-DQA1
6	rs114762033	3.637e-16	7.154e-06	HLA-DQA1
6	rs563316064	3.637e-16	7.154e-06	HLA-DQA1
6	rs575430623	3.637e-16	7.154e-06	HLA-DQA1
6	rs371537406	3.637e-16	7.154e-06	HLA-DQA1
6	rs114799674	3.637e-16	7.154e-06	HLA-DQA1
6	rs115573799	3.637e-16	7.154e-06	HLA-DQA1
6	rs115503527	3.637e-16	7.154e-06	HLA-DQA1
6	rs28534011	3.637e-16	7.154e-06	HLA-DQA1
6	rs565181451	3.637e-16	7.154e-06	HLA-DQA1
6	rs545248976	3.637e-16	7.154e-06	HLA-DQA1
6	rs28417660	3.637e-16	7.154e-06	HLA-DQA1
6	rs372332783	3.637e-16	7.154e-06	HLA-DQA1
6	rs199950886	3.637e-16	7.154e-06	HLA-DQA1
6	rs114895321	3.637e-16	7.154e-06	HLA-DQA1
6	rs115717621	3.637e-16	7.154e-06	HLA-DQA1
6	rs114025574	3.637e-16	7.154e-06	HLA-DQA1
6	rs114774960	3.637e-16	7.154e-06	HLA-DQA1
6	rs115493697	3.637e-16	7.154e-06	HLA-DQA1
6	rs115139056	3.637e-16	7.154e-06	HLA-DQA1
6	rs559861992	3.637e-16	7.154e-06	HLA-DQA1
6	rs116236894	3.637e-16	7.154e-06	HLA-DQA1
6	rs115296161	3.637e-16	7.154e-06	HLA-DQA1
6	rs182013486	3.637e-16	7.154e-06	HLA-DQA1
6	rs184922584	3.637e-16	7.154e-06	HLA-DQA1
6	rs181184133	3.637e-16	7.154e-06	HLA-DQA1
6	rs549131306	3.637e-16	7.154e-06	HLA-DQA1
6	rs139727756	3.637e-16	7.154e-06	HLA-DQA1
6	rs114307619	3.672e-16	7.154e-06	HLA-DQA1
6	rs115609519	3.672e-16	7.154e-06	HLA-DQA1
6	rs114307375	3.672e-16	7.154e-06	HLA-DQA1
6	rs143117432	3.672e-16	7.154e-06	HLA-DQA1
6	rs147493459	3.672e-16	7.154e-06	HLA-DQA1
6	rs116573360	3.672e-16	7.154e-06	HLA-DQA1
6	rs576628433	3.672e-16	7.154e-06	HLA-DQA1
6	rs138816958	3.672e-16	7.154e-06	HLA-DQA1
6	rs138238823	3.672e-16	7.154e-06	HLA-DQA1
6	rs146406015	3.672e-16	7.154e-06	HLA-DQA1
6	rs139692935	3.672e-16	7.154e-06	HLA-DQA1
6	rs879665507	3.672e-16	7.154e-06	HLA-DQA1
6	rs115315696	3.672e-16	7.154e-06	HLA-DQA1
6	rs550642974	3.672e-16	7.154e-06	HLA-DQA1
6	rs115624624	3.672e-16	7.154e-06	HLA-DQA1
6	rs116202168	3.672e-16	7.154e-06	HLA-DQA1
6	rs114866528	3.672e-16	7.154e-06	HLA-DQA1
6	rs116633385	3.672e-16	7.154e-06	HLA-DQA1
6	rs116109088	3.672e-16	7.154e-06	HLA-DQA1
6	rs115214276	3.672e-16	7.154e-06	HLA-DQA1
6	rs116728358	3.672e-16	7.154e-06	HLA-DQA1
6	rs114310549	3.672e-16	7.154e-06	HLA-DQA1
6	rs115231411	3.672e-16	7.154e-06	HLA-DQA1
6	rs116485389	3.672e-16	7.154e-06	HLA-DQA1
6	rs536081339	3.672e-16	7.154e-06	HLA-DQA1
6	rs368699425	3.753e-16	8.768e-06	HLA-DQA1
6	rs563648725	3.824e-16	5.486e-06	HLA-DQA1
6	rs9378150	3.929e-16	3.466e-07	DDR1
6	rs28720766	4.078e-16	8.404e-06	HLA-DQA1
6	rs116517496	4.318e-16	7.328e-06	HLA-DQA1
6	rs28449420	4.365e-16	7.385e-06	HLA-DPA1
6	rs28397282	4.406e-16	9.336e-10	AL662844.3
6	rs4122189	4.525e-16	7.091e-10	AL662844.3
6	rs114968544	4.539e-16	7.572e-06	HLA-DQA1
6	rs6900039	4.86e-16	7.336e-06	HLA-DQB1
6	rs28360064	4.875e-16	7.546e-10	AL662844.4
6	rs74606007	4.914e-16	6.579e-06	HLA-DQA1
6	rs28397285	5.5e-16	7.137e-10	AL662844.3
6	rs114308959	5.505e-16	7.057e-06	HLA-DQA1
6	rs6922744	5.947e-16	8.958e-10	AL662844.3
6	rs6922729	5.947e-16	8.958e-10	AL662844.3
6	rs9366769	5.962e-16	7.116e-10	AL662844.3
6	rs28397270	6.403e-16	9.635e-10	AL662844.3
6	rs116494205	6.93e-16	7.498e-06	HLA-DQA1
6	rs7743506	7.519e-16	7.208e-06	HLA-DQB1
6	rs12176594	7.635e-16	1.237e-07	SUCLA2P1
6	rs77072171	7.635e-16	1.237e-07	SUCLA2P1
6	rs28397274	8.461e-16	7.968e-10	AL662844.3
6	rs752245759	8.574e-16	1.507e-05	HLA-DQA1
6	rs3130667	8.584e-16	7.477e-07	HCG20
6	rs3132602	8.584e-16	7.477e-07	HCG20
6	rs3131039	8.584e-16	7.477e-07	HCG20
6	rs28635391	8.668e-16	8.985e-06	HLA-DQA1
6	rs9295960	8.677e-16	9.678e-10	AL662844.3
6	rs9391819	8.677e-16	9.678e-10	AL662844.3
6	rs7740279	9.009e-16	8.836e-07	HCG20
6	rs28360065	9.02e-16	8.39e-10	AL662844.3
6	rs28360066	9.02e-16	8.39e-10	AL662844.3
6	rs28397268	9.02e-16	8.39e-10	AL662844.3
6	rs6922077	9.1e-16	8.559e-10	AL662844.3
6	rs6901685	9.1e-16	8.559e-10	AL662844.3
6	rs6922553	9.1e-16	8.559e-10	AL662844.3
6	rs6922756	9.1e-16	8.559e-10	AL662844.3
6	rs28397271	9.1e-16	8.559e-10	AL662844.3
6	rs28397272	9.1e-16	8.559e-10	AL662844.3
6	rs28397273	9.1e-16	8.559e-10	AL662844.3
6	rs3129979	9.12e-16	9.61e-07	HCG20
6	rs9394042	9.244e-16	1.011e-09	AL662844.3
6	rs11381232	9.244e-16	1.011e-09	AL662844.3
6	rs9380223	9.244e-16	1.011e-09	AL662844.3
6	rs6899874	9.244e-16	1.011e-09	AL662844.4
6	rs4501465	1.017e-15	6.745e-07	HLA-DPA1
6	rs9296073	1.017e-15	6.745e-07	HLA-DPA1
6	rs9296074	1.017e-15	6.745e-07	HLA-DPA1
6	rs115738641	1.031e-15	3.385e-06	HLA-DQA1
6	rs2308927	1.043e-15	1.188e-06	HLA-DPA1
6	rs1126544	1.043e-15	1.188e-06	HLA-DPA1
6	rs2394402	1.114e-15	5.888e-07	HCG20
6	rs9391895	1.115e-15	1.363e-06	GPR53P
6	rs34467061	1.215e-15	5.994e-10	AL662844.3
6	rs9380340	1.302e-15	8.266e-07	HLA-DPA1
6	rs9357113	1.403e-15	2.219e-09	POU5F1
6	rs9380221	1.403e-15	2.219e-09	POU5F1
6	rs16822599	1.411e-15	3.625e-06	HLA-DRA
6	rs78103064	1.424e-15	6.758e-06	HLA-DPA1
6	rs9380222	1.448e-15	1.176e-09	AL662844.3
6	rs9266094	1.789e-15	8.522e-10	AL671883.2
6	rs1052989	1.915e-15	2.989e-09	POU5F1
6	rs4361609	1.931e-15	2.503e-07	HLA-B
6	rs77332307	2.026e-15	6.674e-09	HLA-DRB9
6	rs11967629	2.03e-15	3.477e-09	POU5F1
6	rs915660	2.075e-15	2.855e-09	POU5F1
6	rs9380220	2.151e-15	3.152e-09	POU5F1
6	rs3131002	2.258e-15	5.43e-07	CDSN
6	rs11507945	2.517e-15	3.716e-09	POU5F1
6	rs9281119	2.553e-15	4.192e-06	HCG22
6	rs9394130	2.557e-15	9.978e-07	HLA-DPA1
6	rs9357109	2.591e-15	2.248e-09	POU5F1
6	rs34075705	2.944e-15	6.029e-10	AL662844.3
6	rs9295958	3.146e-15	1.62e-09	AL662844.4
6	rs1265074	3.181e-15	3.947e-07	CCHCR1
6	rs1265089	3.186e-15	4.687e-07	CCHCR1
6	rs555111717	3.319e-15	6.961e-06	HLA-DQA1
6	rs28397275	3.335e-15	1.467e-09	AL662844.3
6	rs7755702	3.412e-15	1.839e-09	AL662844.4
6	rs2524076	3.505e-15	2.53e-06	HLA-B
6	rs3094680	3.568e-15	2.53e-06	HLA-B
6	rs28397276	3.583e-15	1.576e-09	AL662844.3
6	rs9391712	3.583e-15	1.576e-09	AL662844.3
6	rs28360067	3.652e-15	1.802e-09	AL662844.3
6	rs28397286	3.69e-15	1.839e-09	AL662844.3
6	rs28360060	3.69e-15	1.839e-09	AL662844.4
6	rs28360062	3.69e-15	1.839e-09	AL662844.4
6	rs28360063	3.69e-15	1.839e-09	AL662844.4
6	rs6936474	3.69e-15	1.839e-09	AL662844.4
6	rs6936597	3.69e-15	1.839e-09	AL662844.4
6	rs6941912	3.69e-15	1.839e-09	AL662844.4
6	rs9296003	3.733e-15	1.884e-06	SKIV2L
6	rs1265068	3.865e-15	4.111e-07	CCHCR1
6	rs1966	4.233e-15	4.864e-07	CCHCR1
6	rs142544441	4.538e-15	1.196e-05	HLA-DPA1
6	rs1265093	4.81e-15	5.978e-07	CCHCR1
6	rs60038796	4.908e-15	7.155e-06	HLA-DPA1
6	rs1126534	4.972e-15	6.389e-06	HLA-DPA1
6	rs1126533	4.972e-15	6.389e-06	HLA-DPA1
6	rs130067	4.983e-15	4.66e-07	CCHCR1
6	rs9391732	5.478e-15	3.244e-06	C4A
6	rs79541122	5.908e-15	6.742e-06	HLA-DPA1
6	rs3131921	6.725e-15	1.782e-07	MUCL3
6	rs2856816	9.177e-15	1.704e-05	HLA-DPA1
6	rs7753335	1.152e-14	1.632e-07	HLA-DRB1
6	rs16899147	1.178e-14	1.515e-08	HLA-B
6	rs9269146	1.424e-14	6.656e-07	HLA-DRB9
6	rs9296012	1.466e-14	1.699e-07	NOTCH4
6	rs6902805	1.727e-14	1.452e-07	NOTCH4
6	rs3873377	1.761e-14	1.456e-08	HLA-B
6	rs9366776	1.817e-14	1.434e-08	HLA-B
6	rs2523599	1.872e-14	3.029e-06	HLA-B
6	rs112037412	1.955e-14	2.329e-08	AL662789.1
6	rs111495201	1.955e-14	2.329e-08	AL662789.1
6	rs73396625	1.955e-14	2.329e-08	AL662789.1
6	rs2844634	1.969e-14	4.393e-07	PSORS1C1
6	rs2844633	2.146e-14	5.754e-07	PSORS1C1
6	rs17615141	2.269e-14	3.346e-08	MTCO3P1
6	rs6921855	2.273e-14	1.434e-08	HLA-B
6	rs6899660	2.273e-14	1.434e-08	HLA-B
6	rs9348860	2.273e-14	1.434e-08	HLA-B
6	rs9348861	2.273e-14	1.434e-08	HLA-B
6	rs9368670	2.273e-14	1.434e-08	HLA-B
6	rs76141334	2.273e-14	1.434e-08	HLA-B
6	rs72861464	2.273e-14	1.434e-08	HLA-B
6	rs72861465	2.273e-14	1.434e-08	HLA-B
6	rs17198727	2.273e-14	1.434e-08	HLA-B
6	rs10947169	2.273e-14	1.434e-08	HLA-B
6	rs6939681	2.273e-14	1.434e-08	HLA-B
6	rs9357122	2.273e-14	1.434e-08	HLA-B
6	rs9394051	2.273e-14	1.434e-08	HLA-B
6	rs9394052	2.273e-14	1.434e-08	HLA-B
6	rs9295969	2.273e-14	1.434e-08	HLA-B
6	rs3873381	2.273e-14	1.434e-08	HLA-B
6	rs9380236	2.273e-14	1.449e-08	HLA-B
6	rs6916525	2.348e-14	1.464e-08	HLA-B
6	rs9348862	2.61e-14	1.417e-08	HLA-B
6	rs9368671	2.726e-14	1.501e-08	HLA-B
6	rs3873382	2.766e-14	1.65e-08	HLA-B
6	rs112802378	2.969e-14	2.023e-08	MTCO3P1
6	rs116953562	2.969e-14	2.023e-08	MTCO3P1
6	rs114931041	2.969e-14	2.023e-08	MTCO3P1
6	rs116823632	2.969e-14	2.023e-08	MTCO3P1
6	rs200518968	2.969e-14	2.023e-08	MTCO3P1
6	rs112057165	2.969e-14	2.023e-08	MTCO3P1
6	rs112941700	2.969e-14	2.023e-08	MTCO3P1
6	rs113556552	2.969e-14	2.023e-08	MTCO3P1
6	rs113413656	2.969e-14	2.023e-08	MTCO3P1
6	rs547480736	2.992e-14	2.023e-08	MTCO3P1
6	rs112678772	2.992e-14	2.047e-08	MTCO3P1
6	rs117736824	2.992e-14	2.047e-08	MTCO3P1
6	rs113738873	2.992e-14	2.047e-08	MTCO3P1
6	rs112947282	2.992e-14	2.047e-08	MTCO3P1
6	rs113380489	2.992e-14	2.047e-08	MTCO3P1
6	rs112512026	2.992e-14	2.047e-08	MTCO3P1
6	rs117392376	2.992e-14	2.047e-08	MTCO3P1
6	rs112679091	2.992e-14	2.082e-08	MTCO3P1
6	rs113919826	3.03e-14	2.047e-08	MTCO3P1
6	rs111808493	3.03e-14	2.047e-08	MTCO3P1
6	rs9357123	3.206e-14	5.068e-09	HLA-B
6	rs9348863	3.218e-14	1.657e-08	HLA-B
6	rs72861484	3.3e-14	2.067e-08	HLA-B
6	rs2853923	3.391e-14	4.272e-09	HLA-B
6	rs7739302	6.208e-14	2.622e-06	HLA-DRB9
6	rs1265100	6.238e-14	2.026e-07	CCHCR1
6	rs9366777	6.814e-14	5.171e-08	HLA-B
6	rs1056429	6.979e-14	1.164e-06	AL671883.2
6	rs1265156	7.354e-14	1.868e-06	POU5F1
6	rs9380238	7.695e-14	7.736e-11	HLA-B
6	rs375407646	8.601e-14	2.65e-08	AL662789.1
6	rs2844670	1.207e-13	2.757e-09	MUC22
6	rs3217063	1.215e-13	1.741e-05	MUCL3
6	rs9393967	1.234e-13	1.798e-06	AL662860.1
6	rs12194291	1.682e-13	1.921e-07	HCG4P8
6	rs9380134	1.69e-13	1.098e-06	MOG
6	rs145036746	1.842e-13	1.131e-05	TSBP1-AS1
6	rs28481932	2.304e-13	4.335e-06	HLA-B
6	rs9266095	2.735e-13	1.088e-10	AL671883.2
6	rs3130559	2.774e-13	4.081e-06	PSORS1C1
6	rs6926927	2.978e-13	6.536e-06	AL671883.1
6	rs2517473	3.184e-13	5.496e-06	C6orf15
6	rs9295949	3.221e-13	1.002e-05	RNU6-1133P
6	rs9295950	3.221e-13	1.002e-05	RNU6-1133P
6	rs12527394	3.327e-13	6.829e-06	RNU6-1133P
6	rs3129870	3.442e-13	1.541e-05	HLA-DRA
6	rs9295895	3.542e-13	6.946e-07	SUCLA2P1
6	rs4495304	3.583e-13	8.359e-06	C6orf15
6	rs4947302	3.904e-13	6.128e-06	C6orf15
6	rs4947246	3.904e-13	6.128e-06	C6orf15
6	rs9404978	3.904e-13	6.128e-06	C6orf15
6	rs10947135	3.904e-13	6.128e-06	C6orf15
6	rs78032704	3.904e-13	6.128e-06	C6orf15
6	rs2233983	3.904e-13	6.128e-06	C6orf15
6	rs2233973	3.953e-13	6.533e-06	C6orf15
6	rs9391709	4.157e-13	6.239e-06	C6orf15
6	rs2233984	4.173e-13	5.174e-06	C6orf15
6	rs9380215	4.265e-13	1.319e-05	RNU6-1133P
6	rs9380217	4.265e-13	1.319e-05	RNU6-1133P
6	rs9391723	4.474e-13	1.322e-09	HLA-B
6	rs28380921	4.474e-13	1.322e-09	HLA-B
6	rs113356849	4.505e-13	1.61e-08	AL662789.1
6	rs55756482	4.697e-13	9.422e-06	RNU6-1133P
6	rs9263477	4.697e-13	9.422e-06	RNU6-1133P
6	rs28380922	4.752e-13	1.122e-09	HLA-B
6	rs3130945	4.782e-13	1.379e-05	AL662844.2
6	rs707913	4.788e-13	1.337e-06	C6orf15
6	rs28771422	4.889e-13	9.861e-10	HLA-B
6	rs28771421	5.074e-13	3.522e-10	HLA-B
6	rs4713431	5.446e-13	9.972e-06	RNU6-1133P
6	rs9265940	5.958e-13	1.92e-09	HLA-B
6	rs9268644	5.962e-13	1.535e-05	HLA-DRA
6	rs9391720	6.933e-13	2.083e-10	HLA-B
6	rs117146138	7.675e-13	4.896e-06	TSBP1-AS1
6	rs16897572	7.874e-13	1.963e-07	HLA-E
6	rs2233985	8.124e-13	7.684e-06	C6orf15
6	rs3094196	8.558e-13	1.394e-05	PSORS1C1
6	rs3734854	9.56e-13	1.312e-05	C6orf15
6	rs9368601	9.983e-13	7.625e-06	OR10C1
6	rs1265045	1.016e-12	1.483e-06	CDSN
6	rs2523623	1.039e-12	3.105e-10	HLA-B
6	rs147480718	1.065e-12	6.492e-06	TSBP1
6	rs117966254	1.083e-12	4.598e-06	TSBP1-AS1
6	rs28771425	1.084e-12	3.338e-10	HLA-B
6	rs5021845	1.09e-12	3.105e-10	HLA-B
6	rs2239521	1.113e-12	6.364e-07	CDSN
6	rs2239522	1.113e-12	6.364e-07	CDSN
6	rs9405095	1.137e-12	4.581e-06	TSBP1-AS1
6	rs9380292	1.137e-12	4.581e-06	TSBP1-AS1
6	rs9391859	1.137e-12	7.286e-06	BTNL2
6	rs9405096	1.137e-12	7.286e-06	BTNL2
6	rs9405097	1.18e-12	5.853e-06	BTNL2
6	rs9391860	1.18e-12	6.225e-06	BTNL2
6	rs3131001	1.227e-12	6.297e-07	CDSN
6	rs117182798	1.237e-12	5.853e-06	BTNL2
6	rs2233970	1.246e-12	4.518e-06	C6orf15
6	rs3834327	1.251e-12	6.468e-07	CDSN
6	rs3130995	1.251e-12	6.468e-07	CDSN
6	rs3095313	1.251e-12	6.468e-07	CDSN
6	rs3094207	1.251e-12	6.468e-07	CDSN
6	rs4260781	1.323e-12	1.634e-10	HLA-B
6	rs117654464	1.434e-12	4.903e-06	BTNL2
6	rs117393793	1.481e-12	4.988e-06	BTNL2
6	rs3132569	1.515e-12	3.851e-06	PSORS1C1
6	rs3130996	1.518e-12	6.292e-07	CDSN
6	rs3132520	1.546e-12	8.497e-06	POU5F1
6	rs6457566	1.551e-12	4.903e-06	BTNL2
6	rs17208706	1.551e-12	4.903e-06	BTNL2
6	rs117026188	1.551e-12	4.903e-06	BTNL2
6	rs1634769	1.557e-12	4.662e-10	HLA-B
6	rs4713457	1.65e-12	3.617e-07	HLA-B
6	rs9263869	1.732e-12	2.226e-08	AL662844.3
6	rs3132544	1.872e-12	6.476e-07	CDSN
6	rs2442719	2.009e-12	4.428e-08	AL671883.2
6	rs3095297	2.193e-12	6.052e-07	C6orf15
6	rs1062470	2.193e-12	6.052e-07	C6orf15
6	rs3094213	2.193e-12	6.052e-07	CDSN
6	rs3130990	2.193e-12	6.052e-07	CDSN
6	rs3130991	2.193e-12	6.052e-07	CDSN
6	rs2302399	2.193e-12	6.052e-07	CDSN
6	rs885952	2.21e-12	1.12e-06	POU5F1
6	rs3091255	2.219e-12	6.052e-07	CDSN
6	rs6906721	2.257e-12	1.139e-05	HLA-B
6	rs3132570	2.352e-12	4.241e-06	PSORS1C1
6	rs1126513	2.798e-12	6.457e-07	HLA-DPA1
6	rs1126511	3.135e-12	6.252e-07	HLA-DPA1
6	rs532385	3.245e-12	3.834e-06	NOTCH4
6	rs4713456	3.332e-12	7.271e-07	HLA-B
6	rs885951	3.5e-12	6.702e-07	POU5F1
6	rs3130453	3.575e-12	4.015e-07	CCHCR1
6	rs9272226	3.878e-12	1.317e-05	HLA-DQA1
6	rs2077010	4.12e-12	7.329e-07	POU5F1
6	rs117474927	4.241e-12	7.487e-10	ABCF1
6	rs2002777	4.341e-12	1.218e-05	HLA-DQA1
6	rs3094203	4.601e-12	7.922e-06	CDSN
6	rs1126504	4.611e-12	5.047e-07	HLA-DPA1
6	rs1126509	4.611e-12	5.047e-07	HLA-DPA1
6	rs3130980	4.614e-12	1.201e-06	C6orf15
6	rs1126506	5.034e-12	4.972e-07	HLA-DPA1
6	rs7750695	5.11e-12	1.153e-05	AL671883.1
6	rs7770635	5.135e-12	1.011e-05	AL671883.1
6	rs77078553	5.135e-12	1.011e-05	AL671883.1
6	rs9368673	5.135e-12	1.011e-05	AL671883.1
6	rs9368674	5.135e-12	1.011e-05	AL671883.1
6	rs34411813	5.135e-12	1.011e-05	AL671883.1
6	rs9394055	5.135e-12	1.011e-05	AL671883.1
6	rs9368679	5.135e-12	1.011e-05	AL671883.1
6	rs9368680	5.135e-12	1.011e-05	AL671883.1
6	rs9394056	5.135e-12	1.011e-05	AL671883.1
6	rs9357125	5.135e-12	1.011e-05	AL671883.1
6	rs150201065	5.135e-12	1.011e-05	AL671883.1
6	rs66803894	5.135e-12	1.011e-05	AL671883.1
6	rs9366779	5.135e-12	1.011e-05	AL671883.1
6	rs9394057	5.135e-12	1.011e-05	AL671883.1
6	rs68163013	5.135e-12	1.011e-05	AL671883.1
6	rs6930944	5.135e-12	1.011e-05	AL671883.1
6	rs9368678	5.146e-12	1.037e-05	AL671883.1
6	rs7760988	5.149e-12	1.037e-05	AL671883.1
6	rs9468882	5.172e-12	4.016e-07	POU5F1
6	rs3095302	5.176e-12	8.195e-06	CDSN
6	rs3094198	5.251e-12	7.217e-06	PSORS1C1
6	rs3094200	5.251e-12	7.344e-06	CDSN
6	rs9368675	5.301e-12	1.011e-05	AL671883.1
6	rs7761515	5.339e-12	1.019e-05	AL671883.1
6	rs3095316	5.391e-12	1.358e-06	CDSN
6	rs7750269	5.412e-12	1.011e-05	AL671883.1
6	rs9501073	5.749e-12	2.79e-07	AL662844.3
6	rs885950	5.871e-12	1.836e-07	POU5F1
6	rs3129942	6.037e-12	4.035e-06	TSBP1
6	rs887464	6.041e-12	5.383e-07	POU5F1
6	rs7741829	6.234e-12	3.294e-07	AL662844.4
6	rs13409	6.529e-12	1.049e-06	POU5F1
6	rs3130201	6.812e-12	3.212e-06	HLA-DPA2
6	rs1264457	6.928e-12	9.757e-06	HLA-E
6	rs3094205	6.953e-12	1.571e-06	CDSN
6	rs9263875	7.361e-12	1.574e-07	AL662844.3
6	rs3095307	7.379e-12	6.892e-06	CDSN
6	rs3020583	8.455e-12	1.677e-06	HLA-S
6	rs6905862	8.884e-12	6.136e-07	CCHCR1
6	rs130066	1.367e-11	1.162e-06	CCHCR1
6	rs3763311	1.406e-11	7.964e-06	BTNL2
6	rs6917075	1.525e-11	2.023e-07	TSBP1
6	rs9266059	1.95e-11	2.583e-06	HLA-B
6	rs969893	2.239e-11	1.902e-07	RNU6-603P
6	rs10947290	2.299e-11	2.368e-07	HLA-DRB9
6	rs2239888	2.421e-11	2.68e-10	PPP1R18
6	rs6907226	2.591e-11	2.409e-07	RNU6-603P
6	rs387071	2.652e-11	4.808e-08	NOTCH4
6	rs9268347	2.797e-11	2.486e-07	TSBP1
6	rs1265763	2.845e-11	1.898e-07	RNU6-603P
6	rs9268361	2.889e-11	2.016e-07	TSBP1
6	rs9268303	2.936e-11	1.912e-07	TSBP1
6	rs3130554	2.936e-11	1.543e-06	C6orf15
6	rs9268302	2.988e-11	1.944e-07	RNU6-603P
6	rs2076537	3.111e-11	1.5e-07	RNU6-603P
6	rs1076712	3.308e-11	1.967e-07	TSBP1
6	rs9268378	3.323e-11	2.511e-07	TSBP1
6	rs6903816	3.323e-11	2.511e-07	TSBP1
6	rs1967437	3.323e-11	2.511e-07	TSBP1
6	rs2223638	3.348e-11	2.303e-07	RNU6-603P
6	rs6930477	3.348e-11	2.303e-07	RNU6-603P
6	rs9268330	3.348e-11	2.303e-07	TSBP1
6	rs6415129	3.348e-11	2.303e-07	TSBP1
6	rs9268350	3.348e-11	2.303e-07	TSBP1
6	rs9268364	3.348e-11	2.303e-07	TSBP1
6	rs9268367	3.348e-11	2.303e-07	TSBP1
6	rs4389802	3.37e-11	1.289e-07	TSBP1
6	rs6149518	3.383e-11	2.428e-07	RNU6-603P
6	rs9265961	3.393e-11	5.083e-09	HLA-B
6	rs447903	3.457e-11	4.598e-08	NOTCH4
6	rs6907322	3.493e-11	1.75e-07	RNU6-603P
6	rs3117134	3.499e-11	1.5e-07	TSBP1
6	rs9268365	3.611e-11	2.799e-07	TSBP1
6	rs370055	3.642e-11	5.219e-08	NOTCH4
6	rs499691	3.642e-11	5.219e-08	NOTCH4
6	rs6457375	3.721e-11	4.073e-06	AL671883.1
6	rs1633095	3.857e-11	1.943e-09	MICG
6	rs3117122	3.979e-11	1.813e-07	RNU6-603P
6	rs1628628	3.99e-11	3.249e-09	HCG4P8
6	rs910050	4.075e-11	1.448e-07	RNU6-603P
6	rs9268356	4.137e-11	3.024e-07	TSBP1
6	rs3132954	4.595e-11	3.762e-06	TSBP1
6	rs969891	4.652e-11	1.812e-07	RNU6-603P
6	rs3117121	4.652e-11	1.812e-07	RNU6-603P
6	rs3117120	4.652e-11	1.812e-07	RNU6-603P
6	rs2076539	4.652e-11	1.812e-07	RNU6-603P
6	rs3129902	4.652e-11	1.812e-07	TSBP1
6	rs3117136	4.652e-11	1.812e-07	TSBP1
6	rs7383143	4.652e-11	1.812e-07	TSBP1
6	rs9281746	4.652e-11	1.812e-07	TSBP1
6	rs2395147	4.652e-11	1.812e-07	TSBP1
6	rs3117131	4.652e-11	1.812e-07	TSBP1
6	rs9268314	4.729e-11	1.398e-07	TSBP1
6	rs3130553	4.836e-11	1.092e-06	C6orf15
6	rs1474727	5.219e-11	1.401e-07	TSBP1
6	rs34298056	5.492e-11	4.012e-07	RNU6-603P
6	rs1611185	5.653e-11	3.65e-09	HLA-P
6	rs1633097	6.705e-11	1.123e-09	MICG
6	rs9378247	6.804e-11	1.416e-05	AL671883.2
6	rs7744155	6.881e-11	3.085e-07	TSBP1
6	rs1611627	7.292e-11	1.122e-09	HCG4P8
6	rs9268315	7.451e-11	2.105e-07	TSBP1
6	rs2285793	7.565e-11	2.819e-07	AL662860.1
6	rs2524058	7.789e-11	2.283e-06	HLA-B
6	rs9268399	8.173e-11	1.561e-05	TSBP1
6	rs71918165	8.473e-11	3.703e-07	TSBP1
6	rs1419635	8.72e-11	3.261e-06	OR5V1
6	rs143804865	9.105e-11	5.817e-10	AL662797.1
6	rs9368581	9.174e-11	1.521e-05	RNU6-930P
6	rs2223636	1.073e-10	6.011e-06	TSBP1
6	rs2273019	1.18e-10	3.054e-06	TSBP1
6	rs1610705	1.197e-10	4.961e-09	MICG
6	rs1736956	1.197e-10	4.961e-09	MICG
6	rs1077997	1.197e-10	4.961e-09	MICG
6	rs1633105	1.215e-10	4.628e-09	MICG
6	rs1610706	1.255e-10	4.911e-09	MICG
6	rs9404989	1.298e-10	1.846e-06	HCP5
6	rs9279637	1.501e-10	8.998e-06	BTNL2
6	rs3117130	1.503e-10	2.184e-07	TSBP1
6	rs9394040	1.544e-10	8.015e-06	POU5F1
6	rs9357111	1.544e-10	8.015e-06	POU5F1
6	rs9268499	1.637e-10	1.052e-05	BTNL2
6	rs4713467	1.705e-10	1.775e-06	HCP5
6	rs2856821	1.731e-10	6.189e-07	HLA-DPA1
6	rs34140409	1.778e-10	1.083e-05	AL645922.1
6	rs2517552	1.802e-10	1.423e-06	MUC22
6	rs3094206	1.831e-10	7.052e-06	CDSN
6	rs1435796677	1.897e-10	7.949e-06	HLA-DQA1
6	rs1299721066	1.897e-10	7.949e-06	HLA-DQA1
6	rs9393959	1.932e-10	2.095e-06	OR11A1
6	rs7349875	1.932e-10	2.095e-06	OR11A1
6	rs7349876	1.932e-10	2.095e-06	OR11A1
6	rs3828888	1.979e-10	1.678e-06	HCP5
6	rs28383836	2.072e-10	1.335e-05	POU5F1
6	rs9393958	2.089e-10	2.095e-06	OR12D1
6	rs3868542	2.096e-10	9.961e-06	POU5F1
6	rs3871248	2.096e-10	9.961e-06	POU5F1
6	rs9501066	2.096e-10	1.021e-05	POU5F1
6	rs10946990	2.098e-10	2.291e-06	OR11A1
6	rs12207410	2.129e-10	1.712e-06	OR12D1
6	rs12193979	2.158e-10	2.095e-06	OR12D1
6	rs9295805	2.181e-10	2.09e-06	OR11A1
6	rs9391816	2.251e-10	1.046e-05	POU5F1
6	rs3130999	2.262e-10	3.544e-06	CDSN
6	rs3131000	2.262e-10	3.544e-06	CDSN
6	rs28383835	2.32e-10	1.15e-05	POU5F1
6	rs4947305	2.376e-10	1.152e-05	POU5F1
6	rs7770946	2.376e-10	1.152e-05	POU5F1
6	rs3871246	2.376e-10	1.152e-05	POU5F1
6	rs9368657	2.376e-10	1.152e-05	POU5F1
6	rs9368658	2.376e-10	1.152e-05	POU5F1
6	rs9357110	2.376e-10	1.152e-05	POU5F1
6	rs9393960	2.405e-10	2.185e-06	OR11A1
6	rs3871247	2.466e-10	1.162e-05	POU5F1
6	rs1431402	2.469e-10	7.108e-07	HLA-DPA1
6	rs12202249	2.521e-10	1.995e-06	OR12D1
6	rs10807056	2.602e-10	2.758e-06	OR11A1
6	rs3095312	2.639e-10	3.469e-06	CDSN
6	rs3130997	2.639e-10	3.469e-06	CDSN
6	rs7349908	2.667e-10	2.085e-06	OR11A1
6	rs7349863	2.695e-10	2.761e-06	OR11A1
6	rs2844665	2.699e-10	1.012e-06	MUC22
6	rs9380123	2.726e-10	3.009e-06	OR5V1
6	rs2844669	2.74e-10	1.012e-06	MUC22
6	rs9393957	2.769e-10	2.049e-06	OR12D1
6	rs2394608	2.868e-10	3.802e-06	OR5V1
6	rs9348829	2.891e-10	3.335e-06	OR12D2
6	rs2073152	2.891e-10	3.335e-06	OR12D2
6	rs10946988	2.891e-10	3.335e-06	OR5V1
6	rs139299944	2.909e-10	9.576e-08	HLA-DQA1
6	rs3029487	3.039e-10	2.298e-06	OR12D1
6	rs1592404	3.067e-10	3.372e-06	OR12D2
6	rs887466	3.088e-10	1.071e-05	POU5F1
6	rs9391847	3.096e-10	1.419e-08	AL671883.2
6	rs9268325	3.182e-10	3.257e-07	TSBP1
6	rs3132543	3.216e-10	3.55e-06	CDSN
6	rs9405124	3.231e-10	3.333e-06	OR12D2
6	rs1265155	3.508e-10	1.415e-05	POU5F1
6	rs2021408	3.642e-10	7.366e-07	HLA-DPA1
6	rs9265984	3.813e-10	3.305e-06	HLA-B
6	rs9265986	3.813e-10	3.305e-06	HLA-B
6	rs9265987	3.813e-10	3.305e-06	HLA-B
6	rs2853943	3.896e-10	9.857e-06	HLA-B
6	rs6905957	3.942e-10	5.601e-06	LINC00243
6	rs2395105	3.965e-10	1.87e-06	NOTCH4
6	rs1362061	3.985e-10	3.365e-06	OR5V1
6	rs1265095	4.048e-10	3.157e-07	CCHCR1
6	rs9267845	4.302e-10	1.868e-06	NOTCH4
6	rs9501161	4.305e-10	9.564e-06	AL645922.1
6	rs2395106	4.389e-10	1.969e-06	NOTCH4
6	rs9265978	4.788e-10	2.872e-06	HLA-B
6	rs2844672	4.873e-10	1.427e-06	MUC22
6	rs1475961	4.935e-10	1.866e-06	NOTCH4
6	rs3132950	4.935e-10	1.866e-06	NOTCH4
6	rs1475960	4.935e-10	1.866e-06	NOTCH4
6	rs3096691	4.935e-10	1.866e-06	NOTCH4
6	rs2394430	5.628e-10	3.484e-06	MUC22
6	rs2844681	5.681e-10	2.253e-06	MUC22
6	rs17192554	5.846e-10	1.477e-06	HLA-B
6	rs17198923	5.898e-10	1.484e-06	HLA-B
6	rs4713385	6.084e-10	5.367e-06	LINC00243
6	rs2269854	6.65e-10	4.664e-06	LINC00243
6	rs34154598	6.662e-10	5.671e-06	LINC00243
6	rs12665401	7.538e-10	5.594e-08	AL645939.2
6	rs2517553	7.609e-10	1.503e-06	MUC22
6	rs4713389	7.866e-10	5.506e-06	LINC00243
6	rs7751869	7.894e-10	5.41e-06	LINC00243
6	rs4713382	8.275e-10	5.222e-06	LINC00243
6	rs4713383	8.448e-10	5.222e-06	LINC00243
6	rs4587207	8.495e-10	3.921e-06	LINC00243
6	rs9265951	8.557e-10	1.961e-07	HLA-B
6	rs9265953	8.813e-10	1.923e-07	HLA-B
6	rs13191728	8.816e-10	5.203e-06	LINC00243
6	rs9380198	8.831e-10	4.746e-06	LINC00243
6	rs2394429	9.024e-10	2.294e-06	MUC22
6	rs10947101	9.094e-10	5.276e-06	LINC00243
6	rs4947289	9.178e-10	5.41e-06	LINC00243
6	rs9378148	9.204e-10	6.071e-06	LINC00243
6	rs9378109	9.362e-10	4.445e-06	LINC00243
6	rs4713380	9.573e-10	4.881e-06	LINC00243
6	rs13191291	9.586e-10	4.864e-06	LINC00243
6	rs9368640	9.586e-10	4.864e-06	LINC00243
6	rs9394014	9.586e-10	4.864e-06	LINC00243
6	rs12525494	9.586e-10	4.864e-06	LINC00243
6	rs57403748	9.586e-10	4.864e-06	LINC00243
6	rs9295920	9.586e-10	4.864e-06	LINC00243
6	rs9391692	9.586e-10	4.864e-06	LINC00243
6	rs9404973	9.586e-10	4.864e-06	LINC00243
6	rs9391694	9.586e-10	4.864e-06	LINC00243
6	rs9380193	9.586e-10	4.864e-06	LINC00243
6	rs9380195	9.586e-10	4.864e-06	LINC00243
6	rs12528843	9.586e-10	4.864e-06	LINC00243
6	rs9404975	9.586e-10	4.864e-06	LINC00243
6	rs13213098	9.628e-10	4.656e-06	LINC00243
6	rs13198118	1.013e-09	4.195e-06	LINC00243
6	rs9404974	1.068e-09	4.793e-06	LINC00243
6	rs7751130	1.108e-09	6.292e-06	POU5F1
6	rs4947290	1.124e-09	6.108e-06	LINC00243
6	rs9380191	1.167e-09	4.636e-06	LINC00243
6	rs9265977	1.2e-09	2.583e-06	HLA-B
6	rs9295918	1.22e-09	4.17e-06	LINC00243
6	rs13213083	1.22e-09	4.17e-06	LINC00243
6	rs13213469	1.22e-09	4.17e-06	LINC00243
6	rs9380190	1.225e-09	4.508e-06	LINC00243
6	rs3888583	1.23e-09	4.637e-06	LINC00243
6	rs10947098	1.232e-09	7.43e-06	LINC00243
6	rs4248149	1.268e-09	5.311e-06	LINC00243
6	rs4711236	1.304e-09	3.783e-06	LINC00243
6	rs4711237	1.304e-09	3.783e-06	LINC00243
6	rs9295924	1.312e-09	5.895e-06	LINC00243
6	rs4713384	1.312e-09	5.895e-06	LINC00243
6	rs10947102	1.312e-09	5.895e-06	LINC00243
6	rs6901761	1.312e-09	5.895e-06	LINC00243
6	rs13201384	1.312e-09	5.895e-06	LINC00243
6	rs7751827	1.312e-09	5.895e-06	LINC00243
6	rs12661685	1.312e-09	5.895e-06	LINC00243
6	rs2394403	1.356e-09	4.147e-06	LINC00243
6	rs9368644	1.388e-09	5.54e-06	LINC00243
6	rs9277552	1.435e-09	5.065e-07	HLA-DPA2
6	rs9391844	1.507e-09	1.028e-05	HLA-B
6	rs9391845	1.507e-09	1.028e-05	HLA-B
6	rs1655901	1.557e-09	5.483e-10	HLA-A
6	rs9295917	1.576e-09	3.828e-06	LINC00243
6	rs3128927	1.586e-09	8.822e-07	COL11A2P1
6	rs9380189	1.615e-09	1.853e-06	LINC00243
6	rs1042153	1.734e-09	2.806e-06	HLA-DPA1
6	rs2523624	1.91e-09	2.594e-09	HLA-B
6	rs138020512	2.159e-09	5.308e-06	RF00554
6	rs2596521	2.161e-09	3.018e-09	HLA-B
6	rs9391855	2.171e-09	1.316e-05	AGER
6	rs71757905	2.215e-09	8.642e-06	MUC22
6	rs6901776	2.363e-09	6.928e-06	LINC00243
6	rs2507993	2.366e-09	1.695e-05	AL671883.2
6	rs2853916	2.397e-09	9.288e-06	AL671883.1
6	rs9405083	2.447e-09	9.748e-08	AL671883.2
6	rs3893463	2.572e-09	5.859e-09	MICD
6	rs2070600	2.959e-09	1.272e-05	AGER
6	rs12524498	3.286e-09	2.066e-06	HCP5
6	rs9260809	3.318e-09	5.857e-09	HCG9
6	rs28381567	3.992e-09	7.129e-06	LINC00243
6	rs147352225	6.723e-09	1.076e-05	OR2B3
6	rs9260313	7.133e-09	1.391e-10	HLA-A
6	rs9368600	7.217e-09	3.495e-06	OR11A1
6	rs28362342	8.262e-09	1.252e-06	AL662844.3
6	rs28362345	8.262e-09	1.265e-06	AL662844.3
6	rs117405699	8.43e-09	3.105e-06	TRIM26
6	rs12207974	8.72e-09	2.203e-06	HLA-E
6	rs9260060	8.838e-09	4.606e-09	AL671277.1
6	rs9260061	8.838e-09	4.606e-09	AL671277.1
6	rs995185	8.838e-09	1.662e-05	GABBR1
6	rs4711220	9.014e-09	7.588e-06	HLA-E
6	rs9260026	9.235e-09	4.099e-09	AL671277.1
6	rs9260041	9.235e-09	4.099e-09	AL671277.1
6	rs402850	9.235e-09	4.099e-09	AL671277.1
6	rs78179089	9.235e-09	4.099e-09	AL671277.1
6	rs117369084	9.324e-09	1.513e-05	ATF6B
6	rs3128930	9.601e-09	2.753e-06	COL11A2P1
6	rs7764668	1.073e-08	1.26e-06	AL662844.4
6	rs118090768	1.09e-08	1.55e-05	AL662884.2
6	rs9461613	1.095e-08	3.494e-06	SUCLA2P1
6	rs2021719	1.123e-08	5.593e-06	RANP1
6	rs3132482	1.182e-08	1.431e-05	HLA-B
6	rs9295898	1.219e-08	5.849e-06	RANP1
6	rs2021720	1.219e-08	5.849e-06	RANP1
6	rs6921669	1.219e-08	5.849e-06	RANP1
6	rs2105960	1.224e-08	5.932e-06	HLA-E
6	rs2078675	1.228e-08	2.605e-06	HLA-E
6	rs3823363	1.232e-08	5.422e-11	HCG9
6	rs9263871	1.34e-08	7.976e-07	AL662844.3
6	rs12174870	1.373e-08	5.338e-06	SUCLA2P1
6	rs9295896	1.373e-08	5.338e-06	SUCLA2P1
6	rs35600573	1.373e-08	5.338e-06	SUCLA2P1
6	rs6929424	1.373e-08	5.338e-06	SUCLA2P1
6	rs7761210	1.438e-08	5.088e-06	SUCLA2P1
6	rs3130213	1.473e-08	8.733e-06	COL11A2P1
6	rs13202930	1.616e-08	4.964e-06	SUCLA2P1
6	rs2523793	1.726e-08	1.346e-08	HLA-G
6	rs4590261	1.806e-08	1.024e-06	AL662844.1
6	rs2735019	1.827e-08	1.335e-08	HLA-G
6	rs2517890	1.858e-08	1.346e-08	HLA-G
6	rs4455663	1.907e-08	1.112e-06	AL662844.1
6	rs9260260	2.024e-08	1.795e-10	AL671277.1
6	rs9260014	2.091e-08	1.122e-10	AL671277.1
6	rs3884198	2.091e-08	1.122e-10	AL671277.1
6	rs453325	2.091e-08	1.122e-10	AL671277.1
6	rs9280783	2.091e-08	1.122e-10	AL671277.1
6	rs451318	2.091e-08	1.122e-10	AL671277.1
6	rs9260025	2.091e-08	1.122e-10	AL671277.1
6	rs9260030	2.091e-08	1.122e-10	AL671277.1
6	rs9260031	2.091e-08	1.122e-10	AL671277.1
6	rs9260066	2.091e-08	1.122e-10	AL671277.1
6	rs9260068	2.091e-08	1.122e-10	AL671277.1
6	rs9260388	2.137e-08	6.609e-11	HLA-A
6	rs9260034	2.172e-08	1.061e-10	AL671277.1
6	rs9260035	2.172e-08	1.061e-10	AL671277.1
6	rs2394252	2.187e-08	7.601e-11	HCG9
6	rs9260048	2.221e-08	1.625e-10	AL671277.1
6	rs9265912	2.221e-08	1.102e-06	HLA-B
6	rs9267352	2.271e-08	5.474e-06	MICB
6	rs440674	2.294e-08	1.166e-10	AL671277.1
6	rs1634774	2.354e-08	2.33e-08	HLA-B
6	rs9260257	2.571e-08	2.188e-10	AL671277.1
6	rs6908934	2.613e-08	5.147e-06	MICB
6	rs6909425	2.747e-08	1.429e-05	MUC21
6	rs6910297	2.898e-08	6.214e-06	MICB
6	rs9267431	3.087e-08	4.893e-06	AL663061.1
6	rs9267429	3.087e-08	4.893e-06	MICB
6	rs9260044	3.118e-08	2.122e-10	AL671277.1
6	rs60478274	3.149e-08	2.246e-09	HLA-W
6	rs9391763	3.496e-08	1.329e-05	SUCLA2P1
6	rs2394250	3.653e-08	7.38e-10	HCG9
6	rs9380260	3.664e-08	7.707e-06	MICB
6	rs9277381	4.265e-08	7.93e-06	HLA-DPA1
6	rs9267378	4.298e-08	1.32e-05	MICB
6	rs12526246	4.426e-08	5.973e-07	HLA-B
6	rs3128965	4.794e-08	7.716e-06	HLA-DPA2
6	rs3128966	4.839e-08	6.573e-06	HLA-DPA2
6	rs9277379	4.868e-08	6.573e-06	HLA-DPA1
6	rs2517689	5.003e-08	2.332e-09	HLA-W
14	rs2160215	4.445e-20	8.985e-09	TSHR
14	rs1023586	4.445e-20	8.985e-09	TSHR
14	rs4903961	5.438e-20	1.325e-08	RPL17P3
14	rs28414437	1.053e-19	1.248e-08	TSHR
14	rs4903962	6.084e-19	1.629e-08	RPL17P3
14	rs2268459	6.613e-19	4.758e-08	RPL17P3
14	rs2284730	7.591e-19	1.419e-08	AC007262.1
14	rs12323356	1.054e-18	1.715e-08	RPL17P3
14	rs55957493	1.58e-18	2.069e-08	AC007262.1
14	rs55960644	1.584e-18	2.069e-08	AC007262.1
14	rs11159479	1.683e-18	2.976e-08	TSHR
14	rs56389234	1.683e-18	2.976e-08	TSHR
14	rs60462373	2.871e-18	3.092e-08	AC007262.1
14	rs4903964	2.879e-18	1.813e-08	AC007262.1
14	rs7152373	3.17e-18	1.825e-08	AC007262.1
14	rs17111365	3.804e-18	5.962e-09	AC007262.1
14	rs6574617	4.087e-18	3.458e-08	TSHR
14	rs10145099	4.828e-18	3.924e-08	TSHR
14	rs58417382	5.623e-18	4.59e-08	AC007262.1
14	rs58266067	5.623e-18	4.59e-08	AC007262.1
14	rs58241131	5.781e-18	4.59e-08	AC007262.1
14	rs2371463	6.641e-18	4.222e-08	TSHR
14	rs3783943	9.034e-18	1.994e-09	AC007262.1
14	rs724170	2.069e-17	5.364e-08	TSHR
14	rs228127	9.84e-15	3.161e-06	CEP128
14	rs7154132	1.048e-14	6.051e-06	CEP128
14	rs35176982	1.399e-14	4.794e-06	CEP128
14	rs1025253	1.463e-14	4.247e-06	CEP128
14	rs8022411	1.463e-14	4.247e-06	CEP128
14	rs7153979	1.497e-14	5.146e-06	CEP128
14	rs4903948	1.498e-14	4.042e-06	CEP128
14	rs2217176	1.511e-14	2.633e-06	CEP128
14	rs2556601	1.68e-14	3.392e-06	CEP128
14	rs8021137	1.758e-14	4.104e-06	CEP128
14	rs759916	1.912e-14	4.592e-06	CEP128
14	rs2371457	1.919e-14	5.887e-06	CEP128
14	rs172920	1.955e-14	2.432e-06	CEP128
14	rs11385061	2.075e-14	4.641e-06	CEP128
14	rs8005883	2.242e-14	4.322e-06	CEP128
14	rs228121	2.624e-14	5.555e-06	CEP128
14	rs2556605	2.691e-14	1.042e-06	CEP128
14	rs7154373	3.598e-14	3.618e-06	CEP128
14	rs7148368	4.045e-14	7.552e-06	AC022404.1
14	rs7150858	4.088e-14	7.552e-06	CEP128
14	rs228120	4.959e-14	5.817e-06	CEP128
14	rs2044738	5.813e-14	8.892e-06	AC022404.1
14	rs2217174	7.241e-14	4.095e-06	CEP128
14	rs61979449	1.074e-13	7.557e-06	CEP128
14	rs228118	1.103e-13	1.017e-06	CEP128
14	rs12434564	1.104e-13	8.544e-06	AC022404.1
14	rs17613911	1.12e-13	5.341e-06	CEP128
14	rs10546120	1.12e-13	5.341e-06	CEP128
14	rs71416852	1.12e-13	6.679e-06	AC022404.1
14	rs12880014	1.138e-13	5.409e-06	CEP128
14	rs228111	1.143e-13	6.434e-06	CEP128
14	rs35540104	1.207e-13	8.031e-07	CEP128
14	rs728444	1.208e-13	3.028e-06	CEP128
14	rs8003784	1.221e-13	5.837e-06	CEP128
14	rs12432357	1.221e-13	5.837e-06	CEP128
14	rs8006507	1.237e-13	5.87e-06	CEP128
14	rs17542615	1.346e-13	5.9e-06	CEP128
14	rs1016507	1.355e-13	8.221e-07	CEP128
14	rs7143407	1.383e-13	4.991e-06	CEP128
14	rs1458993	1.463e-13	7.287e-06	CEP128
14	rs8006864	1.47e-13	6.649e-06	AC022404.1
14	rs7141130	1.47e-13	6.649e-06	CEP128
14	rs11623023	1.491e-13	6.816e-06	CEP128
14	rs12431821	1.531e-13	6.968e-06	CEP128
14	rs61979451	1.531e-13	6.968e-06	CEP128
14	rs61979448	1.55e-13	6.968e-06	CEP128
14	rs12886388	1.55e-13	6.968e-06	CEP128
14	rs2371416	1.55e-13	6.968e-06	CEP128
14	rs61979452	1.55e-13	6.968e-06	CEP128
14	rs7148618	1.563e-13	6.601e-06	CEP128
14	rs12888082	1.801e-13	9.867e-06	CEP128
14	rs12896065	2.985e-13	4.896e-06	CEP128
14	rs1992973	3.143e-13	4.898e-06	CEP128
14	rs2596118	3.143e-13	4.898e-06	CEP128
14	rs4523859	4.541e-13	5.005e-06	CEP128
14	rs17614081	4.877e-13	5.277e-06	CEP128
14	rs7141434	6.011e-13	1.625e-05	CEP128
14	rs12891585	1.134e-12	3.903e-06	CEP128

## Sheet: 工作表1  (1)
		Discovery	Discovery	Replication
geneID	CHR	SNP	UNADJ	UNADJ		Discovery	<5*10-8	1. with gene ame?
CTLA4	2	rs231779	1.831e-14	8.529e-06		Replication	<1.75*10-5	2. Chr Small to Big
CTLA4	2	rs1427680	2.072e-14	8.15e-06				3. Di UNADJ Small to Big
CTLA4	2	rs736611	2.186e-14	9.962e-06				4. Re UNADJ Small to Big
CTLA4	2	rs11571315	2.188e-14	9.432e-06
CTLA4	2	rs231723	3.236e-14	9.247e-06
CTLA4	2	rs3087243	8.749e-13	6.086e-07
CTLA4	2	rs11571316	1.148e-12	5.653e-07
CTLA4	2	rs11571302	6.59e-09	1.503e-05
CTLA4	2	rs7565213	8.52e-09	1.448e-05
HCP5	6	rs117116160	7.726e-33	1.227e-12
HCP5	6	rs117884751	2.558e-32	1.762e-12
HCP5	6	rs3763287	5.249e-25	1.413e-11
HCP5	6	rs114202986	4.604e-24	3.452e-10
HCP5	6	rs3763288	5.038e-24	3.875e-10
HCP5	6	rs2596466	5.155e-23	3.019e-11
HCP5	6	rs2516471	1.107e-22	2.606e-11
HCP5	6	rs2263323	1.228e-22	3.435e-11
HCP5	6	rs9380254	1.815e-22	3.255e-11
HCP5	6	rs9357133	2.101e-22	2.707e-11
HCP5	6	rs2848709	5.637e-22	3.513e-09
HCP5	6	rs2524279	7.649e-22	1.257e-10
HLA-B	6	rs141618471	1.009e-31	2.308e-13
HLA-B	6	rs9378228	1.704e-31	4.476e-12
HLA-B	6	rs12524692	7.741e-29	1.761e-12
HLA-B	6	rs72860306	5.838e-28	2.162e-11
HLA-B	6	rs9357121	9.242e-22	4.977e-12
HLA-B	6	rs9366775	1.429e-21	5.838e-12
HLA-B	6	rs4298345	1.638e-21	6.464e-12
HLA-B	6	rs56356836	2.388e-21	4.535e-12
HLA-B	6	rs9405016	2.388e-21	4.535e-12
HLA-B	6	rs12529015	2.388e-21	4.535e-12
HLA-B	6	rs9368669	2.388e-21	4.535e-12
HLA-B	6	rs9391714	2.901e-21	4.408e-12
HLA-B	6	rs9380234	5.626e-21	3.448e-12
POU5F1	6	rs117588763	2.882e-30	3.548e-11
POU5F1	6	rs9357112	2.882e-30	3.548e-11
POU5F1	6	rs9357114	2.882e-30	3.548e-11
POU5F1	6	rs9348855	2.882e-30	3.548e-11
POU5F1	6	rs4713439	3.473e-30	4.104e-11
POU5F1	6	rs9391817	1.643e-28	1.182e-11
POU5F1	6	rs1265160	7.056e-21	5.584e-10
POU5F1	6	rs1265163	1.989e-20	5.252e-10
CCHCR1	6	rs28652698	3.568e-28	2.057e-11
CCHCR1	6	rs28383832	1.703e-20	6.47e-10
CCHCR1	6	rs1265082	1.835e-20	4.211e-10
CCHCR1	6	rs1265113	1.835e-20	4.211e-10
CCHCR1	6	rs1265090	2.125e-20	1.428e-10
CCHCR1	6	rs1265107	2.399e-20	4.296e-10
CCHCR1	6	rs1265110	2.482e-20	4.296e-10
HLA-DRA	6	rs9469112	3.301e-26	1.714e-10
HLA-DRA	6	rs16822660	1.358e-22	1.942e-08
HLA-DRA	6	rs9469113	2.495e-21	1.551e-07
HLA-DRB9	6	rs7770920	3.508e-24	1.697e-10
HLA-DRB9	6	rs6457596	3.508e-24	1.697e-10
HLA-DRB9	6	rs111573974	3.508e-24	1.697e-10
HLA-DRB9	6	rs6924760	3.523e-24	1.714e-10
HLA-DRB9	6	rs9286789	3.523e-24	1.714e-10
HLA-DRB9	6	rs17203039	3.523e-24	1.714e-10
HLA-DRB9	6	rs11759730	3.523e-24	1.714e-10
HLA-DRB9	6	rs9461755	3.523e-24	1.714e-10
HLA-DRB9	6	rs9461756	3.523e-24	1.714e-10
HLA-DRB9	6	rs2071805	3.523e-24	1.714e-10
HLA-DRB9	6	rs61550563	3.523e-24	1.714e-10
HLA-DRB9	6	rs17209754	3.523e-24	1.714e-10
HLA-DRB9	6	rs17209768	3.523e-24	1.714e-10
HLA-DRB9	6	rs17203430	3.523e-24	1.714e-10
HLA-DRB9	6	rs17203444	3.523e-24	1.714e-10
HLA-DRB9	6	rs17209803	3.523e-24	1.714e-10
HLA-DRB9	6	rs17203458	3.523e-24	1.714e-10
HLA-DRB9	6	rs148948227	3.559e-24	1.598e-10
HLA-DRB9	6	rs11753780	3.559e-24	1.626e-10
HLA-DRB9	6	rs9469129	3.693e-24	1.691e-10
HLA-DRB9	6	rs9469130	3.693e-24	1.691e-10
HLA-DRB9	6	rs73729294	6.368e-24	2.465e-10
HLA-DRB9	6	rs9469120	6.384e-24	2.717e-10
HLA-DRB9	6	rs76187645	1.904e-22	9.759e-09
HLA-DRB9	6	rs9501639	2.036e-22	1.009e-08
HLA-DRB9	6	rs56083136	2.686e-21	1.711e-07
HLA-DRB9	6	rs9501640	2.686e-21	1.711e-07
HLA-DRB9	6	rs35286068	4.187e-21	2.184e-07
HLA-S	6	rs12524487	1.091e-23	7.226e-10
ABCF1	6	rs143982339	1.661e-24	1.673e-11
ABCF1	6	rs9380181	2.976e-22	5.013e-11
AL645933.2	6	rs9394070	8.181e-24	1.613e-10
AL662844.1	6	rs10947158	1.871e-29	1.214e-10
AL662844.1	6	rs3130949	1.4e-22	5.382e-10
AL662844.1	6	rs2394886	1.463e-22	2.132e-09
AL662844.3	6	rs28483421	3.941e-30	3.112e-11
AL662844.3	6	rs4122190	6.518e-30	2.814e-11
AL662844.3	6	rs117333063	8.255e-30	2.652e-11
AL662844.3	6	rs10807081	5.416e-20	6.157e-11
AL662844.4	6	rs9378226	4.054e-30	4.71e-11
AL663061.1	6	rs9348874	8.495e-24	2.458e-09
AL671883.2	6	rs142459005	5.976e-32	2.703e-12
AL671883.2	6	rs9391724	1.438e-20	6.326e-10
AL671883.2	6	rs9391848	3.382e-20	6.511e-11
ATAT1	6	rs143128695	2.976e-22	5.013e-11
C6orf15	6	rs2233972	4.701e-21	8.37e-09
CDSN	6	rs3819683	1.39e-26	4.828e-09
DHX16	6	rs151195028	5.74e-22	8.826e-12
FLOT1	6	rs9380182	7.951e-24	1.158e-12
HCG27	6	rs3132506	1.09e-22	2.874e-10
LINC00243	6	rs9391634	7.584e-26	1.654e-11
LST1	6	rs9357135	1.466e-25	1.962e-08
MUC22	6	rs9357105	2.342e-31	4.313e-12
MUCL3	6	rs117295261	2.295e-23	3.29e-09
POU5F1	6	rs6913070	2.105e-30	2.248e-11
PPP1R10	6	rs9348841	2.184e-24	1.854e-11
TSHR	14	rs2160215	4.445e-20	8.985e-09
TSHR	14	rs1023586	4.445e-20	8.985e-09
TSHR	14	rs28414437	1.053e-19	1.248e-08
TSHR	14	rs11159479	1.683e-18	2.976e-08
TSHR	14	rs56389234	1.683e-18	2.976e-08
TSHR	14	rs6574617	4.087e-18	3.458e-08
TSHR	14	rs10145099	4.828e-18	3.924e-08
TSHR	14	rs2371463	6.641e-18	4.222e-08
TSHR	14	rs724170	2.069e-17	5.364e-08
RPL17P3	14	rs4903961	5.438e-20	1.325e-08
RPL17P3	14	rs4903962	6.084e-19	1.629e-08
RPL17P3	14	rs2268459	6.613e-19	4.758e-08
RPL17P3	14	rs12323356	1.054e-18	1.715e-08
CEP128	14	rs228127	9.84e-15	3.161e-06
CEP128	14	rs7154132	1.048e-14	6.051e-06
CEP128	14	rs35176982	1.399e-14	4.794e-06
CEP128	14	rs1025253	1.463e-14	4.247e-06
CEP128	14	rs8022411	1.463e-14	4.247e-06
CEP128	14	rs7153979	1.497e-14	5.146e-06
CEP128	14	rs4903948	1.498e-14	4.042e-06
CEP128	14	rs2217176	1.511e-14	2.633e-06
CEP128	14	rs2556601	1.68e-14	3.392e-06
CEP128	14	rs8021137	1.758e-14	4.104e-06
CEP128	14	rs759916	1.912e-14	4.592e-06
CEP128	14	rs2371457	1.919e-14	5.887e-06
CEP128	14	rs172920	1.955e-14	2.432e-06
CEP128	14	rs11385061	2.075e-14	4.641e-06
CEP128	14	rs8005883	2.242e-14	4.322e-06
CEP128	14	rs228121	2.624e-14	5.555e-06
CEP128	14	rs2556605	2.691e-14	1.042e-06
CEP128	14	rs7154373	3.598e-14	3.618e-06
CEP128	14	rs7150858	4.088e-14	7.552e-06
CEP128	14	rs228120	4.959e-14	5.817e-06
CEP128	14	rs2217174	7.241e-14	4.095e-06
CEP128	14	rs61979449	1.074e-13	7.557e-06
CEP128	14	rs228118	1.103e-13	1.017e-06
CEP128	14	rs17613911	1.12e-13	5.341e-06
CEP128	14	rs10546120	1.12e-13	5.341e-06
CEP128	14	rs12880014	1.138e-13	5.409e-06
CEP128	14	rs228111	1.143e-13	6.434e-06
CEP128	14	rs35540104	1.207e-13	8.031e-07
CEP128	14	rs728444	1.208e-13	3.028e-06
CEP128	14	rs8003784	1.221e-13	5.837e-06
CEP128	14	rs12432357	1.221e-13	5.837e-06
CEP128	14	rs8006507	1.237e-13	5.87e-06
CEP128	14	rs17542615	1.346e-13	5.9e-06
CEP128	14	rs1016507	1.355e-13	8.221e-07
CEP128	14	rs7143407	1.383e-13	4.991e-06
CEP128	14	rs1458993	1.463e-13	7.287e-06
CEP128	14	rs7141130	1.47e-13	6.649e-06
CEP128	14	rs11623023	1.491e-13	6.816e-06
CEP128	14	rs12431821	1.531e-13	6.968e-06
CEP128	14	rs61979451	1.531e-13	6.968e-06
CEP128	14	rs61979448	1.55e-13	6.968e-06
CEP128	14	rs12886388	1.55e-13	6.968e-06
CEP128	14	rs2371416	1.55e-13	6.968e-06
CEP128	14	rs61979452	1.55e-13	6.968e-06
CEP128	14	rs7148618	1.563e-13	6.601e-06
CEP128	14	rs12888082	1.801e-13	9.867e-06
CEP128	14	rs12896065	2.985e-13	4.896e-06
CEP128	14	rs1992973	3.143e-13	4.898e-06
CEP128	14	rs2596118	3.143e-13	4.898e-06
CEP128	14	rs4523859	4.541e-13	5.005e-06
CEP128	14	rs17614081	4.877e-13	5.277e-06
CEP128	14	rs7141434	6.011e-13	1.625e-05
CEP128	14	rs12891585	1.134e-12	3.903e-06
AC007262.1	14	rs2284730	7.591e-19	1.419e-08
AC007262.1	14	rs55957493	1.58e-18	2.069e-08
AC007262.1	14	rs55960644	1.584e-18	2.069e-08
AC007262.1	14	rs60462373	2.871e-18	3.092e-08
AC007262.1	14	rs4903964	2.879e-18	1.813e-08
AC007262.1	14	rs7152373	3.17e-18	1.825e-08
AC007262.1	14	rs17111365	3.804e-18	5.962e-09
AC007262.1	14	rs58417382	5.623e-18	4.59e-08
AC007262.1	14	rs58266067	5.623e-18	4.59e-08
AC007262.1	14	rs58241131	5.781e-18	4.59e-08
AC007262.1	14	rs3783943	9.034e-18	1.994e-09
AC022404.1	14	rs7148368	4.045e-14	7.552e-06
AC022404.1	14	rs2044738	5.813e-14	8.892e-06
AC022404.1	14	rs12434564	1.104e-13	8.544e-06
AC022404.1	14	rs71416852	1.12e-13	6.679e-06
AC022404.1	14	rs8006864	1.47e-13	6.649e-06

## Sheet: 工作表1  (2)
			Discovery	Replication
CHR	SNPs	geneID	UNADJ	UNADJ		Discovery	<5*10-14	1. with gene ame?
2	rs231779	CTLA4	1.831e-14	8.529e-06		Replication	<1.75*10-5	2. Chr Small to Bog
	rs1427680		2.072e-14	8.15e-06				3. Di UNADJ Small to Bog
	rs736611		2.186e-14	9.962e-06				4. Re UNADJ Small to Bog
	rs11571315		2.188e-14	9.432e-06
	rs231723		3.236e-14	9.247e-06
6	rs117116160	HCP5	7.726e-33	1.227e-12
	rs117884751		2.558e-32	1.762e-12
	rs3763287		5.249e-25	1.413e-11
	rs114202986		4.604e-24	3.452e-10
	rs3763288		5.038e-24	3.875e-10
6	rs141618471	HLA-B	1.009e-31	2.308e-13
	rs9378228		1.704e-31	4.476e-12
	rs12524692		7.741e-29	1.761e-12
	rs72860306		5.838e-28	2.162e-11
	rs9357121		9.242e-22	4.977e-12
6	rs117588763	POU5F1	2.882e-30	3.548e-11
	rs9357112		2.882e-30	3.548e-11
	rs9357114		2.882e-30	3.548e-11
	rs9348855		2.882e-30	3.548e-11
	rs4713439		3.473e-30	4.104e-11
6	rs28652698	CCHCR1	3.568e-28	2.057e-11
	rs28383832		1.703e-20	6.47e-10
	rs1265082		1.835e-20	4.211e-10
	rs1265113		1.835e-20	4.211e-10
6	rs9469112	HLA-DRA	3.301e-26	1.714e-10
	rs16822660		1.358e-22	1.942e-08
	rs9469113		2.495e-21	1.551e-07
6	rs7770920	HLA-DRB9	3.508e-24	1.697e-10
	rs6457596		3.508e-24	1.697e-10
	rs111573974		3.508e-24	1.697e-10
	rs6924760		3.523e-24	1.714e-10
	rs9286789		3.523e-24	1.714e-10
14	rs2160215	TSHR	4.445e-20	8.985e-09
	rs1023586		4.445e-20	8.985e-09
	rs28414437		1.053e-19	1.248e-08
	rs11159479		1.683e-18	2.976e-08
	rs56389234		1.683e-18	2.976e-08
14	rs4903961	RPL17P3	5.438e-20	1.325e-08
	rs4903962		6.084e-19	1.629e-08
	rs2268459		6.613e-19	4.758e-08
	rs12323356		1.054e-18	1.715e-08
14	rs228127	CEP128	9.84e-15	3.161e-06
	rs7154132		1.048e-14	6.051e-06
	rs35176982		1.399e-14	4.794e-06
	rs1025253		1.463e-14	4.247e-06
	rs8022411		1.463e-14	4.247e-06

## Sheet: Table 2 for fig 2
	CHR		SNP		Gene
	2		rs231779		CTLA4
			rs231723
	6		rs117116160		HCP5
			rs3763288
			rs141618471		HLA-B
			rs9357121
			rs7770920		HLA-DRB9
			rs9286789
	14		rs2160215		TSHR
			rs56389234
			rs228127		CEP128
			rs8022411

## Sheet: Table 2-0
Table 2. Lead SNPs from the discovery- and replication-analysis
	CHR		SNP		A1/A2		p value (GWAS results)		p value (Replication)		Gene		Function of gene		Involvement in disease
	2		rs231779		C/T		1.831e-14		8.529e-06		CTLA4		Inhibitory receptor acting as a major negative regulator of T-cell responses. (1, 2)		Systemic lupus erythematosus (SLE) (3)
			rs1427680		G/A		2.072e-14		8.15e-06						Diabetes mellitus, insulin-dependent, 12 (IDDM12) (4)			Inhibitory receptor acting as a major negative regulator of T-cell responses. The affinity of CTLA4 for its natural B7 family ligands, CD80 and CD86, is considerably stronger than the affinity of their cognate stimulatory coreceptor CD28.			https://www.uniprot.org/uniprot/P16410#function					https://www.genecards.org/cgi-bin/carddisp.pl?gene=CTLA4#function
			rs736611		C/T		2.186e-14		9.962e-06						Celiac disease 3 (CELIAC3) (5)			(1). "CTLA-4 is a second receptor for the B cell activation antigen B7." Linsley P.S., Brady W., Urnes M., Griosmaire L.S., Damle N.K., Ledbetter J.A. J. Exp. Med. 174:561-569(1991)			(2). "A molecular perspective of CTLA-4 function." Teft W.A., Kirchhof M.G., Madrenas J. Annu. Rev. Immunol. 24:65-97(2006)
			rs11571315		T/C		2.188e-14		9.432e-06						Autoimmune lymphoproliferative syndrome 5 (ALPS5) (6)			(3)."CTLA-4 polymorphisms and systemic lupus erythematosus (SLE): a meta-analysis." Lee Y.H., Harley J.B., Nath S.K. Hum. Genet. 116:361-367(2005)			(4). "Insulin-dependent diabetes mellitus (IDDM) is associated with CTLA4 polymorphisms in multiple ethnic groups." Marron M.P., Raffel L.J., Garchon H.-J., Jacob C.O., Serrano-Rios M., Martinez Larrad M.T., Teng W.-P., Park Y., Zhang Z.-X., Goldstein D.R., Tao Y.-W., Beaurain G., Bach J.-F., Huang H.-S., Luo D.-F., Zeidler A., Rotter J.I., Yang M.C.K. She J.-X. Hum. Mol. Genet. 6:1275-1282(1997)
			rs231723		A/G		3.236e-14		9.247e-06									(5). "A common CTLA4 haplotype associated with coeliac disease." Hunt K.A., McGovern D.P.B., Kumar P.J., Ghosh S., Travis S.P.L., Walters J.R.F., Jewell D.P., Playford R.J., van Heel D.A. Eur. J. Hum. Genet. 13:440-444(2005)			(6). "Autosomal dominant immune dysregulation syndrome in humans with CTLA4 mutations." Schubert D., Bode C., Kenefeck R., Hou T.Z., Wing J.B., Kennedy A., Bulashevska A., Petersen B.S., Schaeffer A.A., Gruening B.A., Unger S., Frede N., Baumann U., Witte T., Schmidt R.E., Dueckers G., Niehues T., Seneviratne S. Grimbacher B. Nat. Med. 20:1410-1416(2014)
	6		rs117116160		C/T		7.726e-33		1.227e-12		HCP5		HCP5 (HLA Complex P5) is an RNA Gene, and is affiliated with the lncRNA class.		Acquired Immunodeficiency Syndrome (7)
			rs117884751		T/A		2.558e-32		1.762e-12						Thyroid Gland Follicular Carcinoma (8)
			rs3763287		C/A		5.249e-25		1.413e-11									HCP5 (HLA Complex P5) is an RNA Gene, and is affiliated with the lncRNA class. Diseases associated with HCP5 include Acquired Immunodeficiency Syndrome and Thyroid Gland Follicular Carcinoma			https://www.uniprot.org/uniprot/Q6MZN7					https://www.genecards.org/cgi-bin/carddisp.pl?gene=HCP5#function
			rs114202986		T/A		4.604e-24		3.452e-10									(7). Novel association of five HLA alleles with HIV-1 progression in Spanish long-term non progressor patients. Ramirez de Arellano E, Diez-Fuertes F, Aguilar F, (and 16 more) ; PLoS One (2019)
			rs3763288		G/A		5.038e-24		3.875e-10									(8). Correction: LncRNA HCP5A promotes follicular thyroid carcinoma progression via miRNAs sponge. Liang L, Xu J, Wang M, Xu G, Zhang N, Wang G, Zhao Y. Cell Death Dis. 2019 Sep 3;10(9):639
			rs141618471		A/G		1.009e-31		2.308e-13		HLA-B		HLA-B (Major Histocompatibility Complex, Class I, B) is a Protein Coding gene.		Stevens-Johnson syndrome (SJS)(10)
			rs9378228		G/T		1.704e-31		4.476e-12						Spondyloarthropathy 1 (SPDA1)(11)			HLA-B (Major Histocompatibility Complex, Class I, B) is a Protein Coding gene. Diseases associated with HLA-B include Severe Cutaneous Adverse Reaction and Spondyloarthropathy 1. Among its related pathways are Actin Nucleation by ARP-WASP Complex and Allograft rejection. Gene Ontology (GO) annotations related to this gene include signaling receptor binding and peptide antigen binding. An importan…			https://www.uniprot.org/uniprot/P01889					https://www.genecards.org/cgi-bin/carddisp.pl?gene=HLA-B#function
			rs12524692		T/A		7.741e-29		1.761e-12									(10)."Medical genetics: a marker for Stevens-Johnson syndrome."Chung W.-H., Hung S.-I., Hong H.-S., Hsih M.-S., Yang L.-C., Ho H.-C., Wu J.-Y., Chen Y.-T.Nature 428:486-486(2004)
			rs72860306		C/T		5.838e-28		2.162e-11									(11)."HLA-B27 in the Greek Cypriot population: distribution of subtypes in patients with ankylosing spondylitis and other HLA-B27-related diseases. The possible protective role of B*2707."Varnavidou-Nicolaidou A., Karpasitou K., Georgiou D., Stylianou G., Kokkofitou A., Michalis C., Constantina C., Gregoriadou C., Kyriakides G.Hum. Immunol. 65:1451-1454(2004)
			rs9357121		T/G		9.242e-22		4.977e-12
			rs117588763		C/T		2.882e-30		3.548e-11		POU5F1		Critical for early embryogenesis and for embryonic stem cell pluripotency.(12)		Embryonal Carcinoma(13)
			rs9357112		A/G		2.882e-30		3.548e-11						Teratoma(14)			Transcription factor that binds to the octamer motif (5'-ATTTGCAT-3'). Forms a trimeric complex with SOX2 or SOX15 on DNA and controls the expression of a number of genes involved in embryonic development such as YES1, FGF4, UTF1 and ZFP206. Critical for early embryogenesis and for embryonic stem cell pluripotency.			https://www.uniprot.org/uniprot/Q01860#expression					https://www.genecards.org/cgi-bin/carddisp.pl?gene=POU5F1#function
			rs9357114		T/G		2.882e-30		3.548e-11									(12)."Induction of pluripotent stem cells from adult human fibroblasts by defined factors."Takahashi K., Tanabe K., Ohnuki M., Narita M., Ichisaka T., Tomoda K., Yamanaka S.Cell 131:861-872(2007)
			rs9348855		A/C		2.882e-30		3.548e-11									(13).Alpha-fetoprotein-producing non-germ cell tumours of the female genital tract.M El-Bahrawy.Eur J Cancer 46(8):1317-22(2010)
			rs4713439		A/G		3.473e-30		4.104e-11									(14).Generation of induced pluripotent stem cells from newborn marmoset skin fibroblasts.Yuehong Wu, Yong Zhang, Anuja Mishra, Suzette D Tardif, Peter J Hornsby.Stem Cell Res 4(3):180-8(2010)
			rs28652698		G/A		3.568e-28		2.057e-11		CCHCR1		Critical for early embryogenesis and for embryonic stem cell pluripotency.		Psoriasis(15)
			rs28383832		(-/CGCC)		1.703e-20		6.47e-10						Psoriasis 1 (PSORS1)(16)			May be a regulator of keratinocyte proliferation or differentiation.			https://www.uniprot.org/uniprot/Q8TD31#function					https://www.genecards.org/cgi-bin/carddisp.pl?gene=CCHCR1#function
			rs1265082		G/A		1.835e-20		4.211e-10									(15).The effects of acupuncture for patients with psoriasis: Study protocol for a randomized controlled trial.Juan Du, Jiming Tao, Ming Xu, Runnan Wang, Lanmei Lin, Xinyun Huang, Qunyi Li, Xiaonian Lu.Medicine (Baltimore) 28;100(2021)
			rs1265113		C/G		1.835e-20		4.211e-10									(16).Goldgar,Genki Hayashi, Emily H Olfson, Bing-Jian Feng, Clive R Pullinger, John P Kane, Carol A Wise, Raphaela Goldbach-Mansky, Michelle A Lowes, Lynette Peddle, Vinod Chandran, Wilson Liao, Proton Rahman, Gerald G Krueger, Dafna Gladman, James T Elder, Alan Menter, Anne M Bowcock.Am J Hum Genet.4;90(5):796-808(2012)
			rs9469112		C/T		3.301e-26		1.714e-10		HLA-DRA		HLA-DRA (Major Histocompatibility Complex, Class II, DR Alpha) is a Protein Coding gene		Graham-Little-Piccardi-Lassueur Syndrome(17)
			rs16822660		T/C		1.358e-22		1.942e-08						Penicillin Allergy(18)			An alpha chain of antigen-presenting major histocompatibility complex class II (MHCII) molecule. In complex with the beta chain HLA-DRB, displays antigenic peptides on professional antigen presenting cells (APCs) for recognition by alpha-beta T cell receptor (TCR) on HLA-DR-restricted CD4-positive T cells. This guides antigen-specific T-helper effector functions, both antibody-mediated immune res…			https://www.uniprot.org/uniprot/P01903#function					https://www.genecards.org/cgi-bin/carddisp.pl?gene=HLA-DRA#function
			rs9469113		G/A		2.495e-21		1.551e-07									(17).Graham-Little-Piccardi-Lassueur syndrome in siblings. Gabriele Biondi, Rosanna Satta, Amelia Lissia, Antonella M Fara, Maria A Montesu.Int J Dermatol. 60(9):e347-e349(2021)
			rs7770920		T/A		3.508e-24		1.697e-10		HLA-DRB9		HLA-DRB9 (Major Histocompatibility Complex, Class II, DR Beta 9 (Pseudogene)) is a Pseudogene		rheumatoid arthritis (25)			(18).Polymorphisms and haplotype analysis of IL-4Ralpha Q576R and I75V in patients with penicillin allergy.Chen-Zheng Huang, Jing Yang, Hai-Ling Qiao, Lin-Jing Jia.Eur J Clin Pharmacol. 65(9):895-902(2009)
			rs6457596		C/T		3.508e-24		1.697e-10						Vogt-Koyanagi-Harada disease (26)			HLA-DR,beta 9 pseudogene,isolated fragment			https://www.uniprot.org/uniprot/D7GNM9					https://www.genecards.org/cgi-bin/carddisp.pl?gene=HLA-DRB9#function
			rs111573974		(-/G )		3.508e-24		1.697e-10						multiple sclerosis (27)			(25). Jiang X, Källberg H, Chen Z, Ärlestig L, Rantapää-Dahlqvist S, Davila S, Klareskog L, Padyukov L, Alfredsson L. An Immunochip-based interaction study of contrasting interaction effects with smoking in ACPA-positive versus ACPA-negative rheumatoid arthritis. Rheumatology (Oxford). 2016 Jan;55(1):149-55.
			rs6924760		A/G		3.523e-24		1.714e-10									(26). Hou S, Du L, Lei B, Pang CP, Zhang M, Zhuang W, Zhang M, Huang L, Gong B, Wang M, Zhang Q, Hu K, Zhou Q, Qi J, Wang C, Tian Y, Ye Z, Liang L, Yu H, Li H, Zhou Y, Cao Q, Liu Y, Bai L, Liao D, Kijlstra A, Xu J, Yang Z, Yang P. Genome-wide association analysis of Vogt-Koyanagi-Harada syndrome identifies two new susceptibility loci at 1p31.2 and 10q21.3. Nat Genet. 2014 Sep;46(9):1007-11.
			rs9286789		T/G		3.523e-24		1.714e-10									(27). Goris A, Pauwels I, Gustavsen MW, van Son B, Hilven K, Bos SD, Celius EG, Berg-Hansen P, Aarseth J, Myhr KM, D'Alfonso S, Barizzone N, Leone MA, Martinelli Boneschi F, Sorosina M, Liberatore G, Kockum I, Olsson T, Hillert J, Alfredsson L, Bedri SK, Hemmer B, Buck D, Berthele A, Knier B, Biberacher V, van Pesch V, Sindic C, Bang Oturai A, Søndergaard HB, Sellebjerg F, Jensen PE, Comabella M,…
	14		rs2160215		T/A		4.445e-20		8.985e-09		TSHR		Plays a central role in controlling thyroid cell metabolism (By similarity).(19)		Hypothyroidism, congenital, non-goitrous, 1 (CHNG1)(20)
			rs1023586		T/C		4.445e-20		8.985e-09						Familial gestational hyperthyroidism (HTFG)(21)			Receptor for the thyroid-stimulating hormone (TSH) or thyrotropin (PubMed:11847099, PubMed:12045258). Also acts as a receptor for the heterodimeric glycoprotein hormone (GPHA2:GPHB5) or thyrostimulin (PubMed:12045258). The activity of this receptor is mediated by G proteins which activate adenylate cyclase (PubMed:11847099). Plays a central role in controlling thyroid cell metabolism (By similari…			https://www.uniprot.org/uniprot/P16473#function					https://www.genecards.org/cgi-bin/carddisp.pl?gene=TSHR#function
			rs28414437		A/C		1.053e-19		1.248e-08						Hyperthyroidism, non-autoimmune (HTNA)(22)			(19)."Thyrostimulin, a heterodimer of two new human glycoprotein hormone subunits, activates the thyroid-stimulating hormone receptor."Nakabayashi K., Matsumi H., Bhalla A., Bae J., Mosselman S., Hsu S.Y., Hsueh A.J.W.J. Clin. Invest. 109:1445-1452(2002)
			rs11159479		C/T		1.683e-18		2.976e-08									(20)."Loss-of-function variants in a Hungarian cohort reveal structural insights on TSH receptor maturation and signaling."Labadi A., Grassi E.S., Gellen B., Kleinau G., Biebermann H., Ruzsa B., Gelmini G., Rideg O., Miseta A., Kovacs G.L., Patocs A., Felszeghy E., Nagy E.V., Mezosi E., Persani L. J. Clin. Endocrinol. Metab. 100:E1039-E1045(2015)
			rs56389234		G/A		1.683e-18		2.976e-08									(21)."Familial gestational hyperthyroidism caused by a mutant thyrotropin receptor hypersensitive to human chorionic gonadotropin."Rodien P., Bremont C., Raffin Sanson M.-L., Parma J., van Sande J., Costagliola S., Luton J.-P., Vassart G., Duprez L. N. Engl. J. Med. 339:1823-1826(1998)
			rs4903961		C/G		5.438e-20		1.325e-08		RPL17P3		RPL17P3 (Ribosomal Protein L17 Pseudogene 3) is a Pseudogene.		Thyroid (28)			(22)."Premature birth and low birth weight associated with nonautoimmune hyperthyroidism due to an activating thyrotropin receptor gene mutation."Vaidya B., Campbell V., Tripp J.H., Spyer G., Hattersley A.T., Ellard S.Clin. Endocrinol. (Oxf.) 60:711-718(2004)
			rs4903962		A/G		6.084e-19		1.629e-08												https://www.ncbi.nlm.nih.gov/gene/6139					https://www.genecards.org/cgi-bin/carddisp.pl?gene=RPL17P3#function
			rs2268459		A/G		6.613e-19		4.758e-08
			rs12323356		A/C		1.054e-18		1.715e-08
			rs228127		G/A		9.84e-15		3.161e-06		CEP128		CEP128 (Centrosomal Protein 128) is a Protein Coding gene.		Hypothyroidism, Congenital, Nongoitrous, 1 (CHNG1)(23)			RPL17P3 (Ribosomal Protein L17 Pseudogene 3) is a Pseudogene.
			rs7154132		C/T		1.048e-14		6.051e-06						Hyperthyroidism, Nonautoimmune (HTNA)(24)			(28). GTEx Consortium. The Genotype-Tissue Expression (GTEx) project. Nat Genet. 2013 Jun;45(6):580-5.			https://www.uniprot.org/uniprot/Q6ZU80					https://www.genecards.org/cgi-bin/carddisp.pl?gene=CEP128#aliases_descriptions
			rs35176982		(-/AA)		1.399e-14		4.794e-06
			rs1025253		G/A		1.463e-14		4.247e-06
			rs8022411		G/T		1.463e-14		4.247e-06									CEP128 (Centrosomal Protein 128) is a Protein Coding gene. Diseases associated with CEP128 include Hypothyroidism, Congenital, Nongoitrous, 1 and Hyperthyroidism, Nonautoimmune.
																		(23).A novel mutation in the thyrotropin (TSH) receptor gene causing loss of TSH binding but constitutive receptor activation in a family with resistance to TSH.D Russo 1, C Betterle, F Arturi, E Chiefari, M E Girelli, S Filetti.J Clin Endocrinol Metab. 85(11):4238-42(2000)
																		(24).The first activating TSH receptor mutation in transmembrane domain 1 identified in a family with nonautoimmune hyperthyroidism.H Biebermann, T Schöneberg, C Hess, J Germak, T Gudermann, A Grüters.J Clin Endocrinol Metab. 86(9):4429-33(2001)

## Sheet: Table 2
Table 2 | Lead SNPs from the discovery- and replication-analysis
	CHR		SNP		A1/A2		p value (GWAS results)		p value (Replication)		Gene		Function of gene		Involvement in disease
	2		rs1427680		G/A		2.072e-14		8.15e-06		CTLA4		Inhibitory receptor acting as a major negative regulator of T-cell responses.15, 16		Systemic lupus erythematosus (SLE) 17
			rs736611		C/T		2.186e-14		9.962e-06						Diabetes mellitus, insulin-dependent, 12 (IDDM12) 18			Inhibitory receptor acting as a major negative regulator of T-cell responses. The affinity of CTLA4 for its natural B7 family ligands, CD80 and CD86, is considerably stronger than the affinity of their cognate stimulatory coreceptor CD28.			https://www.uniprot.org/uniprot/P16410#function					https://www.genecards.org/cgi-bin/carddisp.pl?gene=CTLA4#function
			rs11571315		T/C		2.188e-14		9.432e-06						Celiac disease 3 (CELIAC3) 19			(1). "CTLA-4 is a second receptor for the B cell activation antigen B7." Linsley P.S., Brady W., Urnes M., Griosmaire L.S., Damle N.K., Ledbetter J.A. J. Exp. Med. 174:561-569(1991)			(2). "A molecular perspective of CTLA-4 function." Teft W.A., Kirchhof M.G., Madrenas J. Annu. Rev. Immunol. 24:65-97(2006)
			rs231723		A/G		3.236e-14		9.247e-06						Autoimmune lymphoproliferative syndrome 5 (ALPS5) 20			(3)."CTLA-4 polymorphisms and systemic lupus erythematosus (SLE): a meta-analysis." Lee Y.H., Harley J.B., Nath S.K. Hum. Genet. 116:361-367(2005)			(4). "Insulin-dependent diabetes mellitus (IDDM) is associated with CTLA4 polymorphisms in multiple ethnic groups." Marron M.P., Raffel L.J., Garchon H.-J., Jacob C.O., Serrano-Rios M., Martinez Larrad M.T., Teng W.-P., Park Y., Zhang Z.-X., Goldstein D.R., Tao Y.-W., Beaurain G., Bach J.-F., Huang H.-S., Luo D.-F., Zeidler A., Rotter J.I., Yang M.C.K. She J.-X. Hum. Mol. Genet. 6:1275-1282(1997)
	6		rs117116160		C/T		7.726e-33		1.227e-12		HCP5		HCP5 (HLA Complex P5) is an RNA Gene, and is affiliated with the lncRNA class.		Acquired Immunodeficiency Syndrome 21			(5). "A common CTLA4 haplotype associated with coeliac disease." Hunt K.A., McGovern D.P.B., Kumar P.J., Ghosh S., Travis S.P.L., Walters J.R.F., Jewell D.P., Playford R.J., van Heel D.A. Eur. J. Hum. Genet. 13:440-444(2005)			(6). "Autosomal dominant immune dysregulation syndrome in humans with CTLA4 mutations." Schubert D., Bode C., Kenefeck R., Hou T.Z., Wing J.B., Kennedy A., Bulashevska A., Petersen B.S., Schaeffer A.A., Gruening B.A., Unger S., Frede N., Baumann U., Witte T., Schmidt R.E., Dueckers G., Niehues T., Seneviratne S. Grimbacher B. Nat. Med. 20:1410-1416(2014)
			rs117884751		T/A		2.558e-32		1.762e-12						Thyroid Gland Follicular Carcinoma 22
			rs3763287		C/A		5.249e-25		1.413e-11
			rs114202986		T/A		4.604e-24		3.452e-10									HCP5 (HLA Complex P5) is an RNA Gene, and is affiliated with the lncRNA class. Diseases associated with HCP5 include Acquired Immunodeficiency Syndrome and Thyroid Gland Follicular Carcinoma			https://www.uniprot.org/uniprot/Q6MZN7					https://www.genecards.org/cgi-bin/carddisp.pl?gene=HCP5#function
			rs3763288		G/A		5.038e-24		3.875e-10									(7). Novel association of five HLA alleles with HIV-1 progression in Spanish long-term non progressor patients. Ramirez de Arellano E, Diez-Fuertes F, Aguilar F, (and 16 more) ; PLoS One (2019)
			rs141618471		A/G		1.009e-31		2.308e-13		HLA-B		HLA-B (Major Histocompatibility Complex, Class I, B) is a Protein Coding gene.		Stevens-Johnson syndrome (SJS) 23			(8). Correction: LncRNA HCP5A promotes follicular thyroid carcinoma progression via miRNAs sponge. Liang L, Xu J, Wang M, Xu G, Zhang N, Wang G, Zhao Y. Cell Death Dis. 2019 Sep 3;10(9):639
			rs9378228		G/T		1.704e-31		4.476e-12						Spondyloarthropathy 1 (SPDA1) 24
			rs12524692		T/A		7.741e-29		1.761e-12									HLA-B (Major Histocompatibility Complex, Class I, B) is a Protein Coding gene. Diseases associated with HLA-B include Severe Cutaneous Adverse Reaction and Spondyloarthropathy 1. Among its related pathways are Actin Nucleation by ARP-WASP Complex and Allograft rejection. Gene Ontology (GO) annotations related to this gene include signaling receptor binding and peptide antigen binding. An importan…			https://www.uniprot.org/uniprot/P01889					https://www.genecards.org/cgi-bin/carddisp.pl?gene=HLA-B#function
			rs72860306		C/T		5.838e-28		2.162e-11									(10)."Medical genetics: a marker for Stevens-Johnson syndrome."Chung W.-H., Hung S.-I., Hong H.-S., Hsih M.-S., Yang L.-C., Ho H.-C., Wu J.-Y., Chen Y.-T.Nature 428:486-486(2004)
			rs9357121		T/G		9.242e-22		4.977e-12									(11)."HLA-B27 in the Greek Cypriot population: distribution of subtypes in patients with ankylosing spondylitis and other HLA-B27-related diseases. The possible protective role of B*2707."Varnavidou-Nicolaidou A., Karpasitou K., Georgiou D., Stylianou G., Kokkofitou A., Michalis C., Constantina C., Gregoriadou C., Kyriakides G.Hum. Immunol. 65:1451-1454(2004)
			rs117588763		C/T		2.882e-30		3.548e-11		POU5F1		Critical for early embryogenesis and for embryonic stem cell pluripotency. 25		Embryonal Carcinoma 26
			rs9357112		A/G		2.882e-30		3.548e-11						Teratoma 27
			rs9357114		T/G		2.882e-30		3.548e-11									Transcription factor that binds to the octamer motif (5'-ATTTGCAT-3'). Forms a trimeric complex with SOX2 or SOX15 on DNA and controls the expression of a number of genes involved in embryonic development such as YES1, FGF4, UTF1 and ZFP206. Critical for early embryogenesis and for embryonic stem cell pluripotency.			https://www.uniprot.org/uniprot/Q01860#expression					https://www.genecards.org/cgi-bin/carddisp.pl?gene=POU5F1#function
			rs9348855		A/C		2.882e-30		3.548e-11									(12)."Induction of pluripotent stem cells from adult human fibroblasts by defined factors."Takahashi K., Tanabe K., Ohnuki M., Narita M., Ichisaka T., Tomoda K., Yamanaka S.Cell 131:861-872(2007)
			rs4713439		A/G		3.473e-30		4.104e-11									(13).Alpha-fetoprotein-producing non-germ cell tumours of the female genital tract.M El-Bahrawy.Eur J Cancer 46(8):1317-22(2010)
			rs28652698		G/A		3.568e-28		2.057e-11		CCHCR1		Critical for early embryogenesis and for embryonic stem cell pluripotency.		Psoriasis 28			(14).Generation of induced pluripotent stem cells from newborn marmoset skin fibroblasts.Yuehong Wu, Yong Zhang, Anuja Mishra, Suzette D Tardif, Peter J Hornsby.Stem Cell Res 4(3):180-8(2010)
			rs28383832		(-/CGCC)		1.703e-20		6.47e-10						Psoriasis 1 (PSORS1) 29
			rs1265082		G/A		1.835e-20		4.211e-10									May be a regulator of keratinocyte proliferation or differentiation.			https://www.uniprot.org/uniprot/Q8TD31#function					https://www.genecards.org/cgi-bin/carddisp.pl?gene=CCHCR1#function
			rs1265113		C/G		1.835e-20		4.211e-10									(15).The effects of acupuncture for patients with psoriasis: Study protocol for a randomized controlled trial.Juan Du, Jiming Tao, Ming Xu, Runnan Wang, Lanmei Lin, Xinyun Huang, Qunyi Li, Xiaonian Lu.Medicine (Baltimore) 28;100(2021)
			rs9469112		C/T		3.301e-26		1.714e-10		HLA-DRA		HLA-DRA (Major Histocompatibility Complex, Class II, DR Alpha) is a Protein Coding gene.		Graham-Little-Piccardi-Lassueur Syndrome 30			(16).Goldgar,Genki Hayashi, Emily H Olfson, Bing-Jian Feng, Clive R Pullinger, John P Kane, Carol A Wise, Raphaela Goldbach-Mansky, Michelle A Lowes, Lynette Peddle, Vinod Chandran, Wilson Liao, Proton Rahman, Gerald G Krueger, Dafna Gladman, James T Elder, Alan Menter, Anne M Bowcock.Am J Hum Genet.4;90(5):796-808(2012)
			rs16822660		T/C		1.358e-22		1.942e-08						Penicillin Allergy 31
			rs9469113		G/A		2.495e-21		1.551e-07									An alpha chain of antigen-presenting major histocompatibility complex class II (MHCII) molecule. In complex with the beta chain HLA-DRB, displays antigenic peptides on professional antigen presenting cells (APCs) for recognition by alpha-beta T cell receptor (TCR) on HLA-DR-restricted CD4-positive T cells. This guides antigen-specific T-helper effector functions, both antibody-mediated immune res…			https://www.uniprot.org/uniprot/P01903#function					https://www.genecards.org/cgi-bin/carddisp.pl?gene=HLA-DRA#function
			rs7770920		T/A		3.508e-24		1.697e-10		HLA-DRB9		HLA-DRB9 (Major Histocompatibility Complex, Class II, DR Beta 9 (Pseudogene)) is a Pseudogene.		rheumatoid arthritis 32			(17).Graham-Little-Piccardi-Lassueur syndrome in siblings. Gabriele Biondi, Rosanna Satta, Amelia Lissia, Antonella M Fara, Maria A Montesu.Int J Dermatol. 60(9):e347-e349(2021)
			rs6457596		C/T		3.508e-24		1.697e-10						Vogt-Koyanagi-Harada disease 33			(18).Polymorphisms and haplotype analysis of IL-4Ralpha Q576R and I75V in patients with penicillin allergy.Chen-Zheng Huang, Jing Yang, Hai-Ling Qiao, Lin-Jing Jia.Eur J Clin Pharmacol. 65(9):895-902(2009)
			rs111573974		(-/G )		3.508e-24		1.697e-10						multiple sclerosis 34			HLA-DR,beta 9 pseudogene,isolated fragment			https://www.uniprot.org/uniprot/D7GNM9					https://www.genecards.org/cgi-bin/carddisp.pl?gene=HLA-DRB9#function
			rs6924760		A/G		3.523e-24		1.714e-10									(25). Jiang X, Källberg H, Chen Z, Ärlestig L, Rantapää-Dahlqvist S, Davila S, Klareskog L, Padyukov L, Alfredsson L. An Immunochip-based interaction study of contrasting interaction effects with smoking in ACPA-positive versus ACPA-negative rheumatoid arthritis. Rheumatology (Oxford). 2016 Jan;55(1):149-55.
			rs9286789		T/G		3.523e-24		1.714e-10									(26). Hou S, Du L, Lei B, Pang CP, Zhang M, Zhuang W, Zhang M, Huang L, Gong B, Wang M, Zhang Q, Hu K, Zhou Q, Qi J, Wang C, Tian Y, Ye Z, Liang L, Yu H, Li H, Zhou Y, Cao Q, Liu Y, Bai L, Liao D, Kijlstra A, Xu J, Yang Z, Yang P. Genome-wide association analysis of Vogt-Koyanagi-Harada syndrome identifies two new susceptibility loci at 1p31.2 and 10q21.3. Nat Genet. 2014 Sep;46(9):1007-11.
	14		rs2160215		T/A		4.445e-20		8.985e-09		TSHR		Plays a central role in controlling thyroid cell metabolism (By similarity). 35		Hypothyroidism, congenital, non-goitrous, 1 (CHNG1) 36			(27). Goris A, Pauwels I, Gustavsen MW, van Son B, Hilven K, Bos SD, Celius EG, Berg-Hansen P, Aarseth J, Myhr KM, D'Alfonso S, Barizzone N, Leone MA, Martinelli Boneschi F, Sorosina M, Liberatore G, Kockum I, Olsson T, Hillert J, Alfredsson L, Bedri SK, Hemmer B, Buck D, Berthele A, Knier B, Biberacher V, van Pesch V, Sindic C, Bang Oturai A, Søndergaard HB, Sellebjerg F, Jensen PE, Comabella M,…
			rs1023586		T/C		4.445e-20		8.985e-09						Familial gestational hyperthyroidism (HTFG) 37
			rs28414437		A/C		1.053e-19		1.248e-08						Hyperthyroidism, non-autoimmune (HTNA) 38			Receptor for the thyroid-stimulating hormone (TSH) or thyrotropin (PubMed:11847099, PubMed:12045258). Also acts as a receptor for the heterodimeric glycoprotein hormone (GPHA2:GPHB5) or thyrostimulin (PubMed:12045258). The activity of this receptor is mediated by G proteins which activate adenylate cyclase (PubMed:11847099). Plays a central role in controlling thyroid cell metabolism (By similari…			https://www.uniprot.org/uniprot/P16473#function					https://www.genecards.org/cgi-bin/carddisp.pl?gene=TSHR#function
			rs11159479		C/T		1.683e-18		2.976e-08									(19)."Thyrostimulin, a heterodimer of two new human glycoprotein hormone subunits, activates the thyroid-stimulating hormone receptor."Nakabayashi K., Matsumi H., Bhalla A., Bae J., Mosselman S., Hsu S.Y., Hsueh A.J.W.J. Clin. Invest. 109:1445-1452(2002)
			rs56389234		G/A		1.683e-18		2.976e-08									(20)."Loss-of-function variants in a Hungarian cohort reveal structural insights on TSH receptor maturation and signaling."Labadi A., Grassi E.S., Gellen B., Kleinau G., Biebermann H., Ruzsa B., Gelmini G., Rideg O., Miseta A., Kovacs G.L., Patocs A., Felszeghy E., Nagy E.V., Mezosi E., Persani L. J. Clin. Endocrinol. Metab. 100:E1039-E1045(2015)
			rs4903962		A/G		6.084e-19		1.629e-08		RPL17P3		RPL17P3 (Ribosomal Protein L17 Pseudogene 3) is a Pseudogene.		thyroid 39			(21)."Familial gestational hyperthyroidism caused by a mutant thyrotropin receptor hypersensitive to human chorionic gonadotropin."Rodien P., Bremont C., Raffin Sanson M.-L., Parma J., van Sande J., Costagliola S., Luton J.-P., Vassart G., Duprez L. N. Engl. J. Med. 339:1823-1826(1998)
			rs2268459		A/G		6.613e-19		4.758e-08									(22)."Premature birth and low birth weight associated with nonautoimmune hyperthyroidism due to an activating thyrotropin receptor gene mutation."Vaidya B., Campbell V., Tripp J.H., Spyer G., Hattersley A.T., Ellard S.Clin. Endocrinol. (Oxf.) 60:711-718(2004)
			rs12323356		A/C		1.054e-18		1.715e-08												https://www.ncbi.nlm.nih.gov/gene/6139					https://www.genecards.org/cgi-bin/carddisp.pl?gene=RPL17P3#function
			rs228127		G/A		9.84e-15		3.161e-06		CEP128		CEP128 (Centrosomal Protein 128) is a Protein Coding gene.		Hypothyroidism, Congenital, Nongoitrous, 1 (CHNG1) 40
			rs7154132		C/T		1.048e-14		6.051e-06						Hyperthyroidism, Nonautoimmune (HTNA) 41
			rs35176982		(-/AA)		1.399e-14		4.794e-06									RPL17P3 (Ribosomal Protein L17 Pseudogene 3) is a Pseudogene.
			rs1025253		G/A		1.463e-14		4.247e-06									(28). GTEx Consortium. The Genotype-Tissue Expression (GTEx) project. Nat Genet. 2013 Jun;45(6):580-5.			https://www.uniprot.org/uniprot/Q6ZU80					https://www.genecards.org/cgi-bin/carddisp.pl?gene=CEP128#aliases_descriptions
			rs8022411		G/T		1.463e-14		4.247e-06
																		CEP128 (Centrosomal Protein 128) is a Protein Coding gene. Diseases associated with CEP128 include Hypothyroidism, Congenital, Nongoitrous, 1 and Hyperthyroidism, Nonautoimmune.
																		(23).A novel mutation in the thyrotropin (TSH) receptor gene causing loss of TSH binding but constitutive receptor activation in a family with resistance to TSH.D Russo 1, C Betterle, F Arturi, E Chiefari, M E Girelli, S Filetti.J Clin Endocrinol Metab. 85(11):4238-42(2000)
																		(24).The first activating TSH receptor mutation in transmembrane domain 1 identified in a family with nonautoimmune hyperthyroidism.H Biebermann, T Schöneberg, C Hess, J Germak, T Gudermann, A Grüters.J Clin Endocrinol Metab. 86(9):4429-33(2001)
