# Supplementary material for: Genome-wide association study of hyperthyroidism based on electronic medical record from Taiwan
Source: Front Med (Lausanne). 2022 Jul 27;9:830621. doi: 10.3389/fmed.2022.830621 (PMC9390483; doi:10.3389/fmed.2022.830621)
Supplement: Supplementary file 4 [file Table_3.XLSX]

## Sheet: Imputed variant
Chromosome	Physical Position	Ref allele	Alt allele	RefSNP ID	Affy probeSet ID	Affy SNP ID	Associated Gene	TPMI Minor Allele	TPMI MAF	Alt Allele Frequency (NGS)	Allele Frequencies from Genomic Studies
14	80873512	G	A	rs228127			CEP128	G	0.29264	0.72041	1000Genomes:0.2742,0.7258,.,.|ALSPAC:0.398,0.602,.,.|Estonian:0.4357,0.5643,.,.|GENOME_DK:0.3,0.7,.,.|GnomAD:0.3264,0.6736,.,.|GoNL:0.4018,0.5982,.,.|KOREAN:0.2563,0.7437,0,0|Korea1K:0.2598,0.7402,.,.|NorthernSweden:0.3817,0.6183,.,.|Qatari:0.3056,0.6944,.,.|SGDP_PRJ:0.2029,0.7971,.,.|Siberian:0.2391,0.7609,.,.|TOPMED:0.2973,0.7027,.,.|TWINSUK:0.3951,0.6049,.,.|Vietnamese:0.3925,0.6075,.,.|dbGaP_…
14	80905646	T	TAA	rs35176982			CEP128	T	0.29258	0.71868	1000Genomes:0.2622,0.7378|ALSPAC:0.3972,0.6028|Estonian:0.4373,0.5627|GENOME_DK:0.3,0.7|GnomAD:0.3135,0.6865|GoNL:0.4008,0.5992|Korea1K:0.2642,0.7358|NorthernSweden:0.3817,0.6183|TOPMED:0.2861,0.7139|TWINSUK:0.3954,0.6046|dbGaP_PopFreq:0.3953,0.6047
14	80911738	C	T	rs7154132			CEP128	C	0.29021	0.72145	1000Genomes:0.274,0.726|ALSPAC:0.3965,0.6035|Estonian:0.4355,0.5645|GENOME_DK:0.3,0.7|GnomAD:0.3258,0.6742|GoNL:0.4008,0.5992|HapMap:0.2247,0.7753|KOREAN:0.2614,0.7386|Korea1K:0.2647,0.7353|NorthernSweden:0.3833,0.6167|Qatari:0.3056,0.6944|SGDP_PRJ:0.2037,0.7963|Siberian:0.2391,0.7609|TOPMED:0.2953,0.7047|TWINSUK:0.3932,0.6068|Vietnamese:0.381,0.619|dbGaP_PopFreq:0.3343,0.6657
14	80922922	G	A	rs1025253			CEP128	G	0.29064	0.72145	1000Genomes:0.2841,0.7159,.|ALSPAC:0.3983,0.6017,.|Estonian:0.4346,0.5654,.|GENOME_DK:0.3,0.7,.|GnomAD:0.3329,0.6671,.|GoNL:0.4038,0.5962,.|HapMap:0.2384,0.7616,.|KOREAN:0.2638,0.7362,.|Korea1K:0.2642,0.7358,.|NorthernSweden:0.39,0.61,.|Qatari:0.3148,0.6852,.|SGDP_PRJ:0.2107,0.7872,0.002066|Siberian:0.2391,0.7609,.|TOPMED:0.3048,0.6952,.|TWINSUK:0.3962,0.6038,.|Vietnamese:0.3796,0.6204,.|dbGaP_Po…
14	80924841	G	T	rs8022411			CEP128	G	0.29064	0.72145	1000Genomes:0.2748,.,0.7252|ALSPAC:0.398,.,0.602|Estonian:0.4346,.,0.5654|GENOME_DK:0.3,.,0.7|GnomAD:0.3263,.,0.6737|GoNL:0.4038,.,0.5962|HapMap:0.2622,.,0.7378|KOREAN:0.2635,0,0.7365|Korea1K:0.2642,.,0.7358|NorthernSweden:0.39,.,0.61|Qatari:0.3102,.,0.6898|SGDP_PRJ:0.207,.,0.793|Siberian:0.2391,.,0.7609|TOPMED:0.2977,.,0.7023|TWINSUK:0.3962,.,0.6038|Vietnamese:0.3645,.,0.6355|dbGaP_PopFreq:0.396…
14	80990913	A	C	rs28414437			TSHR	A	0.36512	0.65363	1000Genomes:0.5757,0.4243|ALSPAC:0.6303,0.3697|Estonian:0.6991,0.3009|GENOME_DK:0.575,0.425|GnomAD:0.6231,0.3769|GoNL:0.6533,0.3467|KOREAN:0.3399,0.6601|NorthernSweden:0.58,0.42|Qatari:0.6343,0.3657|SGDP_PRJ:0.3098,0.6902|Siberian:0.3824,0.6176|TOPMED:0.5892,0.4108|TWINSUK:0.6238,0.3762|Vietnamese:0.4811,0.5189|dbGaP_PopFreq:0.6476,0.3524
14	80994307	C	T	rs11159479			TSHR	T	0.35449	0.3339	1000Genomes:0.6643,.,0.3357|ALSPAC:0.6046,.,0.3954|Estonian:0.5397,.,0.4603|GENOME_DK:0.725,.,0.275|GnomAD:0.6387,.,0.3613|GoNL:0.5872,.,0.4128|KOREAN:0.6826,0,0.3174|Korea1K:0.6812,.,0.3188|NorthernSweden:0.605,.,0.395|Qatari:0.6157,.,0.3843|SGDP_PRJ:0.3682,.,0.6318|Siberian:0.3438,.,0.6562|TOPMED:0.6659,.,0.3341|TWINSUK:0.6025,.,0.3975|Vietnamese:0.5748,.,0.4252|dbGaP_PopFreq:0.5978,.,0.4022
14	80995128	T	C	rs2160215			TSHR	T	0.3650599	0.65363	1000Genomes:0.5729,.,0.4271|ALSPAC:0.6297,.,0.3703|Estonian:0.6989,.,0.3011|GENOME_DK:0.575,.,0.425|GnomAD:0.6226,.,0.3774|GoNL:0.6543,.,0.3457|KOREAN:0.3321,.,0.6679|NorthernSweden:0.58,.,0.42|Qatari:0.6343,.,0.3657|SGDP_PRJ:0.3118,.,0.6882|Siberian:0.3824,.,0.6176|TOPMED:0.5888,.,0.4112|TWINSUK:0.6243,.,0.3757|Vietnamese:0.4583,.,0.5417|dbGaP_PopFreq:0.6472,.,0.3528
14	80995272	G	A	rs56389234			TSHR	A	0.35448	0.3339	1000Genomes:0.6721,0.3279,.|ALSPAC:0.6056,0.3944,.|Estonian:0.5395,0.4605,.|GENOME_DK:0.725,0.275,.|GnomAD:0.6462,0.3538,.|GoNL:0.5882,0.4118,.|KOREAN:0.6819,0.3181,0|Korea1K:0.6807,0.3193,.|NorthernSweden:0.605,0.395,.|Qatari:0.6204,0.3796,.|SGDP_PRJ:0.3733,0.6267,.|Siberian:0.3438,0.6562,.|TOPMED:0.6742,0.3258,.|TWINSUK:0.6033,0.3967,.|Vietnamese:0.5802,0.4198,.|dbGaP_PopFreq:0.5987,0.4013,.
14	80995939	T	C	rs1023586			TSHR	T	0.3650499	0.65363	1000Genomes:0.5725,0.4275,.|ALSPAC:0.6295,0.3705,.|Estonian:0.7,0.3,.|GENOME_DK:0.575,0.425,.|GnomAD:0.6233,0.3767,.|GoNL:0.6543,0.3457,.|KOREAN:0.3314,0.6686,0|NorthernSweden:0.58,0.42,.|Qatari:0.5972,0.4028,.|SGDP_PRJ:0.3081,0.6919,.|Siberian:0.4062,0.5938,.|TOPMED:0.5885,0.4115,.|TWINSUK:0.6238,0.3762,.|Vietnamese:0.4813,0.5187,.|dbGaP_PopFreq:0.6467,0.3533,.
14	80996697	A	G	rs2268459			TSHR	G	0.3542299	0.3339	1000Genomes:0.6641,0.3359|ALSPAC:0.5981,0.4019|Estonian:0.5357,0.4643|GENOME_DK:0.725,0.275|GnomAD:0.6384,0.3616|GoNL:0.5822,0.4178|KOREAN:0.6812,0.3188|Korea1K:0.6801,0.3199|NorthernSweden:0.58,0.42|Qatari:0.6528,0.3472|SGDP_PRJ:0.3673,0.6327|Siberian:0.3438,0.6562|TOPMED:0.6653,0.3347|TWINSUK:0.5982,0.4018|Vietnamese:0.5708,0.4292|dbGaP_PopFreq:0.5964,0.4036
14	80997935	A	G	rs12323356			TSHR	A	0.40328	0.60934	1000Genomes:0.497,.,0.503,.|ALSPAC:0.542,.,0.458,.|Daghestan:0.6083,.,0.3917,.|Estonian:0.6042,.,0.3958,.|GENOME_DK:0.475,.,0.525,.|GnomAD:0.5335,.,0.4665,.|GoNL:0.5511,.,0.4489,.|KOREAN:0.3945,.,0.6055,0|Korea1K:0.3788,.,0.6212,.|NorthernSweden:0.5367,.,0.4633,.|Qatari:0.537,.,0.463,.|SGDP_PRJ:0.2959,.,0.7041,.|Siberian:0.3684,.,0.6316,.|TOPMED:0.5052,.,0.4948,.|TWINSUK:0.5286,.,0.4714,.|Vietnam…
14	80998142	A	G	rs4903962			TSHR	A	0.40337	0.61003	1000Genomes:0.5575,.,0.4425,.|ALSPAC:0.5433,.,0.4567,.|Estonian:0.6042,.,0.3958,.|GENOME_DK:0.475,.,0.525,.|GnomAD:0.5858,.,0.4142,.|GoNL:0.5511,.,0.4489,.|KOREAN:0.3952,0,0.6048,0|Korea1K:0.3783,.,0.6217,.|NorthernSweden:0.5367,.,0.4633,.|Qatari:0.5694,.,0.4306,.|SGDP_PRJ:0.299,.,0.701,.|Siberian:0.3684,.,0.6316,.|TOPMED:0.5638,.,0.4362,.|TWINSUK:0.5299,.,0.4701,.|dbGaP_PopFreq:0.5544,.,0.4456,.
2	203865072	G	A	rs1427680				A	0.32311	0.32802	1000Genomes:0.4567,0.5433,.|ALSPAC:0.4079,0.5921,.|Daghestan:0.4004,0.5996,.|Estonian:0.4875,0.5125,.|GENOME_DK:0.475,0.525,.|GnomAD:0.4644,0.5356,.|GoNL:0.4188,0.5812,.|HapMap:0.4788,0.5212,.|KOREAN:0.7061,0.2939,0|Korea1K:0.7036,0.2964,.|NorthernSweden:0.5067,0.4933,.|Qatari:0.2454,0.7546,.|SGDP_PRJ:0.316,0.684,.|Siberian:0.3667,0.6333,.|TOPMED:0.4443,0.5557,.|TWINSUK:0.3986,0.6014,.|dbGaP_PopF…
2	203865742	C	T	rs736611				T	0.3230399	0.32802	1000Genomes:0.4567,0.5433|ALSPAC:0.4097,0.5903|Daghestan:0.4004,0.5996|Estonian:0.4879,0.5121|GENOME_DK:0.475,0.525|GnomAD:0.4646,0.5354|GoNL:0.4198,0.5802|HapMap:0.4875,0.5125|KOREAN:0.7061,0.2939|Korea1K:0.7036,0.2964|NorthernSweden:0.5067,0.4933|Qatari:0.2454,0.7546|SGDP_PRJ:0.316,0.684|Siberian:0.3667,0.6333|TOPMED:0.4445,0.5555|TWINSUK:0.3991,0.6009|Vietnamese:0.5817,0.4183|dbGaP_PopFreq:0.4…
2	203866178	T	C	rs11571315			CTLA4	C	0.3234	0.32872	1000Genomes:0.4744,0.5256|ALSPAC:0.4081,0.5919|Daghestan:0.3961,0.6039|Estonian:0.4882,0.5118|GENOME_DK:0.475,0.525|GnomAD:0.4766,0.5234|GoNL:0.4198,0.5802|HapMap:0.4925,0.5075|KOREAN:0.7055,0.2945|Korea1K:0.7027,0.2973|NorthernSweden:0.5067,0.4933|PAGE_STUDY:0.4804,0.5196|Qatari:0.25,0.75|SGDP_PRJ:0.3218,0.6782|Siberian:0.3667,0.6333|TOPMED:0.4581,0.5419|TWINSUK:0.3986,0.6014|Vietnamese:0.5833,0…
2	203875058	A	G	rs231723				A	0.3237999	0.67127	1000Genomes:0.5729,0.4271,.|ALSPAC:0.6201,0.3799,.|Estonian:0.5371,0.4629,.|GENOME_DK:0.55,0.45,.|GnomAD:0.5763,0.4237,.|GoNL:0.6122,0.3878,.|KOREAN:0.2942,0.7058,0|Korea1K:0.2969,0.7031,.|NorthernSweden:0.505,0.495,.|Qatari:0.787,0.213,.|SGDP_PRJ:0.3396,0.6604,.|Siberian:0.25,0.75,.|TOPMED:0.5999,0.4001,.|TWINSUK:0.6273,0.3727,.|Vietnamese:0.4333,0.5667,.|dbGaP_PopFreq:0.6433,0.3567,.
6	31143829	G	A	rs1265082			CCHCR1	A	0.29846	0.27024	1000Genomes:0.8177,0.1823|ALSPAC:0.8646,0.1354|Estonian:0.8868,0.1132|GnomAD:0.8612,0.1388|GoNL:0.8427,0.1573|KOREAN:0.716,0.284|NorthernSweden:0.8433,0.1567|Qatari:0.9074,0.09259|SGDP_PRJ:0.42,0.58|Siberian:0.375,0.625|TOPMED:0.8555,0.1445|TWINSUK:0.8625,0.1375|Vietnamese:0.7269,0.2731|dbGaP_PopFreq:0.8638,0.1362
6	31149800	C	G	rs1265113			CCHCR1	G	0.2984999	0.27058	1000Genomes:0.8175,0.1825,.|ALSPAC:0.8643,0.1357,.|Estonian:0.8868,0.1132,.|GnomAD:0.8608,0.1392,.|GoNL:0.8427,0.1573,.|KOREAN:0.7167,0.2833,.|NorthernSweden:0.8433,0.1567,.|Qatari:0.912,0.08796,.|SGDP_PRJ:0.42,0.58,.|Siberian:0.375,0.625,.|TOPMED:0.8555,0.1445,.|TWINSUK:0.8625,0.1375,.|dbGaP_PopFreq:0.8643,0.1357,.
6	31152460	T	TCCCG	rs28383832,rs781632346			CCHCR1	TCCCG	0.2979499	0.26782	Estonian:0.8871,0.1129|GENOME_DK:0.9,0.1|GnomAD:0.864,0.136|NorthernSweden:0.8433,0.1567
6	31153125	G	T	rs28652698			CCHCR1	T	0.1663	0.14429	1000Genomes:0.9535,.,0.04653|ALSPAC:0.9969,.,0.003114|Estonian:0.9958,.,0.004241|GoNL:0.994,.,0.006012|KOREAN:0.9154,0.0003413,0.0843|NorthernSweden:0.9967,.,0.003333|SGDP_PRJ:0.4615,.,0.5385|TOPMED:0.9856,.,0.01437|TWINSUK:0.997,.,0.002967|Vietnamese:0.8774,.,0.1226|dbGaP_PopFreq:0.9959,.,0.004113
6	31177625	C	T	rs117588763			PSORS1C3	T	0.17369	0.15536	1000Genomes:0.9387,0.0613|ALSPAC:0.987,0.01297|Estonian:0.9679,0.03214|GnomAD:0.9736,0.0264|GoNL:0.984,0.01603|KOREAN:0.9041,0.0959|MGP:0.9906,0.009363|NorthernSweden:0.9883,0.01167|Qatari:0.9769,0.02315|SGDP_PRJ:0.4423,0.5577|Siberian:0.5,0.5|TOPMED:0.9749,0.02505|TWINSUK:0.9857,0.01429|Vietnamese:0.8333,0.1667|dbGaP_PopFreq:0.9813,0.01874
6	31179249	A	G	rs4713439	AX-35730253	Affx-28443111	PSORS1C3	G	0.17435	0.15536	1000Genomes:0.9385,0.0615|ALSPAC:0.9873,0.01271|Estonian:0.9679,0.03214|GnomAD:0.9736,0.02642|GoNL:0.984,0.01603|KOREAN:0.9038,0.09625|NorthernSweden:0.9883,0.01167|Qatari:0.9769,0.02315|SGDP_PRJ:0.4423,0.5577|Siberian:0.5,0.5|TOPMED:0.9749,0.02507|TWINSUK:0.9857,0.01429|Vietnamese:0.8491,0.1509|dbGaP_PopFreq:0.9589,0.04107
6	31181082	A	G	rs9357112			PSORS1C3	G	0.17369	0.15536	1000Genomes:0.9385,0.0615|ALSPAC:0.987,0.01297|Estonian:0.9679,0.03214|GnomAD:0.9738,0.02623|GoNL:0.984,0.01603|KOREAN:0.9044,0.09556|NorthernSweden:0.9883,0.01167|Qatari:0.9769,0.02315|SGDP_PRJ:0.4423,0.5577|Siberian:0.5,0.5|TOPMED:0.9749,0.02512|TWINSUK:0.9857,0.01429|Vietnamese:0.8286,0.1714|dbGaP_PopFreq:0.9813,0.01874
6	31181521	T	G	rs9357114			PSORS1C3	G	0.17369	0.15536	1000Genomes:0.9385,0.0615|ALSPAC:0.987,0.01297|Estonian:0.9681,0.03192|GnomAD:0.9735,0.02649|KOREAN:0.9033,0.09665|NorthernSweden:0.9883,0.01167|Qatari:0.9769,0.02315|SGDP_PRJ:0.4423,0.5577|Siberian:0.5,0.5|TOPMED:0.9749,0.02506|TWINSUK:0.9857,0.01429|dbGaP_PopFreq:0.9813,0.01874
6	31184031	A	C	rs9348855			PSORS1C3	C	0.17371	0.15536	1000Genomes:0.9385,0.0615|ALSPAC:0.987,0.01297|Estonian:0.9679,0.03214|GnomAD:0.9736,0.02637|GoNL:0.984,0.01603|KOREAN:0.9041,0.0959|NorthernSweden:0.9883,0.01167|Qatari:0.9769,0.02315|SGDP_PRJ:0.4423,0.5577|Siberian:0.5,0.5|TOPMED:0.9749,0.02508|TWINSUK:0.9857,0.01429|Vietnamese:0.8318,0.1682|dbGaP_PopFreq:0.9813,0.01874
6	31264624	C	T	rs72860306				T	0.1683699	0.15259	1000Genomes:0.9431,0.05691|ALSPAC:0.9914,0.008563|GnomAD:0.9751,0.02491|GoNL:0.983,0.01703|KOREAN:0.9109,0.08908|NorthernSweden:0.9883,0.01167|Qatari:0.9769,0.02315|SGDP_PRJ:0.48,0.52|Siberian:0.5,0.5|TOPMED:0.9767,0.02333|TWINSUK:0.9916,0.00836|Vietnamese:0.8443,0.1557|dbGaP_PopFreq:0.9817,0.01828
6	31266368	T	A	rs12524692				A	0.1407599	0.12041	1000Genomes:0.9555,0.04453|GnomAD:0.9901,0.009878|GoNL:0.994,0.006012|KOREAN:0.9455,0.05453|NorthernSweden:0.9967,0.003333|SGDP_PRJ:0.5,0.5|TOPMED:0.9876,0.0124|Vietnamese:0.8925,0.1075|dbGaP_PopFreq:0.9954,0.00457
6	31272702	T	G	rs9357121	AX-41951099	Affx-28446994	HLA-C	G	0.19792	0.18961	1000Genomes:0.9307,0.06929|ALSPAC:0.9686,0.0314|GnomAD:0.957,0.04296|GoNL:0.9739,0.02605|HapMap:0.9456,0.05445|KOREAN:0.8246,0.1754|NorthernSweden:0.9517,0.04833|Qatari:0.9769,0.02315|SGDP_PRJ:0.4815,0.5185|Siberian:0.5,0.5|TOPMED:0.963,0.03697|TWINSUK:0.9663,0.03371|dbGaP_PopFreq:0.9608,0.03925
6	31278594	G	T	rs9378228	AX-11684234	Affx-28447281		T	0.12725	0.11314	1000Genomes:0.9724,0.02756|ALSPAC:0.9997,0.0002595|GnomAD:0.994,0.006049|HapMap:0.9628,0.03719|KOREAN:0.9596,0.04038|SGDP_PRJ:0.5,0.5|TOPMED:0.9932,0.006849|TWINSUK:1,0|Vietnamese:0.8935,0.1065|dbGaP_PopFreq:1,0
6	31287161	A	G	rs141618471				G	0.12801	0.11384	1000Genomes:0.972,0.02796|ALSPAC:0.9995,0.0005189|GnomAD:0.9938,0.006188|KOREAN:0.9596,0.04038|SGDP_PRJ:0.5,0.5|TWINSUK:1,0
6	31402552	C	A	rs3763287			MICA	A	0.25674	0.23529	1000Genomes:0.905,0.09505|ALSPAC:0.9382,0.06175|Daghestan:0.9623,0.0377|GnomAD:0.9302,0.06975|GoNL:0.9068,0.09319|HapMap:0.9363,0.06371|KOREAN:0.7816,0.2184|NorthernSweden:0.8833,0.1167|Qatari:0.9954,0.00463|SGDP_PRJ:0.3974,0.6026|Siberian:0.5,0.5|TOPMED:0.939,0.06099|TWINSUK:0.9326,0.06742|Vietnamese:0.8009,0.1991|dbGaP_PopFreq:0.9514,0.04863
6	31402590	G	A	rs3763288	AX-11478865	Affx-28455122	MICA	A	0.1922899	0.18269	1000Genomes:0.9239,0.07608|ALSPAC:0.9385,0.06149|Daghestan:0.9806,0.01943|GnomAD:0.9366,0.06335|GoNL:0.9068,0.09319|HapMap:0.9264,0.07363|KOREAN:0.8058,0.1942|NorthernSweden:0.8833,0.1167|SGDP_PRJ:0.3654,0.6346|Siberian:0.5,0.5|TOPMED:0.9447,0.05528|TWINSUK:0.9337,0.06634|Vietnamese:0.8565,0.1435|dbGaP_PopFreq:0.9411,0.05888
6	31408140	T	C	rs114202986			MICA	C	0.19225	0.18269	1000Genomes:0.9239,.,0.07608|ALSPAC:0.9382,.,0.06175|GENOME_DK:0.925,.,0.075|GoNL:0.9068,.,0.09319|KOREAN:0.8051,.,0.1949|NorthernSweden:0.8833,.,0.1167|SGDP_PRJ:0.3654,.,0.6346|Siberian:0.5,.,0.5|TOPMED:0.9447,.,0.05531|TWINSUK:0.9323,.,0.06769|Vietnamese:0.8551,.,0.1449|dbGaP_PopFreq:0.9406,.,0.05941
6	31415813	C	T	rs117116160			MICA	T	0.1436499	0.11937	1000Genomes:0.9673,0.03275|ALSPAC:0.9995,0.0005189|GnomAD:0.9938,0.006249|KOREAN:0.9565,0.04349|SGDP_PRJ:0.3571,0.6429|TWINSUK:0.9997,0.0002697
6	31434029	T	A	rs117884751				A	0.1446	0.12179	1000Genomes:0.9583,0.04173|ALSPAC:0.9995,0.0005189|Estonian:0.9998,0.0002232|GnomAD:0.991,0.008969|KOREAN:0.9476,0.05236|SGDP_PRJ:0.3,0.7|TOPMED:0.9882,0.01176|TWINSUK:1,0|Vietnamese:0.8692,0.1308|dbGaP_PopFreq:0.9986,0.001371
6	32445783	T	C	rs16822660	AX-11281269	Affx-28474755		C	0.0914399	0.09411	1000Genomes:0.9475,0.05252|ALSPAC:0.9917,0.008303|Daghestan:0.985,0.01502|Estonian:0.9987,0.001339|GnomAD:0.9691,0.03094|GoNL:0.993,0.007014|HapMap:0.9756,0.02439|KOREAN:0.9346,0.06537|NorthernSweden:0.9967,0.003333|PAGE_STUDY:0.9553,0.04466|Qatari:0.9769,0.02315|SGDP_PRJ:0.5,0.5|TOPMED:0.9654,0.03458|TWINSUK:0.9876,0.01241|Vietnamese:0.771,0.229|dbGaP_PopFreq:0.9673,0.03272
6	32447376	C	T	rs9469112	AX-35741163	Affx-28474831		T	0.12238	0.12595	1000Genomes:0.7885,0.2115|ALSPAC:0.8389,0.1611|Estonian:0.8453,0.1547|GENOME_DK:0.975,0.025|GnomAD:0.8352,0.1648|GoNL:0.8637,0.1363|KOREAN:0.8138,0.1862|NorthernSweden:0.8917,0.1083|PAGE_STUDY:0.85,0.15|Qatari:0.8657,0.1343|SGDP_PRJ:0.4444,0.5556|Siberian:0.5,0.5|TOPMED:0.8407,0.1593|TWINSUK:0.8387,0.1613|Vietnamese:0.6745,0.3255|dbGaP_PopFreq:0.8567,0.1433
6	32447441	G	A	rs9469113	AX-11688720	Affx-28474833		A	0.1034899	0.10622	1000Genomes:0.9093,0.09065|ALSPAC:0.9875,0.01245|Daghestan:0.9433,0.05674|Estonian:0.9973,0.002679|GnomAD:0.9653,0.0347|GoNL:0.989,0.01102|KOREAN:0.9045,0.09548|NorthernSweden:0.9967,0.003333|Qatari:0.9537,0.0463|SGDP_PRJ:0.473,0.527|Siberian:0.5,0.5|TOPMED:0.9592,0.04084|TWINSUK:0.9822,0.0178|dbGaP_PopFreq:0.9654,0.03458
6	32470827	A	T	rs6924760				T	0.10158	0.10657	1000Genomes:0.9141,0.08586|ALSPAC:0.9632,0.03684|Estonian:0.9806,0.01942|GENOME_DK:0.975,0.025|GnomAD:0.937,0.06303|GoNL:0.9339,0.06613|KOREAN:0.8833,0.1167|NorthernSweden:0.955,0.045|Qatari:0.9352,0.06481|SGDP_PRJ:0.4737,0.5263|Siberian:0.5,0.5|TOPMED:0.9301,0.06991|TWINSUK:0.9587,0.04126|dbGaP_PopFreq:0.951,0.04902
6	32471919	T	G	rs9286789				G	0.1016299	0.10692	1000Genomes:0.9141,0.08586|ALSPAC:0.9632,0.03684|Estonian:0.9806,0.01942|GnomAD:0.9368,0.06323|GoNL:0.9339,0.06613|KOREAN:0.8833,0.1167|NorthernSweden:0.955,0.045|Qatari:0.9352,0.06481|SGDP_PRJ:0.4737,0.5263|Siberian:0.5,0.5|TOPMED:0.9301,0.0699|TWINSUK:0.959,0.04099|dbGaP_PopFreq:0.9512,0.04884
6	32476339	T	A	rs7770920				A	0.10179	0.10692	1000Genomes:0.9161,0.08387|ALSPAC:0.9632,0.03684|GnomAD:0.9407,0.05933|GoNL:0.9339,0.06613|KOREAN:0.8905,0.1095|Qatari:0.9398,0.06019|SGDP_PRJ:0.5,0.5|Siberian:0.5,0.5|TWINSUK:0.9587,0.04126
6	32476498	C	T	rs6457596				T	0.1017799	0.10692	1000Genomes:0.9159,0.08407|ALSPAC:0.9632,0.03684|Daghestan:0.9471,0.05287|GENOME_DK:0.975,0.025|GnomAD:0.9399,0.06013|GoNL:0.9339,0.06613|KOREAN:0.8908,0.1092|NorthernSweden:0.9567,0.04333|Qatari:0.9398,0.06019|SGDP_PRJ:0.5,0.5|Siberian:0.5,0.5|TWINSUK:0.9587,0.04126|dbGaP_PopFreq:0.9143,0.08574
6	32476653	T	TG	rs111573974				TG	0.10179	0.10692	1000Genomes:0.9141,0.08586|ALSPAC:0.9632,0.03684|GnomAD:0.9312,0.0688|GoNL:0.9339,0.06613|NorthernSweden:0.955,0.045|TOPMED:0.9302,0.06982|TWINSUK:0.9598,0.04018|dbGaP_PopFreq:0.9511,0.0489

## Sheet: TWBv2.0
Array Version	ProbeSet ID	Affy SNP ID	RefSNP ID	Chromosome	Physical Position	Ref Allele	Alt Allele	Strand	TPMI Minor Allele	TPMI MAF	Associated Gene	OMIM	Clinical Significance	ClinVar	Allele Frequencies	ProbeSet Blacklisted
TWBv2.0	AX-35730253	Affx-28443111	rs4713439	6	31179249	A	G	+	G	0.1763	PSORS1C3				--- // 0.0051 // CEU /// --- // 0.1311 // CHB /// --- // 0.1250 // JPT /// --- // 0.0046 // YRI	false
TWBv2.0	AX-41951099	Affx-28446994	rs9357121	6	31272702	T	G	+	G	0.1998399	HLA-C	PSORIASIS 1, SUSCEPTIBILITY TO; PSORS1\ MAJOR HISTOCOMPATIBILITY COMPLEX, CLASS I, C; HLA-C\ SEVERE CUTANEOUS ADVERSE REACTION, SUSCEPTIBILITY TO\ MAJOR HISTOCOMPATIBILITY COMPLEX, CLASS I, B; HLA-B\ HUMAN IMMUNODEFICIENCY VIRUS TYPE 1, SUSCEPTIBILITY TO\ SPONDYLOARTHROPATHY, SUSCEPTIBILITY TO, 1; SPDA1			--- // 0.0202 // CEU /// --- // 0.1650 // CHB /// --- // 0.1298 // JPT /// --- // 0.0046 // YRI	false
TWBv2.0	AX-11684234	Affx-28447281	rs9378228	6	31278594	G	T	+	T	0.1284299	USP8P1	PSORIASIS 1, SUSCEPTIBILITY TO; PSORS1\ MAJOR HISTOCOMPATIBILITY COMPLEX, CLASS I, C; HLA-C\ SEVERE CUTANEOUS ADVERSE REACTION, SUSCEPTIBILITY TO\ MAJOR HISTOCOMPATIBILITY COMPLEX, CLASS I, B; HLA-B\ SPONDYLOARTHROPATHY, SUSCEPTIBILITY TO, 1; SPDA1\ HUMAN IMMUNODEFICIENCY VIRUS TYPE 1, SUSCEPTIBILITY TO			0.0000 // --- // CEU /// 0.0874 // --- // CHB /// 0.0433 // --- // JPT /// 0.0000 // --- // YRI	false
TWBv2.0	AX-11478865	Affx-28455122	rs3763288	6	31402590	G	A	+	A	0.19369	MICA				0.0606 // --- // CEU /// 0.1990 // --- // CHB /// 0.1250 // --- // JPT /// 0.0046 // --- // YRI	false
TWBv2.0	AX-11281269	Affx-28474755	rs16822660	6	32445783	T	C	+	C	0.08945					--- // 0.0000 // CEU /// --- // 0.0680 // CHB /// --- // 0.0240 // JPT /// --- // 0.0648 // YRI	false
TWBv2.0	AX-35741163	Affx-28474831	rs9469112	6	32447376	C	T	+	T	0.1165					0.1869 // --- // CEU /// 0.1553 // --- // CHB /// 0.2163 // --- // JPT /// 0.0972 // --- // YRI	false
TWBv2.0	AX-11688720	Affx-28474833	rs9469113	6	32447441	G	A	+	A	0.1007099					0.0000 // --- // CEU /// 0.1068 // --- // CHB /// 0.1490 // --- // JPT /// 0.0648 // --- // YRI	false
