# Supplementary material for: Genome-wide association study of hyperthyroidism based on electronic medical record from Taiwan
Source: Front Med (Lausanne). 2022 Jul 27;9:830621. doi: 10.3389/fmed.2022.830621 (PMC9390483; doi:10.3389/fmed.2022.830621)
Supplement: Supplementary file 5 [file Table_4.XLSX]

## Sheet: chart_53931ECB42FD1641965012818
Category	Term	Count	%	PValue	Genes	List Total	Pop Hits	Pop Total	Fold Enrichment	Bonferroni	Benjamini	FDR
KEGG_PATHWAY	hsa05320:Autoimmune thyroid disease	4	40	1.6214e-06	HLA-B, HLA-DRA, CTLA4, TSHR	5	52	6879	105.831	4.86408e-05	4.86419e-05	4.86419e-05
KEGG_PATHWAY	hsa04514:Cell adhesion molecules (CAMs)	3	30	0.00247065	HLA-B, HLA-DRA, CTLA4	5	142	6879	29.0662	0.0715245	0.0370598	0.0370598
KEGG_PATHWAY	hsa05332:Graft-versus-host disease	2	20	0.0190553	HLA-B, HLA-DRA	5	33	6879	83.3818	0.438519	0.145228	0.145228
KEGG_PATHWAY	hsa05330:Allograft rejection	2	20	0.0213464	HLA-B, HLA-DRA	5	37	6879	74.3676	0.476557	0.145228	0.145228
KEGG_PATHWAY	hsa04940:Type I diabetes mellitus	2	20	0.0242046	HLA-B, HLA-DRA	5	42	6879	65.5143	0.520529	0.145228	0.145228
KEGG_PATHWAY	hsa05416:Viral myocarditis	2	20	0.0327417	HLA-B, HLA-DRA	5	57	6879	48.2737	0.631639	0.163709	0.163709
KEGG_PATHWAY	hsa04612:Antigen processing and presentation	2	20	0.0434748	HLA-B, HLA-DRA	5	76	6879	36.2053	0.736432	0.186321	0.186321
KEGG_PATHWAY	hsa05323:Rheumatoid arthritis	2	20	0.0502074	HLA-DRA, CTLA4	5	88	6879	31.2682	0.786763	0.188278	0.188278
KEGG_PATHWAY	hsa05169:Epstein-Barr virus infection	2	20	0.0690902	HLA-B, HLA-DRA	5	122	6879	22.5541	0.883258	0.230301	0.230301
KEGG_PATHWAY	hsa04145:Phagosome	2	20	0.0844282	HLA-B, HLA-DRA	5	150	6879	18.344	0.929079	0.253284	0.253284
